# Supplementary material for: Iron-catalyzed alkoxyl radical-mediated C–C bond cleavage/phosphorothiolation: a new approach to functionalized S-alkyl phosphorothioates
Source: Royal Society of Chemistry journal article supplement (doi:10.1039/d3ob00673e), 2023-01-01

## Supporting Information

### **Iron-catalyzed alkoxy radical-mediated C-C bond cleavage/phosphorothiolation: A new approach to functionalized S-alkyl phosphorothioates**

Ming Bai,<sup>a</sup> Shuai Liu,<sup>a</sup> Hong Xin,<sup>a</sup> Xu Yang<sup>b</sup>, Xin-Hua Duan,<sup>a,b</sup> and Li-Na Guo<sup>\*,a</sup>

*<sup>a</sup>Department of Chemistry, School of Chemistry, Xi'an Key Laboratory of Sustainable Energy Material Chemistry and Engineering Research Center of Energy Storage Materials and Devices, Ministry of Education, Xi'an Jiaotong University, Xi'an 710049, P. R. China.*

*<sup>b</sup>School of Electrical Engineering, Xi'an Jiaotong University, Xi'an, 710049, P. R. China.*

Email: guoln81@xjtu.edu.cn

## Table of Contents

|    |                                                                                                               |      |
|----|---------------------------------------------------------------------------------------------------------------|------|
| 1  | General Information                                                                                           | S3   |
| 2  | Starting Materials                                                                                            | S4   |
| 3  | Detailed Optimization of Reaction Conditions                                                                  | S7   |
| 4  | Representative Procedures for C-C Bond Cleavage/Phosphorothiolation                                           | S11  |
| 5  | Procedures for Derivatizations of <b>3aa</b>                                                                  | S13  |
| 6  | Large-Scale Synthesis of <b>3aa</b>                                                                           | S14  |
| 7  | Mechanistic Investigation                                                                                     | S15  |
| 8  | Characterization of Starting Material <b>2d</b>                                                               | S17  |
| 9  | Characterizations of Products <b>3</b>                                                                        | S17  |
| 10 | Characterizations of Products <b>5</b>                                                                        | S26  |
| 11 | Characterizations of Products <b>6aa</b> and <b>7aa</b>                                                       | S29  |
| 12 | References                                                                                                    | S30  |
| 13 | <sup>31</sup> P NMR, <sup>1</sup> H NMR and <sup>13</sup> C NMR Spectra of Starting Materials                 | S31  |
| 14 | <sup>13</sup> P NMR, <sup>1</sup> H NMR and <sup>13</sup> C NMR Spectra of Products <b>3</b> and <b>5</b>     | S34  |
| 15 | <sup>13</sup> P NMR, <sup>1</sup> H NMR and <sup>13</sup> C NMR Spectra of Products <b>6aa</b> and <b>7aa</b> | S104 |

## 1. General Information

Unless otherwise noted, reagents and solvents were obtained from commercial suppliers and were used without further purification. All catalytic reactions were carried out under nitrogen in Schlenk-tube. Analytical TLC: aluminum backed plates pre-coated (0.25 mm) with Merck Silica Gel 60F-254. Column chromatography purifications were carried out using silica gel. Melting points were measured using open glass capillaries in a SGW® X-4A apparatus.  $^1\text{H}$  and  $^{13}\text{C}$  NMR spectra were recorded on a Bruker 400 MHz spectrometer at ambient temperature. Coupling constants are reported in Hz with multiplicities denoted as s (singlet), d (doublet), t (triplet), q (quartet), m (multiplet) and br (broad). Infrared spectra were recorded on a Bruker V 70 and only major peaks were reported in  $\text{cm}^{-1}$ . HRMS were obtained on a WATERS I-Class VION IMS Q-ToF with an ESI source.

## 2. Starting Materials

### 2.1 The Synthesis of Cycloalkyl Hydroperoxides 1

The cycloalkyl hydroperoxides **1a-r** were prepared according to the literature.<sup>1</sup> The NMR spectra of the known compounds were in full accordance with the data in the literature.

### 2.2 General Procedure for the Synthesis of Hemiketal Hydroperoxides 4

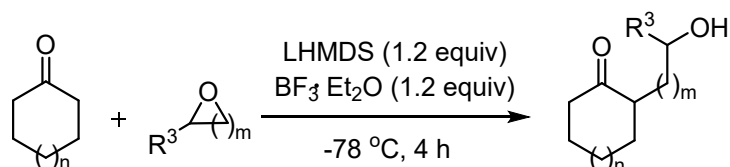

To a stirred solution of LHMDS (1.0 M in THF, 1.2 equiv.) in THF at  $-78\text{ }^\circ\text{C}$  was added cyclic ketone (10 mmol, 1.0 equiv.) over 5 mins. After 1 h, epoxide (2.0 equiv.) was added to the reaction solution.

After 1 h, the  $\text{BF}_3 \cdot \text{Et}_2\text{O}$  (1.2 equiv.) was added very slowly. The reaction mixture was stirred for 2 h at  $-78\text{ }^\circ\text{C}$  and the reaction was quenched by the addition of saturated aqueous  $\text{NH}_4\text{Cl}$  solution at  $-78\text{ }^\circ\text{C}$ . Layers were separated and the aqueous layer was extracted with EtOAc. The combined organic layers were washed with brine, dried over  $\text{Na}_2\text{SO}_4$ , and concentrated in vacuo. Finally, the residue was purified by column chromatography on silica gel (petroleum ether/ethyl acetate = 4:1) to obtain the  $\alpha$ -hydroxyalkyl ketone.

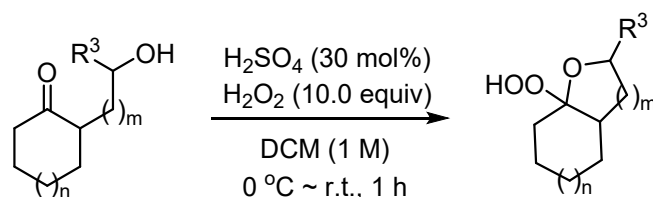

To a reaction flask was added a solution of  $\text{H}_2\text{O}_2$  (30% wt in  $\text{H}_2\text{O}$ , 10.0 equiv.), and conc.  $\text{H}_2\text{SO}_4$  (30 mol%), then a solution of  $\alpha$ -hydroxyalkyl ketone (1.0 equiv) in DCM (1.0 M) at  $0\text{ }^\circ\text{C}$  was added. The reaction mixture was stirred for 1 h at room temperature. The aqueous layer was extracted with DCM, and the combined organic layer was washed with brine, dried over  $\text{Na}_2\text{SO}_4$ , and concentrated in vacuo. Finally, the residue was purified by column chromatography on silica gel (petroleum ether/ethyl acetate = 4:1~10:1) to obtain the hemiketal hydroperoxide **4a-4g**.

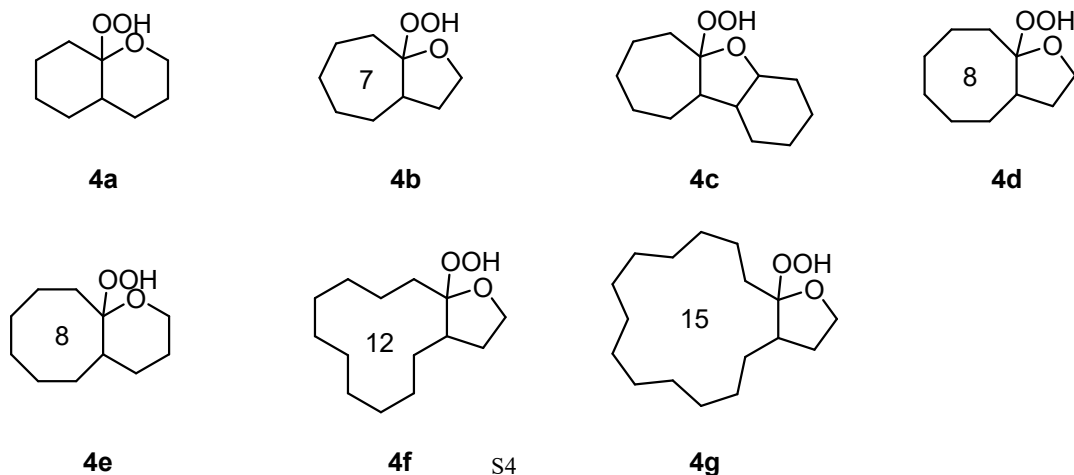

## 2.3 General Procedure for the Synthesis of *S*-Hydrogen Phosphorothioates<sup>2</sup> **2a-d**, **2f**.

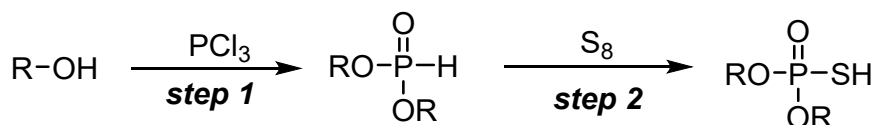

### *Step 1*

To a solution of the appropriate alcohol (3.0 equiv.) and pyridine (2.0 equiv.) in Et<sub>2</sub>O (0.3 M) at 0 °C was added PCl<sub>3</sub> (1.0 equiv.) over the course of 1 h. After complete addition, the reaction mixture was allowed to slowly warm to ambient temperature, and stirred for 16 h. The white suspension was then filtered under suction, and the residual pyridinium chloride was washed twice with Et<sub>2</sub>O. The combined filtrates were concentrated in vacuo to yield the desired phosphonates as colorless liquids.

### *Step 2*

To a two-necked round-bottom flask equipped with a reflux condenser and a rubber septum a suspension of the above phosphonate (1.0 equiv.) and solid S<sub>8</sub> (1.1 equiv.) in Et<sub>2</sub>O was added under argon. Then, NEt<sub>3</sub> (1.1 equiv.) was added slowly. After full conversion of the phosphonate, as monitored by <sup>31</sup>P NMR spectra, the suspension was diluted with Et<sub>2</sub>O to 100 mL and then washed with aqueous HCl (100 mL, 1M), dried over MgSO<sub>4</sub>, and concentrated in vacuo. The resulting suspension was filtered over a small cotton plug to obtain the *S*-hydrogen phosphorothioates **2a-2d** and **2f**.

## 2.4 General Procedure for the Synthesis of *S*-Hydrogen Phosphorothioate **2e**.

### *Step 1*

To a solution of 4-Chloro-1-butanol (3 equiv.) in DCM (1.5 mL) was added PCl<sub>3</sub> (1.0 equiv.) in DCM (0.5 M) over the course of 1h. Liberated HCl was removed by a constant nitrogen stream. After complete addition, the dropping funnel was washed with additional DCM (20 mL) and the reaction mixture was stirred for 16 h while purging nitrogen to remove all dissolved HCl. The solution was then concentrated in vacuo to yield the desired phosphonate.

### *Step 2*

To a two-necked round-bottom flask equipped with a reflux condenser and a rubber septum a suspension of the above phosphonate (1.0 equiv.) and solid S<sub>8</sub> (1.1 equiv.) in Et<sub>2</sub>O was added under argon. Then, NEt<sub>3</sub> (1.1 equiv.) was added slowly. After full conversion of the phosphonate, as monitored by <sup>31</sup>P NMR spectroscopy, the suspension was diluted with Et<sub>2</sub>O to 100 mL and then washed with aqueous HCl (100 mL, 1M), dried over MgSO<sub>4</sub>, and concentrated in vacuo. The resulting suspension was filtered over a small cotton plug to obtain the *S*-hydrogen phosphorothioate **2e**.

## 2.5 General Procedure for the Synthesis of P(O)SH Compounds 2g-j.

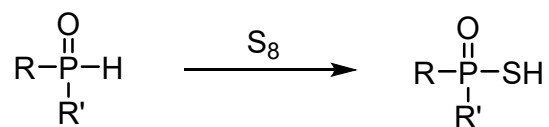

The precursors of P(O)SH compounds **2g-2j** were obtained from commercial suppliers. To a two-necked round-bottom flask equipped with a reflux condenser and a rubber septum a suspension of the above phosphonate (1.0 equiv.) and solid S<sub>8</sub> (1.1 equiv.) in Et<sub>2</sub>O was added under argon. Then, NEt<sub>3</sub> (1.1 equiv.) was added slowly. After full conversion of the phosphonate precursors, as monitored by <sup>31</sup>P NMR spectra, the suspension was diluted with Et<sub>2</sub>O to 100 mL and then washed with aqueous HCl (100 mL, 1 M), dried over MgSO<sub>4</sub>, concentrated under reduced pressure, and finally dried under vacuum. The resulting suspension was filtered over a small cotton plug to obtain the corresponding P(O)SH compounds **2g-2j**.

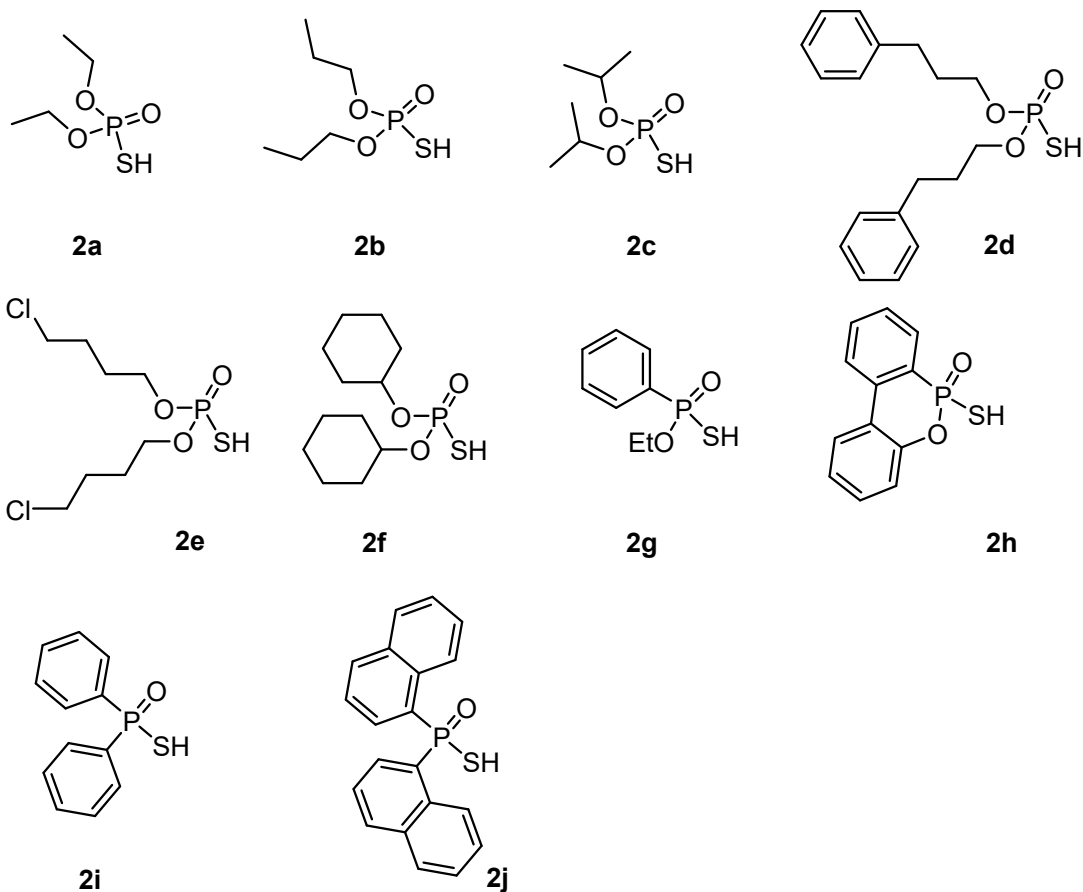

### 3. Detailed Optimization of Reaction Conditions

#### 3.1 General Procedure for Three-Component Coupling of HP(O)(OEt)<sub>2</sub> with S<sub>8</sub> and Cyclopentyl Hydroperoxide **1a**

To 10 mL oven-dried Schlenk-tube equipped with a magnetic stirrer was added catalyst and S<sub>8</sub> (0.4 mmol, 2.0 equiv.). Then the tube was evacuated and backfilled with nitrogen for three times. Subsequently, a solution of cyclopentyl hydroperoxide **1a** (0.2 mmol, 1.0 equiv.) and HP(O)(OEt)<sub>2</sub> (0.4 mmol, 2.0 equiv.) in solvent (2.0 mL) was added by syringe under nitrogen atmosphere. The tube was then sealed and mixture was stirred at room temperature for schedule time. After the reaction completed, the reaction mixture was concentrated in vacuo and purified by column chromatography on silica gel (petroleum ether/ethyl acetate = 2:1) to give the desired product **3aa**.

#### 3.2 Optimization of catalyst and solvent

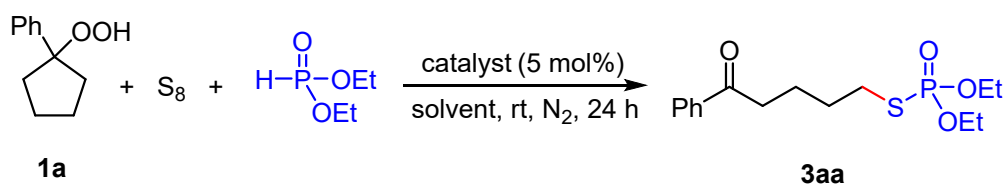

| Entry | Catalyst (mol%)                           | Solvent | Yield <sup>a</sup> (%) |
|-------|-------------------------------------------|---------|------------------------|
| 1     | CuI (10)                                  | MTBE    | 27                     |
| 2     | Cu(OAc) <sub>2</sub> (10)                 | MTBE    | 35                     |
| 3     | Fe(OTf) <sub>3</sub> (10)                 | MTBE    | 10                     |
| 4     | FeCl <sub>3</sub> ·6H <sub>2</sub> O (10) | MTBE    | 20                     |
| 5     | FeCl <sub>2</sub> (10)                    | MTBE    | trace                  |
| 6     | Fe(OTf) <sub>2</sub> (10)                 | MTBE    | 27                     |
| 7     | Fe(OTf) <sub>2</sub> (10)                 | EA      | 8                      |
| 8     | Fe(OTf) <sub>2</sub> (10)                 | DME     | trace                  |
| 9     | Fe(OTf) <sub>2</sub> (10)                 | DCM     | 13                     |
| 10    | Fe(OTf) <sub>2</sub> (10)                 | toluene | n.r.                   |
| 11    | Fe(OTf) <sub>2</sub> (10)                 | MeOH    | n.r.                   |

<sup>a</sup>Reaction conditions: **1a** (0.2 mmol, 1.0 equiv.), HPO(OEt)<sub>2</sub> (0.4 mmol, 2.0 equiv.), S<sub>8</sub> (0.4 mmol, 2.0 equiv.), catalyst (10 mol%), and solvent (2.0 mL), rt 24 h, under N<sub>2</sub>. Isolated yields.

### 3.3 General Procedure for Phosphorothiolation of Cyclopentyl Hydroperoxide **1a**

A 10 mL oven-dried Schlenk-tube equipped with a magnetic stirrer was added catalyst, then the tube was evacuated and backfilled with nitrogen for three times. Subsequently, a solution of cyclopentyl hydroperoxide **1a** (0.2 mmol, 1.0 equiv.) and HSP(O)(OEt)<sub>2</sub> **2a** (0.4 mmol, 2.0 equiv.) in solvent (2.0

| Entry | Catalyst (mol%)                 | Yield (%) | mL)     |
|-------|---------------------------------|-----------|---------|
| 1     | CuI (5)                         | 64        | was     |
| 2     | Cu(OAc) <sub>2</sub> (5)        | 60        | added   |
| 3     | CuOTf (5)                       | 64        | by      |
| 4     | Co(acac) <sub>2</sub> (5)       | trace     | syringe |
| 5     | NiCl <sub>2</sub> (5)           | n.r.      | under   |
| 6     | Fe(OTf) <sub>2</sub> (5)        | 71        | nitroge |
| 7     | <b>Fe(OTf)<sub>2</sub> (10)</b> | <b>94</b> | n       |
| 8     | Fe(OTf) <sub>2</sub> (15)       | 74        |         |
| 9     | Fe(OTf) <sub>2</sub> (5)        | 66        |         |
| 10    | FeCl <sub>3</sub> (5)           | 60        |         |
| 11    | FeBr <sub>2</sub> (5)           | trace     |         |
| 12    | Fe(OAc) <sub>2</sub> (5)        | 57        | atmosph |

here. The tube was then sealed and mixture was stirred at room temperature for schedule time. After the reaction completed, the reaction mixture was concentrated in vacuo and purified by column chromatography on silica gel (petroleum ether/ethyl acetate = 2:1) to give the target product **3aa**.

### 3.4 Optimization of Phosphorothiolation of Cyclopentyl Hydroperoxide **1a**

#### *Catalyst and Amount*



<sup>a</sup>Reaction conditions: **1a** (0.2 mmol, 1.0 equiv.), **2a** (0.4 mmol, 2.0 equiv.), catalyst (x mol%), and MTBE (2 mL), rt 24 h, under N<sub>2</sub>. Isolated yields.

### Solvent

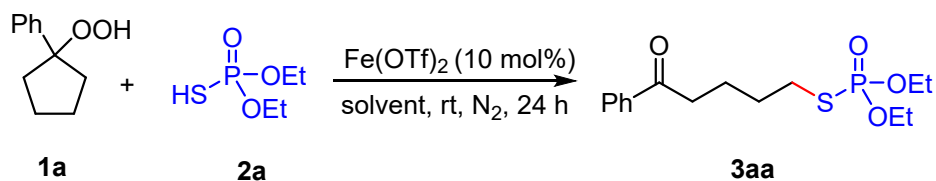

| Entry | Solvent     | Yield (%) |
|-------|-------------|-----------|
| 1     | MeCN        | 44        |
| 2     | THF         | 50        |
| 3     | MTBE        | 94        |
| 4     | 1,4-dioxane | 42        |
| 5     | EtOH        | 38        |
| 6     | EtOAc       | 85        |
| 7     | toluene     | 62        |
| 8     | DMSO        | trace     |
| 9     | DMF         | trace     |

<sup>a</sup>Reaction conditions: **1a** (0.2 mmol, 1.0 equiv.), **2a** (0.4 mmol, 2.0 equiv.), Fe(OTf)<sub>2</sub> (10 mol%), and solvent (2 mL), rt 24 h, under N<sub>2</sub>. Isolated yields.

### Time and Amount of 2a

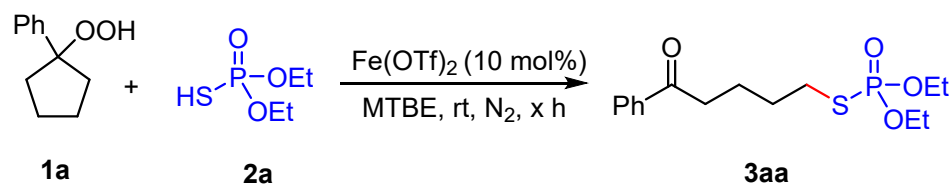

| Entry | Time (h) | Yield (%)       |
|-------|----------|-----------------|
| 1     | 24       | 94              |
| 2     | 12       | 94              |
| 3     | 6        | 86              |
| 4     | 12       | 80 <sup>b</sup> |

<sup>a</sup>Reaction conditions: **1a** (0.2 mmol, 1.0 equiv.), **2a** (0.4 mmol, 2.0 equiv.), Fe(OTf)<sub>2</sub> (10 mol%), and MTBE (2 mL), rt x h, under N<sub>2</sub>. Isolated yields. <sup>b</sup>**1a** (0.2 mmol, 1.0 equiv.), **2a** (0.3 mmol, 1.5 equiv.)

### Control Experiments

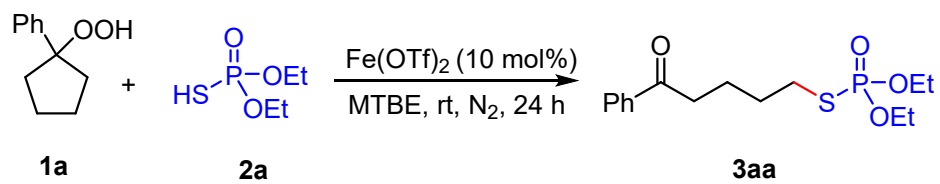

| Entry | Variation from standard Conditions   | Yield (%) |
|-------|--------------------------------------|-----------|
| 1     | -                                    | 94        |
| 2     | Without Fe(OTf) <sub>2</sub> , rt    | trace     |
| 3     | Without Fe(OTf) <sub>2</sub> , 60 °C | 17        |
| 4     | Under air                            | 25        |

<sup>a</sup>Reaction conditions: **1a** (0.2 mmol, 1.0 equiv.), **2a** (0.4 mmol, 2.0 equiv.), Fe(OTf)<sub>2</sub> (10 mol%), and MTBE (2 mL), rt 24 h, under N<sub>2</sub>. Isolated yields.

## 4. Representative Procedures for C-C Bond Cleavage/Phosphorothiolation

### 4.1 Representative Procedure for Phosphorothiolation of Cycloalkyl Hydroperoxide **1** with **2**

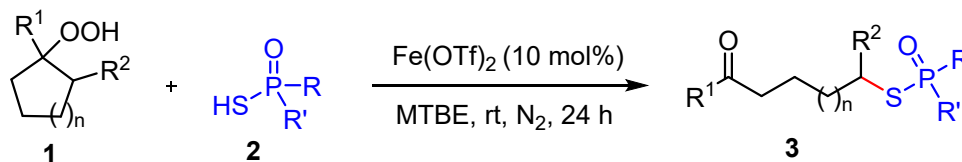

To a 10 mL oven-dried Schlenk-tube equipped with a magnetic stirrer was added Fe(OTf)<sub>2</sub> (0.02 mmol, 10 mol%). Then the tube was evacuated and backfilled with nitrogen for three times. Subsequently, a solution of cycloalkyl hydroperoxide **1** (0.2 mmol, 1.0 equiv.), and S-hydrogen phosphorothioate **2** (0.4 mmol, 2.0 equiv.) in MTBE (2.0 mL) was added by syringe under nitrogen atmosphere. The tube was then sealed and mixture was stirred at room temperature for 24 h. After the reaction completed, the organic layer was concentrated in vacuo, and purified by column chromatography on silica gel (petroleum ether/ethyl acetate = 2:1) to give the target products **3**.

### 4.2 Representative Procedure for Phosphorothiolation of Hemiketal Hydroperoxides **4** with **2a**

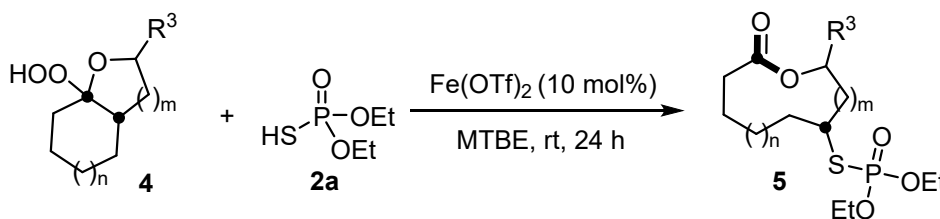

To a 10 mL oven-dried Schlenk-tube equipped with a magnetic stirrer was added Fe(OTf)<sub>2</sub> (0.02 mmol, 10 mol%). Then the tube was evacuated and backfilled with nitrogen for three times. Subsequently, a solution of hemiketal hydroperoxide **4** (0.2 mmol, 1.0 equiv.), and diethyl thiophosphate **2a** (0.4 mmol, 2.0 equiv.) in MTBE (2.0 mL) was added by syringe under nitrogen atmosphere. The tube was then sealed and mixture was stirred at room temperature for 24 h. After the reaction completed, the organic layer was concentrated in vacuo, which was purified by column chromatography on silica gel (petroleum ether/ethyl acetate = 5:1) to give the target products **5**.

### 4.3 Representative Telescoped Procedure for Phosphorothiolation of Cycloalkanol

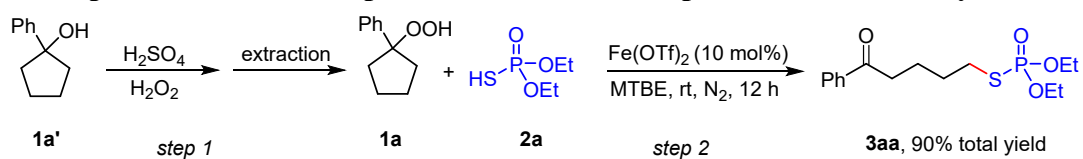

#### Step 1:

To a 10 mL reaction tube equipped with a magnetic stirrer was added a solution of  $\text{H}_2\text{O}_2$  (30% wt in  $\text{H}_2\text{O}$ , 10.0 equiv.), and conc.  $\text{H}_2\text{SO}_4$  (30 mol%). Then a solution of the alcohol **1a'** (0.2 mmol, 1.0 equiv.) in DCM (1.0 M) at 0 °C was added. Then, the reaction mixture was stirred for 1 h from 0 °C to 25 °C. After the reaction completed, it was diluted with DCM (5.0 mL) and  $\text{H}_2\text{O}$  (5.0 mL). The organic layer was separated and the water layer was extracted with DCM ( $3 \times 5$  mL). The combined organic layer was washed with saturated brine, dried over  $\text{Na}_2\text{SO}_4$  and concentrated in vacuo. The crude product **1a** was used in the next step without further purification

#### Step 2:

The second step procedure was followed the above-mentioned procedure 4.1, using the crude **1a** instead of the purified **1a**. The total yield of **3aa** based on the alcohol **1a'** was given in Scheme 3.

## 5. Procedures for Derivatizations of 3aa

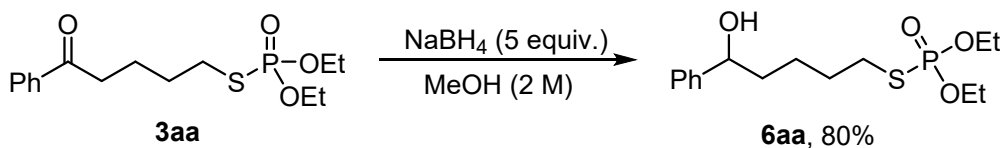

### 5.1 Reduction of 3aa

To a 10 mL oven-dried reaction tube equipped with a magnetic stirrer was added a solution of **3aa** (0.2 mmol, 1.0 equiv.) in MeOH (4 mL). Then, NaBH<sub>4</sub> (1.0 mmol, 5.0 equiv.) was added slowly at 0 °C. The reaction mixture was stirred until **3aa** completely converted. After that, 20 mL of H<sub>2</sub>O was added, and the water layer was extracted with DCM (3 × 5 mL). The combined organic layer was dried over Na<sub>2</sub>SO<sub>4</sub> and concentrated in vacuo. Finally, the residue was purified by column chromatography on silica gel (petroleum ether/ethyl acetate = 2:1) to give the target product **6aa** (80%, 51.5 mg).

### 5.2 Wittig Reaction of 3aa

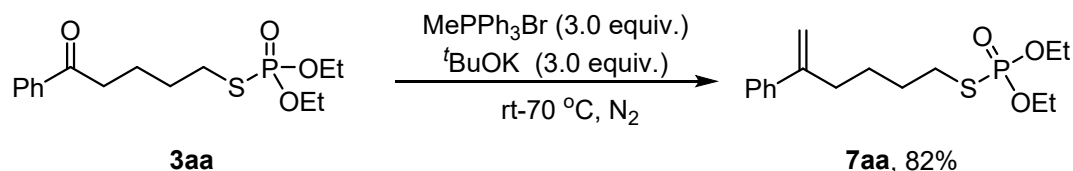

To the mixture of <sup>t</sup>BuOK (0.3 mmol, 1.5 equiv.) and MePPh<sub>3</sub>Br (0.3 mmol, 1.5 equiv.) was added anhydrous THF (1 mL) under nitrogen atmosphere. The suspension was stirred at room temperature for 1 h, and then the **3aa** (0.2 mmol, 1.0 equiv.) was added. The resulting mixture was stirred at 70 °C for 24 h. During the reaction, when the yellow reaction solution fades midway, another amount of ylide solution (prepared with <sup>t</sup>BuOK (0.3 mmol, 1.5 equiv.) and MePPh<sub>3</sub>Br (0.3 mmol, 1.5 equiv.) in advance) needs to be added under nitrogen atmosphere. Then the mixture was filtered. After evaporation of the organic solvent, the residue was purified by column chromatography on silica gel (petroleum ether/ethyl acetate = 2:1) to give the target product **7aa** (82%, 53.4 mg).

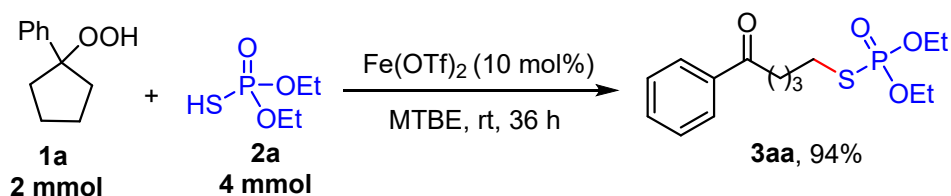

## 6. Large-Scale Synthesis of 3aa

To 100 mL oven-dried Schlenk-tube equipped with a magnetic stirrer was added  $\text{Fe(OTf)}_2$  (0.2 mmol, 10 mol%), then the tube was evacuated and backfilled with nitrogen for three times. Subsequently, a solution of **1a** (2 mmol, 1.0 equiv.) and **2a** (4 mmol, 2.0 equiv.) in MTBE (20.0 mL) was added by syringe under nitrogen atmosphere. The tube was then sealed and mixture was stirred at room temperature for 36 h. After the reaction completed. The combined organic layer was concentrated in vacuo and purified by column chromatography on silica gel (petroleum ether/ethyl acetate = 2:1) to give the target product **3aa** in 94% yield (617.8 mg).

## 7. Mechanistic Investigation

### 7.1 Radical Trapping Experiment

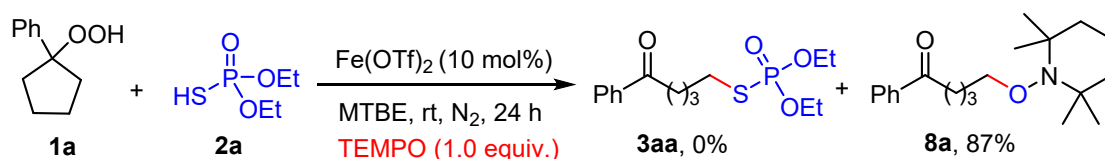

To 10 mL oven-dried Schlenk-tube equipped with a magnetic stirrer was added  $\text{Fe(OTf)}_2$  (0.02 mmol, 10 mol%), and TEMPO (0.2 mmol, 1.0 equiv.). Then the tube was evacuated and backfilled with nitrogen for three times. Subsequently, a solution of cyclopentyl hydroperoxide **1a** (0.2 mmol, 1.0 equiv.) and **2a** (0.4 mmol, 2.0 equiv.) in MTBE (2.0 mL) was added by syringe under nitrogen atmosphere. The tube was then sealed and mixture was stirred at room temperature for 24 h. It was found that no **3aa** was detected, along with TEMPO-adduct **8a** isolated in 87% yield. These results indicate that a radical intermediate might be involved in this transformation.

### 7.2 Radical Inhibiting Experiment

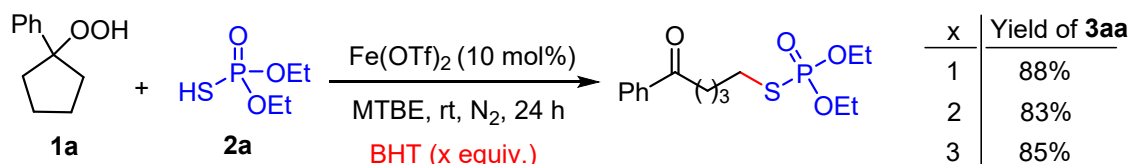

To 10 mL oven-dried Schlenk-tube equipped with a magnetic stirrer was added  $\text{Fe(OTf)}_2$  (0.02mmol, 10 mol%) and BHT (0.2 mmol, 1.0 equiv. ). Then the tube was evacuated and backfilled with nitrogen for three times. Subsequently, a solution of cyclopentyl hydroperoxide **1a** (0.2 mmol, 1.0 equiv.) and **2a** (0.4 mmol, 2.0 equiv.) in MTBE (2.0 mL) was added by syringe under nitrogen atmosphere. The tube was then sealed and mixture was stirred at room temperature for 24 h. In this case, the product **3a** could be isolated in 88% yield, which is comparable with that in the absence of BHT. Moreover, 2.0 equiv and 3.0 equiv of BHT were added to the reaction of **1a** and **2a**, respectively. It was found that the addition of BHT did not affect the yield of **3aa** obviously.

### 7.3 Key Intermediate Examination Experiment

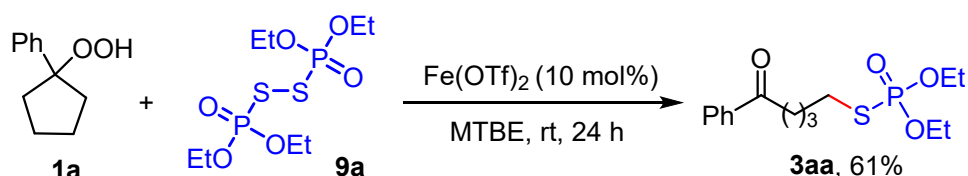

#### Step 1

To a solution of  $\text{HSP(O)(OEt)}_2$  **2a** (1.0 equiv.) in MeCN (1 M) was added TBHP (1.0 equiv., 70% aq.) by syringe. Then, the mixture was stirred for 8 h at 60 °C. After the reaction completed, the organic layer was concentrated in vacuo, and purified by column chromatography on silica gel (petroleum ether/ethyl acetate = 10:1) to give the phosphoryl persulfide **9a**.



## ***Step 2***

To 10 mL oven-dried Schlenk-tube equipped with a magnetic stirrer was added Fe(OTf)<sub>2</sub> (0.02mmol, 10 mol%). Then the tube was evacuated and backfilled with nitrogen for three times. Subsequently, a solution of cycloalkyl hydroperoxide **1a** (0.2 mmol, 1.0 equiv.) and phosphoryl persulfide **9a** (0.4 mmol, 2.0 equiv.) in MTBE (2.0 mL) was added by syringe under nitrogen atmosphere. The tube was then sealed and the mixture was stirred at room temperature for 24 h. After the reaction completed, the organic layer was concentrated in vacuo, and purified by column chromatography on silica gel (petroleum ether/ethyl acetate = 2:1) to give the product **3aa** in 61% yield.

## 8. Characterization of Starting Material 2d

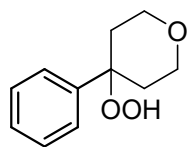

**1s**

**4-Hydroperoxy-4-phenyltetrahydro-2H-pyran (1s)** White solid (727.5 mg, 75%).  $^1\text{H}$  NMR (400 MHz,  $\text{CDCl}_3$ )  $\delta$  7.48 – 7.46 (m, 2H), 7.41 (t,  $J = 7.2$  Hz, 2H), 7.33 (tt,  $J = 6.4, 1.2$  Hz, 2H), 3.91 – 3.78 (m, 4H), 2.15 – 2.10 (m, 4H).  $^{13}\text{C}$  NMR (100 MHz,  $\text{CDCl}_3$ )  $\delta$  143.4, 128.9, 81.7, 63.7, 34.0. IR (neat):  $\nu_{\text{max}}$  ( $\text{cm}^{-1}$ ) 3300, 2956, 1603, 1359, 1128, 834, 783. HRMS (ESI) calcd for  $\text{C}_{18}\text{H}_{28}\text{O}_3\text{NPS}$   $[\text{M}+\text{NH}_4]^+$  212.1281, found 212.1275.

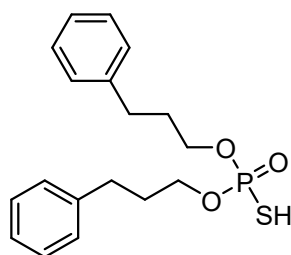

**2d**

**O,O-Bis(3-phenylpropyl) S-hydrogen phosphorothioate (2d)** Yellow oil (61.8 mg, 94%).  $^1\text{H}$  NMR (400 MHz,  $\text{CDCl}_3$ )  $\delta$  7.32 – 7.28 (m, 4H), 7.22 – 7.17 (m, 6H), 5.16 – 5.13 (m, 1H), 4.14 – 4.11 (t,  $J = 8.0$  Hz, 4H), 2.76 – 2.72 (t,  $J = 7.6$  Hz, 4H), 2.06 – 2.00 (m, 4H).  $^{13}\text{C}$  NMR (100 MHz,  $\text{CDCl}_3$ )  $\delta$  141.1, 128.6, 128.6, 126.2, 67.5 (d,  $J = 5.3$  Hz), 31.8 (d,  $J = 3.9$  Hz), 31.7.  $^{31}\text{P}$  NMR (162 MHz,  $\text{CDCl}_3$ )  $\delta$  67.0. IR (neat):  $\nu_{\text{max}}$  ( $\text{cm}^{-1}$ ) 3027, 2954, 1603, 1015, 745. HRMS (ESI) calcd for  $\text{C}_{18}\text{H}_{24}\text{O}_3\text{PS}$   $[\text{M}+\text{H}]^+$  351.1178, found 357.1181.

## 9. Characterizations of Products 3

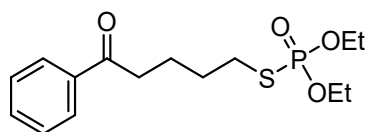

**O,O-Diethyl S-(5-oxo-5-phenylpentyl) phosphorothioate (3aa)** Colorless oil (61.8 mg, 94%).  $R_f = 0.3$  (petroleum ether/ethyl acetate = 2:1).  $^1\text{H}$  NMR (400 MHz,  $\text{CDCl}_3$ )  $\delta$  7.94 (d,  $J = 7.2$  Hz, 2H), 7.56 (t,  $J = 7.2$  Hz, 1H), 7.45 (t,  $J = 8.0$  Hz, 2H), 4.21 – 4.10 (m, 4H), 3.00 (t,  $J = 6.4$  Hz, 2H), 2.92 – 2.85 (m, 2H), 1.88 – 1.79 (m, 4H), 1.35 (t,  $J = 7.2$  Hz, 6H).  $^{13}\text{C}$  NMR (100 MHz,  $\text{CDCl}_3$ )  $\delta$  199.7, 137.0, 133.2, 128.7, 128.1, 63.7 (d,  $J = 6.0$  Hz), 37.8, 30.8 (d,  $J = 3.9$  Hz), 30.5 (d,  $J = 5.4$  Hz), 23.1, 16.2 (d,  $J = 7.1$  Hz).  $^{31}\text{P}$  NMR (162 MHz,  $\text{CDCl}_3$ )  $\delta$  28.0. IR (neat):  $\nu_{\text{max}}$  ( $\text{cm}^{-1}$ ) 2932, 1721, 1015, 789, 572. HRMS (ESI) calcd for  $\text{C}_{15}\text{H}_{24}\text{O}_4\text{PS}$   $[\text{M}+\text{H}]^+$  331.1127, found 331.1133.

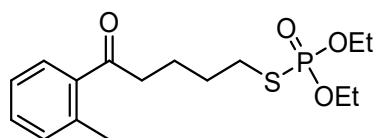

***O,O*-Diethyl *S*-(5-oxo-5-(*o*-tolyl)pentyl) phosphorothioate (3ba)** Colorless oil (55.2 mg, 80%).  $R_f = 0.3$  (petroleum ether/ethyl acetate = 2:1).  $^1\text{H NMR}$  (400 MHz,  $\text{CDCl}_3$ )  $\delta$  7.61 (d,  $J = 8.0$  Hz, 1H), 7.37 (t,  $J = 6.4$  Hz, 1H), 7.25 (t,  $J = 6.8$  Hz, 2H), 4.22 – 4.11 (m, 4H), 2.94 – 2.84 (m, 4H), 2.48 (s, 3H), 1.82 – 1.79 (m, 4H), 1.36 (t,  $J = 6.8$  Hz, 6H).  $^{13}\text{C NMR}$  (100 MHz,  $\text{CDCl}_3$ )  $\delta$  203.9, 138.1, 138.0, 132.1, 131.4, 128.5, 125.8, 63.7 (d,  $J = 6.0$  Hz), 40.8, 30.8 (d,  $J = 3.9$  Hz), 30.5 (d,  $J = 5.4$  Hz), 23.3, 21.4, 16.2 (d,  $J = 7.3$  Hz).  $^{31}\text{P NMR}$  (162 MHz,  $\text{CDCl}_3$ )  $\delta$  28.0. IR (neat):  $\nu_{\text{max}}$  ( $\text{cm}^{-1}$ ) 2929, 1685, 1455, 1016, 759, 572. HRMS (ESI) calcd for  $\text{C}_{16}\text{H}_{26}\text{O}_4\text{PS}$   $[\text{M}+\text{H}]^+$  345.1284 found 345.1286.

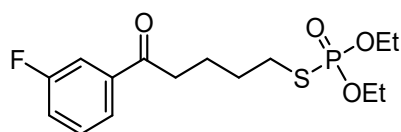

***O,O*-Diethyl *S*-(5-(3-fluorophenyl)-5-oxopentyl) phosphorothioate (3ca)** Colorless oil (62.6 mg, 90%).  $R_f = 0.3$  (petroleum ether/ethyl acetate = 2:1).  $^1\text{H NMR}$  (400 MHz,  $\text{CDCl}_3$ )  $\delta$  7.71 (d,  $J = 7.6$  Hz, 1H), 7.60 (t,  $J = 9.6$  Hz, 1H), 7.45 – 7.40 (m, 1H), 7.25 – 7.22 (m, 1H), 4.20 – 4.01 (m, 4H), 2.97 (t,  $J = 6.4$  Hz, 2H), 2.90 – 2.83 (m, 2H), 1.86 – 1.75 (m, 4H), 1.36 – 1.32 (t,  $J = 7.2$  Hz, 6H).  $^{13}\text{C NMR}$  (100 MHz,  $\text{CDCl}_3$ )  $\delta$  198.4 (d,  $J_F = 1.9$  Hz), 163.0 (d,  $J_F = 246.4$  Hz), 139.0 (d,  $J_F = 6.0$  Hz), 130.4 (d,  $J_F = 7.6$  Hz), 123.8 (d,  $J_F = 3.0$  Hz), 120.2 (d,  $J_F = 21.4$  Hz), 114.8 (d,  $J_F = 22.0$  Hz), 63.6 (d,  $J_p = 6.0$  Hz), 38.0, 30.7 (d,  $J_p = 3.9$  Hz), 30.4 (d,  $J_p = 5.0$  Hz), 22.9, 16.2 (d,  $J_p = 7.2$  Hz).  $^{31}\text{P NMR}$  (162 MHz,  $\text{CDCl}_3$ )  $\delta$  28.0. IR (neat):  $\nu_{\text{max}}$  ( $\text{cm}^{-1}$ ) 2936, 1687, 1443, 1019, 790, 573. HRMS (ESI) calcd for  $\text{C}_{15}\text{H}_{23}\text{O}_4\text{FPS}$   $[\text{M}+\text{H}]^+$  349.1033, found 349.1037

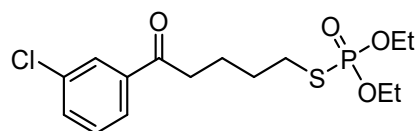

***O,O*-Diethyl *S*-(5-(3-chlorophenyl)-5-oxopentyl) phosphorothioate (3da)** Colorless oil (56.2 mg, 77%).  $R_f = 0.3$  (petroleum ether/ethyl acetate = 2:1).  $^1\text{H NMR}$  (400 MHz,  $\text{CDCl}_3$ )  $\delta$  7.91 (t,  $J = 1.6$  Hz, 1H), 7.83 – 7.81 (m, 1H), 7.83 – 7.81 (m, 1H), 7.40 (t,  $J = 7.6$  Hz, 1H), 4.23 – 4.10 (m, 4H), 2.98 (t,  $J = 6.8$  Hz, 2H), 2.92 – 2.84 (m, 2H), 1.89 – 1.74 (m, 4H), 1.88 – 1.79 (m, 6H).  $^{13}\text{C NMR}$  (100 MHz,  $\text{CDCl}_3$ )  $\delta$  198.4, 138.4, 135.1, 133.1, 130.1, 128.2, 126.2, 63.7 (d,  $J = 5.9$  Hz), 38.0, 30.7 (d,  $J = 3.8$  Hz), 30.4 (d,  $J = 5.2$  Hz), 22.9, 16.2 (d,  $J = 7.4$  Hz).  $^{31}\text{P NMR}$  (162 MHz,  $\text{CDCl}_3$ )  $\delta$  28.6. IR (neat):  $\nu_{\text{max}}$  ( $\text{cm}^{-1}$ ) 2936, 1687, 1443, 1019, 790, 573. HRMS (ESI) calcd for  $\text{C}_{15}\text{H}_{22}\text{O}_4\text{ClPSK}$   $[\text{M}+\text{K}]^+$  403.0311, found 403.0297.

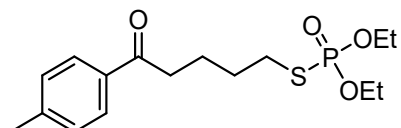

***O,O*-Diethyl *S*-(5-oxo-5-(*p*-tolyl)pentyl) phosphorothioate (3ea)** Colorless oil (51.1 mg, 74%).  $R_f = 0.3$  (petroleum ether/ethyl acetate = 2:1).  $^1\text{H NMR}$  (400 MHz,  $\text{CDCl}_3$ )  $\delta$  7.76 – 7.73 (m, 2H), 7.38 – 7.32 (m, 2H), 4.22 – 4.10 (m, 4H), 2.99 (t,  $J = 6.8$  Hz, 2H), 2.92 – 2.85 (m, 2H), 2.41 (s, 3H), 1.89 – 1.77 (m, 4H), 1.37 – 1.34 (m, 6H).  $^{13}\text{C NMR}$  (100 MHz,  $\text{CDCl}_3$ )  $\delta$  200.0, 138.5, 137.0, 134.0, 128.65, 128.62,

125.4, 63.7 (d,  $J = 5.8$  Hz), 37.9, 30.8 (d,  $J = 3.8$  Hz), 30.5 (d,  $J = 5.5$  Hz), 23.2, 21.5, 16.2 (d,  $J = 7.3$  Hz).  $^{31}\text{P}$  NMR (162 MHz,  $\text{CDCl}_3$ )  $\delta$  28.7. IR (neat):  $\nu_{\text{max}}$  ( $\text{cm}^{-1}$ ) 2927, 1682, 1448, 1019, 967, 787, 574. HRMS (ESI) calcd for  $\text{C}_{16}\text{H}_{26}\text{O}_4\text{PS}$   $[\text{M}+\text{H}]^+$  345.1284, found 345.1291.

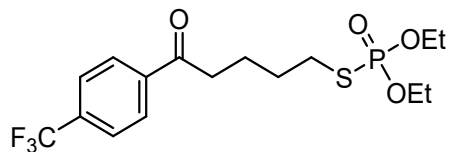

***O,O*-Diethyl *S*-(5-oxo-5-(4-(trifluoromethyl)phenyl)pentyl) phosphorothioate (3fa)** Colorless oil (61.2 mg, 77%).  $R_f = 0.3$  (petroleum ether/ethyl acetate = 2:1).  $^1\text{H}$  NMR (400 MHz,  $\text{CDCl}_3$ )  $\delta$  8.04 (d,  $J = 8.0$  Hz, 2H), 7.71 (d,  $J = 8.4$  Hz, 2H), 4.20 – 4.09 (m, 4H), 3.02 (t,  $J = 6.7$  Hz, 2H), 2.91 – 2.84 (m, 2H), 1.89 – 1.75 (m, 4H), 1.34 (t,  $J = 7.2$  Hz, 6H).  $^{13}\text{C}$  NMR (100 MHz,  $\text{CDCl}_3$ )  $\delta$  198.6, 139.6, 134.5 (q,  $J_F = 32.6$  Hz), 128.4, 125.8 (q,  $J_F = 3.7$  Hz), 123.7 (q,  $J_F = 271.1$  Hz), 63.7 (d,  $J_p = 6.1$  Hz), 38.1, 30.6 (d,  $J_p = 3.8$  Hz), 30.4 (d,  $J_p = 5.3$  Hz), 22.8, 16.1 (d,  $J_p = 7.2$  Hz).  $^{31}\text{P}$  NMR (162 MHz,  $\text{CDCl}_3$ )  $\delta$  27.9. IR (neat):  $\nu_{\text{max}}$  ( $\text{cm}^{-1}$ ) 2937, 1692, 1251, 1016, 793, 573. HRMS (ESI) calcd for  $\text{C}_{16}\text{H}_{23}\text{F}_3\text{O}_4\text{PS}$   $[\text{M}+\text{H}]^+$  399.1001, found 399.1003.

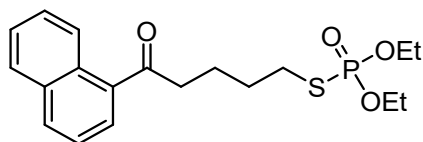

***O,O*-Diethyl *S*-(5-(naphthalen-1-yl)-5-oxopentyl) phosphorothioate (3ga)** Colorless oil (59.3 mg, 78%).  $R_f = 0.3$  (petroleum ether/ethyl acetate = 2:1).  $^1\text{H}$  NMR (400 MHz,  $\text{CDCl}_3$ )  $\delta$  8.55 (d,  $J = 8.4$  Hz, 1H), 7.98 (d,  $J = 8.0$  Hz, 1H), 7.86 (t,  $J = 9.2$  Hz, 2H), 7.60 – 7.47 (m, 3H), 4.23 – 4.10 (m, 4H), 3.09 (t,  $J = 6.8$  Hz, 2H), 2.93 – 2.86 (m, 2H), 1.95 – 1.79 (m, 4H), 1.35 (t,  $J = 6.8$  Hz, 6H).  $^{13}\text{C}$  NMR (100 MHz,  $\text{CDCl}_3$ )  $\delta$  204.1, 136.1, 134.1, 132.7, 130.2, 128.6, 128.0, 127.5, 126.6, 125.8, 124.5, 63.7 (d,  $J = 5.9$  Hz), 41.4, 30.8 (d,  $J = 3.8$  Hz), 30.5 (d,  $J = 5.4$  Hz), 23.6, 16.2 (d,  $J = 7.2$  Hz).  $^{31}\text{P}$  NMR (162 MHz,  $\text{CDCl}_3$ )  $\delta$  28.1. IR (neat):  $\nu_{\text{max}}$  ( $\text{cm}^{-1}$ ) 2982, 1681, 1245, 1169, 1019, 786, 574. HRMS (ESI) calcd for  $\text{C}_{19}\text{H}_{26}\text{O}_4\text{PS}$   $[\text{M}+\text{H}]^+$  381.1284, found 381.1288.

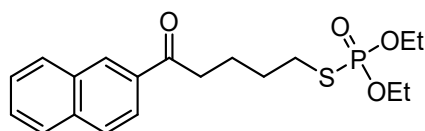

***O,O*-Diethyl *S*-(5-(naphthalen-2-yl)-5-oxopentyl) phosphorothioate (3ha)** Colorless oil (55.5 mg, 73%).  $R_f = 0.3$  (petroleum ether/ethyl acetate = 2:1).  $^1\text{H}$  NMR (400 MHz,  $\text{CDCl}_3$ )  $\delta$  8.45 (s, 1H), 8.02 – 7.94 (m, 2H), 7.87 (t,  $J = 8.4$  Hz, 2H), 7.61 – 7.52 (m, 2H), 4.21 – 4.10 (m, 4H), 3.13 (t,  $J = 6.8$  Hz, 2H), 2.94 – 2.87 (m, 2H), 1.93 – 1.81 (m, 4H), 1.35 (t,  $J = 6.8$  Hz, 6H).  $^{13}\text{C}$  NMR (100 MHz,  $\text{CDCl}_3$ )  $\delta$  199.7, 135.7, 134.2, 132.6, 129.7, 129.6, 128.57, 128.55, 127.9, 126.9, 123.9, 63.7 (d,  $J = 6.0$  Hz), 37.9, 30.8 (d,  $J = 3.9$  Hz), 30.5 (d,  $J = 5.5$  Hz), 23.3, 16.2 (d,  $J = 7.2$  Hz).  $^{31}\text{P}$  NMR (162 MHz,  $\text{CDCl}_3$ )  $\delta$  28.1. IR (neat):  $\nu_{\text{max}}$  ( $\text{cm}^{-1}$ ) 2982, 1679, 1248, 1019, 757, 573. HRMS (ESI) calcd for  $\text{C}_{19}\text{H}_{26}\text{O}_4\text{PS}$   $[\text{M}+\text{H}]^+$  381.1284, found 381.1288.

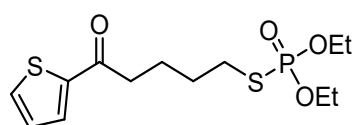

***O,O*-Diethyl *S*-(5-oxo-5-(thiophen-2-yl)pentyl) phosphorothioate (3ia)** Colorless oil (48.4 mg, 72%).  $R_f = 0.3$  (petroleum ether/ethyl acetate = 2:1).  $^1\text{H}$  NMR (400 MHz,  $\text{CDCl}_3$ )  $\delta$  7.71 (d,  $J = 3.2$  Hz, 1H),

7.63 (d,  $J = 4.8$  Hz, 1H), 7.13 (t,  $J = 4.8$  Hz, 1H), 4.23 – 4.10 (m, 4H), 2.95 – 2.84 (m, 4H), 1.90 – 1.77 (m, 4H), 1.35 (t,  $J = 6.8$  Hz, 6H).  $^{13}\text{C}$  NMR (100 MHz,  $\text{CDCl}_3$ )  $\delta$  192.7, 144.3, 133.7, 132.0, 128.3, 63.7 (d,  $J = 6.0$  Hz), 38.6, 30.7 (d,  $J = 3.8$  Hz), 30.5 (d,  $J = 5.1$  Hz), 23.5, 16.2 (d,  $J = 7.2$  Hz).  $^{31}\text{P}$  NMR (162 MHz,  $\text{CDCl}_3$ )  $\delta$  28.0. IR (neat):  $\nu_{\text{max}}$  ( $\text{cm}^{-1}$ ) 2929, 1660, 1162, 1015, 734, 574. HRMS (ESI) calcd for  $\text{C}_{13}\text{H}_{22}\text{O}_4\text{PS}$   $[\text{M}+\text{H}]^+$  337.0692, found 337.0697.

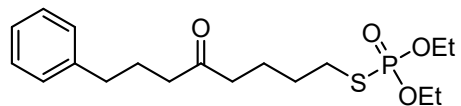

***O,O*-Diethyl *S*-(5-oxo-8-phenyloctyl) phosphorothioate (3ja)** Colorless oil (66.2 mg, 89%).  $R_f = 0.5$  (petroleum ether/ethyl acetate = 2:1).  $^1\text{H}$  NMR (400 MHz,  $\text{CDCl}_3$ )  $\delta$  7.39 – 7.35 (m, 3H), 7.29 – 7.24 (m, 2H), 4.30 – 4.19 (m, 4H), 2.92 – 2.89 (m, 2H), 2.72 – 2.68 (m, 2H), 2.51 – 2.47 (m, 4H), 2.02 – 1.90 (m, 2H), 1.76 – 1.75 (m, 4H), 1.46 – 1.42 (m, 6H).  $^{13}\text{C}$  NMR (100 MHz,  $\text{CDCl}_3$ )  $\delta$  210.3, 141.7, 128.6, 128.5, 126.1, 63.7 (d,  $J = 6.1$  Hz), 42.1, 42.0, 35.2, 30.7, 30.5, 30.4, 25.3, 22.7, 16.2 (d,  $J = 7.2$  Hz).  $^{31}\text{P}$  NMR (162 MHz,  $\text{CDCl}_3$ )  $\delta$  28.0. IR (neat):  $\nu_{\text{max}}$  ( $\text{cm}^{-1}$ ) 2933, 1711, 1163, 1019, 754, 573. HRMS (ESI) calcd for  $\text{C}_{18}\text{H}_{30}\text{O}_4\text{PS}$   $[\text{M}+\text{H}]^+$  373.1597, found 373.1606.

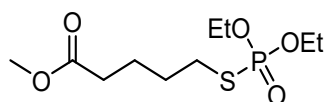

**Methyl 5-((diethoxyphosphoryl)thio)pentanoate (3ka)** Colorless oil (51.7 mg, 57%).  $R_f = 0.5$  (petroleum ether/ethyl acetate = 2:1).  $^1\text{H}$  NMR (400 MHz,  $\text{CDCl}_3$ )  $\delta$  4.22 – 4.09 (m, 4H), 3.66 (s, 3H), 2.86 – 2.80 (m, 2H), 2.34 – 2.31 (m, 2H), 1.74 – 1.70 (m, 4H), 1.35 (t,  $J = 7.2$  Hz, 6H).  $^{13}\text{C}$  NMR (100 MHz,  $\text{CDCl}_3$ )  $\delta$  173.8, 63.7 (d,  $J = 6.0$  Hz), 51.8, 33.5, 30.6 (d,  $J = 3.6$  Hz), 30.3 (d,  $J = 5.5$  Hz), 23.9, 16.2 (d,  $J = 7.5$  Hz).  $^{31}\text{P}$  NMR (162 MHz,  $\text{CDCl}_3$ )  $\delta$  28.0. IR (neat):  $\nu_{\text{max}}$  ( $\text{cm}^{-1}$ ) 2984, 1737, 1012, 750, 550. HRMS (ESI) calcd for  $\text{C}_{10}\text{H}_{22}\text{O}_5\text{PS}$   $[\text{M}+\text{H}]^+$  285.0920, found 285.0930.

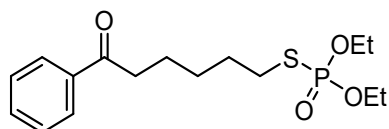

***O,O*-Diethyl *S*-(6-oxo-6-phenylhexyl) phosphorothioate (3la)** Colorless oil (39.3 mg, 57%).  $R_f = 0.3$  (petroleum ether/ethyl acetate = 2:1).  $^1\text{H}$  NMR (400 MHz,  $\text{CDCl}_3$ )  $\delta$  7.96 – 7.93 (m, 2H), 7.55 (t,  $J = 7.2$  Hz, 1H), 7.46 (t,  $J = 7.6$  Hz, 2H), 4.21 – 4.09 (m, 4H), 2.98 (t,  $J = 7.2$  Hz, 2H), 2.88 – 2.80 (m, 2H), 1.80 – 1.71 (m, 4H), 1.53 – 1.47 (m, 2H), 1.35 (t,  $J = 6.8$  Hz, 6H).  $^{13}\text{C}$  NMR (100 MHz,  $\text{CDCl}_3$ )  $\delta$  200.2, 137.1, 133.1, 128.7, 128.1, 77.4, 63.6 (d,  $J = 5.9$  Hz), 38.4, 30.8 (d,  $J = 5.2$  Hz), 28.3, 23.7, 16.2 (d,  $J = 7.2$  Hz).  $^{31}\text{P}$  NMR (162 MHz,  $\text{CDCl}_3$ )  $\delta$  28.2. IR (neat):  $\nu_{\text{max}}$  ( $\text{cm}^{-1}$ ) 2933, 1683, 1019, 966, 759, 573. HRMS (ESI) calcd for  $\text{C}_{16}\text{H}_{26}\text{O}_4\text{PS}$   $[\text{M}+\text{H}]^+$  345.1284 found 345.1289.

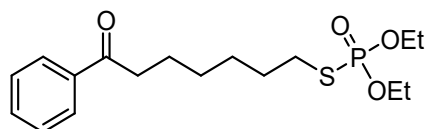

***O,O*-Diethyl *S*-(7-oxo-7-phenylheptyl) phosphorothioate (3ma)** Colorless oil (52.7 mg, 74%).  $R_f = 0.3$  (petroleum ether/ethyl acetate = 2:1).  $^1\text{H}$  NMR (400 MHz,  $\text{CDCl}_3$ )  $\delta$  7.94 – 7.92 (m, 2H), 7.53 (t,  $J = 7.2$  Hz, 1H), 7.44 (t,  $J = 7.6$  Hz, 2H), 4.19 – 4.08 (m, 4H), 2.95 (t,  $J = 7.2$  Hz, 2H), 2.85 – 2.77 (m, 2H), 1.76 – 1.65 (m, 4H), 1.43 – 1.38 (m, 4H), 1.33 (t,  $J = 6.8$  Hz, 6H).  $^{13}\text{C}$  NMR (100 MHz,  $\text{CDCl}_3$ )  $\delta$  200.3, 137.0, 133.0, 128.7, 128.1, 63.5 (d,  $J = 5.9$  Hz), 38.4, 30.9 (d,  $J = 3.9$  Hz), 30.7 (d,  $J = 5.7$  Hz), 28.8, 28.5, 24.1,

16.2 (d,  $J = 7.2$  Hz).  $^{31}\text{P}$  NMR (162 MHz,  $\text{CDCl}_3$ )  $\delta$  28.2. IR (neat):  $\nu_{\text{max}}$  ( $\text{cm}^{-1}$ ) 2933, 1683, 1019, 966, 756, 572. HRMS (ESI) calcd for  $\text{C}_{17}\text{H}_{28}\text{O}_4\text{PS}$   $[\text{M}+\text{H}]^+$  359.1440, found 359.1444.

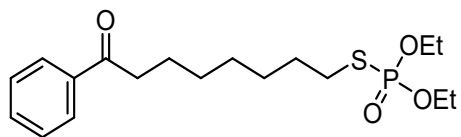

***O,O*-Diethyl *S*-(8-oxo-8-phenyloctyl) phosphorothioate (3na)** Colorless oil (56.5 mg, 76%).  $R_f = 0.3$  (petroleum ether/ethyl acetate = 2:1).  $^1\text{H}$  NMR (400 MHz,  $\text{CDCl}_3$ )  $\delta$  7.96 – 7.93 (m, 2H), 7.55 (t,  $J = 7.6$  Hz, 1H), 7.45 (t,  $J = 8.0$  Hz, 2H), 4.18 – 4.12 (m, 4H), 2.96 (t,  $J = 7.6$  Hz, 2H), 2.85 – 2.78 (m, 2H), 1.75 – 1.67 (m, 4H), 1.44 – 1.38 (m, 3H), 1.35 (t,  $J = 7.6$  Hz, 9H).  $^{13}\text{C}$  NMR (100 MHz,  $\text{CDCl}_3$ )  $\delta$  200.5, 137.1, 133.0, 128.7, 128.1, 63.6 (d,  $J = 5.8$  Hz), 38.6, 31.0 (d,  $J = 3.7$  Hz), 30.8 (d,  $J = 5.7$  Hz), 29.3, 29.0, 28.5, 24.3, 16.2 (d,  $J = 7.4$  Hz).  $^{31}\text{P}$  NMR (162 MHz,  $\text{CDCl}_3$ )  $\delta$  28.3. IR (neat):  $\nu_{\text{max}}$  ( $\text{cm}^{-1}$ ) 2924, 1685, 1249, 1019, 760, 573. HRMS (ESI) calcd for  $\text{C}_{18}\text{H}_{30}\text{O}_4\text{PS}$   $[\text{M}+\text{H}]^+$  373.1597, found 373.1617.

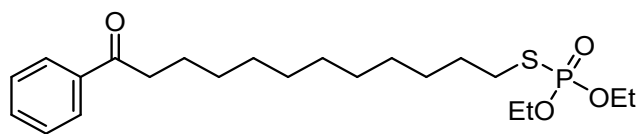

***O,O*-Diethyl *S*-(12-oxo-12-phenyldodecyl) phosphorothioate (3oa)** Colorless oil (70.2 mg, 82%).  $R_f = 0.3$  (petroleum ether/ethyl acetate = 2:1).  $^1\text{H}$  NMR (400 MHz,  $\text{CDCl}_3$ )  $\delta$  7.97 – 7.95 (m, 2H), 7.57 – 7.52 (m, 1H), 7.48 – 7.44 (m, 2H), 4.23 – 4.08 (m, 4H), 2.96 (t,  $J = 7.2$  Hz, 2H), 2.86 – 2.78 (m, 2H), 1.76 – 1.64 (m, 6H), 1.39 – 1.33 (td,  $J = 7.2, 0.8$  Hz, 12H), 1.27 – 1.26 (m, 6H).  $^{13}\text{C}$  NMR (100 MHz,  $\text{CDCl}_3$ )  $\delta$  200.7, 137.1, 133.0, 128.6, 128.1, 68.1, 63.5 (d,  $J = 5.9$  Hz), 38.7, 31.0 (d,  $J = 3.8$  Hz), 30.9 (d,  $J = 5.7$  Hz), 29.55, 29.52, 29.4, 29.1, 28.6, 25.7, 24.4, 16.2 (d,  $J = 7.2$  Hz).  $^{31}\text{P}$  NMR (162 MHz,  $\text{CDCl}_3$ )  $\delta$  28.1. IR (neat):  $\nu_{\text{max}}$  ( $\text{cm}^{-1}$ ) 2926, 1684, 1019, 755, 572. HRMS (ESI) calcd for  $\text{C}_{22}\text{H}_{38}\text{O}_4\text{PS}$   $[\text{M}+\text{H}]^+$  429.2223, found 429.2234.

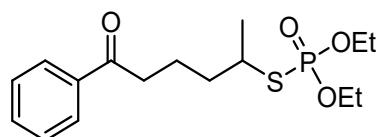

***O,O*-Diethyl *S*-(6-oxo-6-phenylhexan-2-yl) phosphorothioate (3pa)** Colorless oil (64.0 mg, 93%).  $R_f = 0.3$  (petroleum ether/ethyl acetate = 2:1).  $^1\text{H}$  NMR (400 MHz,  $\text{CDCl}_3$ )  $\delta$  7.58 – 7.94 (m, 2H), 7.55 (t,  $J = 7.2$  Hz, 1H), 7.53 (t,  $J = 7.2$  Hz, 2H), 4.22 – 4.07 (m, 4H), 3.43 – 3.35 (m, 1H), 3.00 (td,  $J = 7.2, 2.4$  Hz, 2H), 1.92 – 1.86 (m, 2H), 1.80 – 1.71 (m, 2H), 1.46 (d,  $J = 6.8$  Hz, 3H), 1.34 (td,  $J = 6.8, 2.4$  Hz, 6H).  $^{13}\text{C}$  NMR (100 MHz,  $\text{CDCl}_3$ )  $\delta$  199.9, 137.0, 133.2, 128.7, 128.1, 63.6 (d,  $J = 3.4$  Hz), 42.9 (d,  $J = 3.6$  Hz), 38.04, 37.97, 23.6 (d,  $J = 4.6$  Hz), 21.6, 16.2 (d,  $J = 7.3$  Hz).  $^{31}\text{P}$  NMR (162 MHz,  $\text{CDCl}_3$ )  $\delta$  27.4. IR (neat):  $\nu_{\text{max}}$  ( $\text{cm}^{-1}$ ) 2928, 1684, 1019, 752, 575. HRMS (ESI) calcd for  $\text{C}_{16}\text{H}_{26}\text{O}_4\text{PS}$   $[\text{M}+\text{H}]^+$  345.1284, found 345.1291.

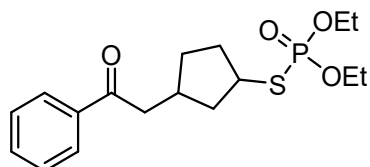

***O,O*-Diethyl *S*-(3-(2-oxo-2-phenylethyl)cyclopentyl) phosphorothioate (3qa)** Colorless oil (57.0 mg,

80%, 1:1 dr).  $R_f = 0.3$  (petroleum ether/ethyl acetate = 2:1).  $^1\text{H NMR}$  (400 MHz,  $\text{CDCl}_3$ )  $\delta$  7.93 (d,  $J = 7.6$  Hz, 2H), 7.56 (t,  $J = 6.8$  Hz, 1H), 7.45 (t,  $J = 7.6$  Hz, 2H), 4.20 – 4.09 (m, 4H), 3.67 – 3.58 (m, 0.5 H), 3.54 – 3.44 (m, 0.5 H), 3.06 (d,  $J = 6.0$  Hz, 1H), 3.01 (d,  $J = 6.8$  Hz, 1H), 2.75 – 2.68 (m, 0.5H), 2.54 – 2.46 (m, 1H), 2.23 – 1.58 (m, 5.5H), 1.35 (t,  $J = 6.8$  Hz, 6H).  $^{13}\text{C NMR}$  (100 MHz,  $\text{CDCl}_3$ )  $\delta$  199.5, 137.11, 137.08, 133.20, 133.19, 128.7, 128.2, 128.1, 63.62 (d,  $J = 2.5$  Hz), 63.57 (d,  $J = 2.9$  Hz), 44.9, 44.6, 44.0 (d,  $J = 3.4$  Hz), 43.7 (d,  $J = 3.5$  Hz), 42.3 (d,  $J = 7.0$  Hz), 41.5 (d, 6.3 Hz), 35.5 (d,  $J = 7.1$  Hz), 35.1, 34.7 (d,  $J = 6.3$  Hz), 34.1, 32.0, 31.2, 16.2 (d,  $J = 7.2$  Hz).  $\delta$   $^{31}\text{P NMR}$  (162 MHz,  $\text{CDCl}_3$ )  $\delta$  27.2, 27.0. IR (neat):  $\nu_{\text{max}}$  ( $\text{cm}^{-1}$ ) 2979, 1683, 1016, 754, 574. HRMS (ESI) calcd for  $\text{C}_{27}\text{H}_{26}\text{O}_4\text{PS}$   $[\text{M}+\text{H}]^+$  357.1284, found 357.1289.

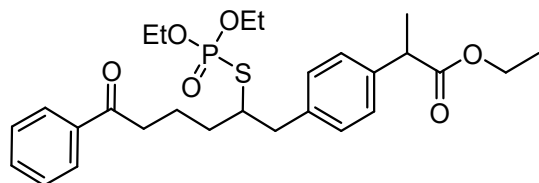

**Ethyl 2-(4-(2-((diethoxyphosphoryl)thio)-6-oxo-6-phenylhexyl)phenyl)propanoate (3ra)** Colorless oil (72.8 mg, 70%, 1:1 dr).  $R_f = 0.3$  (petroleum ether/ethyl acetate = 2:1).  $^1\text{H NMR}$  (400 MHz,  $\text{CDCl}_3$ )  $\delta$  7.94-7.92 (m, 2H), 7.55 (tt,  $J = 7.6, 0.8$  Hz, 1H), 7.45 (t,  $J = 7.6$  Hz, 2H), 7.20 (q,  $J = 9.6$  Hz, 4H), 4.16 – 4.05 (m, 3H), 4.01 – 3.91 (m, 3H), 3.71 (q,  $J = 7.2$  Hz, 1H), 3.54 – 3.64 (m, 1H), 3.05 – 2.91 (m, 4H), 2.07 – 1.97 (m, 1H), 1.87 – 1.72 (m, 3H), 1.46 (d,  $J = 7.2$  Hz, 3H), 1.28 (dt,  $J = 11.2, 6.8$  Hz, 6H), 1.20 (t,  $J = 7.2$  Hz, 3H).  $^{13}\text{C NMR}$  (100 MHz,  $\text{CDCl}_3$ )  $\delta$  199.9, 174.7, 139.1, 137.5, 137.0, 133.1, 129.8, 128.7, 128.1, 127.6, 63.6 (d,  $J = 6.4$  Hz), 63.5 (d,  $J = 2.6$  Hz), 60.8, 49.5 (d,  $J = 3.5$  Hz), 45.3, 42.7 (d,  $J = 1.4$  Hz), 38.2, 35.2 (d,  $J = 3.4$  Hz), 21.3, 18.8 (d,  $J = 2.9$  Hz), 16.2 (d,  $J = 4.1$  Hz), 16.1 (d,  $J = 3.7$  Hz), 14.3.  $^{31}\text{P NMR}$  (162 MHz,  $\text{CDCl}_3$ )  $\delta$  27.8. IR (neat):  $\nu_{\text{max}}$  ( $\text{cm}^{-1}$ ) 2935, 1730, 1685, 1164, 1017, 792, 571. HRMS (ESI) calcd for  $\text{C}_{27}\text{H}_{38}\text{O}_6\text{PS}$   $[\text{M}+\text{H}]^+$  521.2121, found 521.2127.

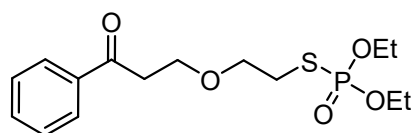

**O,O-Diethyl S-(2-(3-oxo-3-phenylpropoxy)ethyl) phosphorothioate (3sa)** Colorless oil (38.8 mg, 56%).  $R_f = 0.3$  (petroleum ether/ethyl acetate = 2:1).  $^1\text{H NMR}$  (400 MHz,  $\text{CDCl}_3$ )  $\delta$  7.95-7.93 (m, 2H), 7.55 (t,  $J = 7.2$  Hz, 1H), 7.44 (t,  $J = 7.6$  Hz, 2H), 4.22 – 4.07 (m, 4H), 3.89 (t,  $J = 6.4$  Hz, 2H), 3.69 (t,  $J = 6.4$  Hz, 2H), 3.23 (t,  $J = 6.4$  Hz, 2H), 3.01 – 2.94 (m, 2H), 1.33 (t,  $J = 6.8$  Hz, 6H).  $^{13}\text{C NMR}$  (100 MHz,  $\text{CDCl}_3$ )  $\delta$  198.2, 136.9, 133.3, 128.7, 128.2, 70.4 (d,  $J = 4.7$  Hz), 66.3, 63.7 (d,  $J = 5.9$  Hz), 38.7, 30.3 (d,  $J = 3.7$  Hz), 16.1 (d,  $J = 7.1$  Hz).  $^{31}\text{P NMR}$  (162 MHz,  $\text{CDCl}_3$ )  $\delta$  28.2. IR (neat):  $\nu_{\text{max}}$  ( $\text{cm}^{-1}$ ) 2983, 1683, 1249, 1110, 964, 789, 570. HRMS (ESI) calcd for  $\text{C}_5\text{H}_{23}\text{O}_5\text{PSNa}$   $[\text{M}+\text{Na}]^+$  369.0896, found 369.0907.

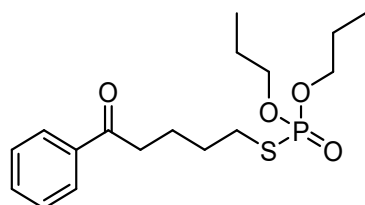

**S-(5-Oxo-5-phenylpentyl) O,O-dipropyl phosphorothioate (3ab)** Colorless oil (58.0 mg, 81%).  $R_f = 0.3$  (petroleum ether/ethyl acetate = 3:1).  $^1\text{H NMR}$  (400 MHz,  $\text{CDCl}_3$ )  $\delta$  7.95 (dd,  $J = 8.0, 1.2$  Hz, 2H), 7.56 (tt,  $J = 6.4, 1.2$  Hz, 1H), 7.46 (tt,  $J = 7.6, 1.6$  Hz, 2H), 4.11 – 3.98 (m, 4H), 3.01 (t,  $J = 6.8$  Hz, 2H),

2.92 – 2.85 (m, 2H), 1.85 – 1.80 (m, 2H), 1.75 – 1.70 (m, 4H), 1.28 – 1.22 (m, 2H), 0.97 (t,  $J = 7.2$  Hz, 6H).  $^{13}\text{C}$  NMR (100 MHz,  $\text{CDCl}_3$ )  $\delta$  199.8, 137.0, 133.2, 128.8, 128.2, 69.2 (d,  $J = 6.4$  Hz), 37.9, 30.7 (d,  $J = 3.9$  Hz), 30.6 (d,  $J = 5.4$  Hz), 23.7 (d,  $J = 7.2$  Hz), 23.2, 10.2.  $^{31}\text{P}$  NMR (162 MHz,  $\text{CDCl}_3$ )  $\delta$  28.2. IR (neat):  $\nu_{\text{max}}$  ( $\text{cm}^{-1}$ ) 2925, 1685, 1247, 733, 574. HRMS (ESI) calcd for  $\text{C}_{17}\text{H}_{27}\text{O}_4\text{PSNa}$   $[\text{M}+\text{Na}]^+$  381.1260, found 381.1265.

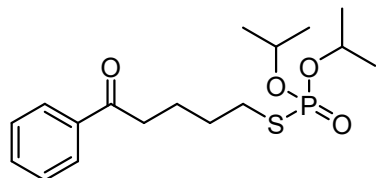

***O,O*-Diisopropyl *S*-(5-oxo-5-phenylpentyl) phosphorothioate (3ac)** Colorless oil (54.4 mg, 76%).  $R_f = 0.3$  (petroleum ether/ethyl acetate = 3:1).  $^1\text{H}$  NMR (400 MHz,  $\text{CDCl}_3$ )  $\delta$  7.94 (t,  $J = 7.2$  Hz, 2H), 7.56 (t,  $J = 7.2$  Hz, 1H), 7.46 (t,  $J = 7.6$  Hz, 2H), 4.77 – 4.79 (m, 2H), 3.00 (t,  $J = 6.4$  Hz, 2H), 2.92 – 2.85 (m, 2H), 1.88 – 1.78 (m, 4H), 1.37–1.33 (m, 12H).  $^{13}\text{C}$  NMR (100 MHz,  $\text{CDCl}_3$ )  $\delta$  199.8, 136.9, 133.2, 128.8, 128.1, 72.7 (d,  $J = 6.3$  Hz), 37.9, 30.9 (d,  $J = 3.9$  Hz), 30.4 (d,  $J = 6.0$  Hz), 24.0 (d,  $J = 4.0$  Hz), 23.8 (d,  $J = 5.4$  Hz), 23.2.  $^{31}\text{P}$  NMR (162 MHz,  $\text{CDCl}_3$ )  $\delta$  25.5. IR (neat):  $\nu_{\text{max}}$  ( $\text{cm}^{-1}$ ) 2929, 1685, 1104, 769, 609. HRMS (ESI) calcd for  $\text{C}_{17}\text{H}_{28}\text{O}_4\text{PS}$   $[\text{M}+\text{H}]^+$  359.1440, found 359.1450.

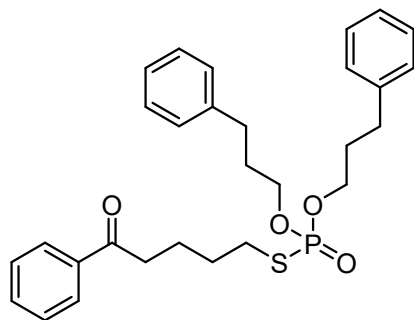

***S*-(5-Oxo-5-phenylpentyl) *O,O*-bis(3-phenylpropyl) phosphorothioate (3ad)** Colorless oil (85.7 mg, 84%).  $R_f = 0.3$  (petroleum ether/ethyl acetate = 3:1).  $^1\text{H}$  NMR (400 MHz,  $\text{CDCl}_3$ )  $\delta$  7.95 – 7.93 (m, 2H), 7.56 (tt,  $J = 7.2, 1.6$  Hz, 1H), 7.47 – 7.43 (m, 2H), 7.30 – 7.26 (m, 4H), 7.20 – 7.17 (m, 6H), 4.18 – 4.04 (m, 4H), 2.99 (t,  $J = 6.4$  Hz, 2H), 2.94 – 2.87 (m, 2H), 2.73 (t,  $J = 7.2$  Hz, 4H), 2.07 – 1.99 (m, 4H), 1.90 – 1.77 (m, 4H).  $^{13}\text{C}$  NMR (100 MHz,  $\text{CDCl}_3$ )  $\delta$  199.6, 141.0, 136.9, 133.2, 128.7, 128.56, 128.55, 128.1, 126.2, 66.9 (d,  $J = 6.4$  Hz), 53.6, 37.8, 31.8, 30.8 (d,  $J = 3.7$  Hz), 30.6 (d,  $J = 5.2$  Hz), 23.1.  $^{31}\text{P}$  NMR (162 MHz,  $\text{CDCl}_3$ )  $\delta$  28.9. IR (neat):  $\nu_{\text{max}}$  ( $\text{cm}^{-1}$ ) 2949, 1684, 1006, 796, 748, 573. HRMS (ESI) calcd for  $\text{C}_{29}\text{H}_{35}\text{O}_4\text{PSNa}$   $[\text{M}+\text{Na}]^+$  511.2066, found 511.2074.

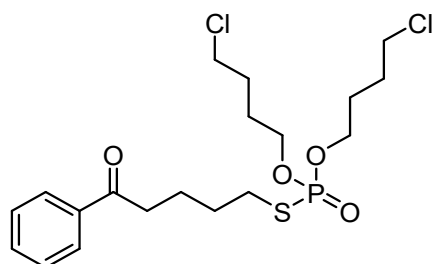

***O,O*-Bis(4-chlorobutyl) *S*-(5-oxo-5-phenylpentyl) phosphorothioate (3ae)** Colorless oil (57.2 mg, 63%).  $R_f = 0.3$  (petroleum ether/ethyl acetate = 3:1).  $^1\text{H}$  NMR (400 MHz,  $\text{CDCl}_3$ )  $\delta$  7.95 – 7.93 (m, 2H), 7.56 (t,  $J = 7.2$  Hz, 1H), 7.45 (t,  $J = 8.0$  Hz, 2H), 4.18 – 4.05 (m, 4H), 3.57 (t,  $J = 6.0$  Hz, 4H), 3.0 (d,  $J = 6.8$  Hz, 2H), 2.92 – 2.85 (m, 2H), 1.97 – 1.79 (m, 12H).  $^{13}\text{C}$  NMR (100 MHz,  $\text{CDCl}_3$ )  $\delta$  199.6, 136.9,



133.2, 128.8, 128.1, 77.4, 66.7 (d,  $J = 6.1$  Hz), 44.5, 37.8, 30.9 (d,  $J = 3.8$  Hz), 30.6 (d,  $J = 5.2$  Hz), 28.8, 27.6 (d,  $J = 7.2$  Hz), 23.1.  $^{31}\text{P}$  NMR (162 MHz,  $\text{CDCl}_3$ )  $\delta$  29.0. IR (neat):  $\nu_{\text{max}}$  ( $\text{cm}^{-1}$ ) 2956, 1683, 1180, 846, 736, 574. HRMS (ESI) calcd for  $\text{C}_{19}\text{H}_{30}\text{Cl}_2\text{O}_4\text{PS}$   $[\text{M}+\text{H}]^+$  455.0974, found 455.0982.

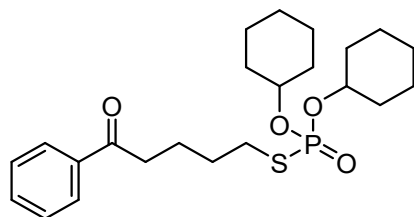

***O,O*-Dicyclohexyl *S*-(5-oxo-5-phenylpentyl) phosphorothioate (3af)** Colorless oil (67.4 mg, 77%).  $R_f = 0.3$  (petroleum ether/ethyl acetate = 3:1).  $^1\text{H}$  NMR (400 MHz,  $\text{CDCl}_3$ )  $\delta$  7.95 (dd,  $J = 8.0, 0.8$  Hz, 2H), 7.56 (tt,  $J = 6.8, 1.2$  Hz, 1H), 7.46 (tt,  $J = 8.0, 1.2$  Hz, 2H), 4.49 – 4.40 (m, 2H), 3.00 (t,  $J = 6.4$  Hz, 2H), 2.92 – 2.85 (m, 2H), 1.98 – 1.92 (m, 4H), 1.86 – 1.80 (m, 3H), 1.75 – 1.73 (m, 4H), 1.61 – 1.47 (m, 6H), 1.39 – 1.19 (m, 7H).  $^{13}\text{C}$  NMR (100 MHz,  $\text{CDCl}_3$ )  $\delta$  199.8, 137.0, 133.2, 128.7, 128.1, 37.9, 33.7 (d,  $J = 3.6$  Hz), 33.5 (d,  $J = 4.7$  Hz), 30.9 (d,  $J = 3.8$  Hz), 30.4 (d,  $J = 6.0$  Hz), 25.3, 23.7, 23.3.  $^{31}\text{P}$  NMR (162 MHz,  $\text{CDCl}_3$ )  $\delta$  25.5. IR (neat):  $\nu_{\text{max}}$  ( $\text{cm}^{-1}$ ) 2933, 1686, 1250, 790, 609. HRMS (ESI) calcd for  $\text{C}_{23}\text{H}_{35}\text{O}_4\text{PSNa}$   $[\text{M}+\text{Na}]^+$  461.1886, found 461.1894.

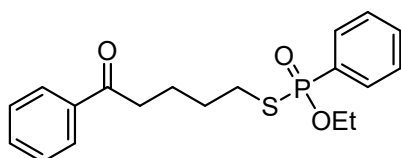

***O*-Ethyl *S*-(5-oxo-5-phenylpentyl) phenylphosphonothioate (3ag)** Colorless oil (55.0 mg, 76%).  $R_f = 0.3$  (petroleum ether/ethyl acetate = 3:1).  $^1\text{H}$  NMR (400 MHz,  $\text{CDCl}_3$ )  $\delta$  7.92 – 7.84 (m, 4H), 7.57 – 7.43 (m, 6H), 4.28 – 4.21 (m, 2H), 2.91 (t,  $J = 1.6$  Hz, 2H), 2.82 – 2.75 (m, 2H), 1.80 – 1.64 (m, 4H), 1.39 (t,  $J = 6.8$  Hz, 3H).  $^{13}\text{C}$  NMR (100 MHz,  $\text{CDCl}_3$ )  $\delta$  199.7, 136.9, 133.2, 132.6 (d,  $J = 2.1$  Hz), 131.3, 131.2, 128.7, 128.6, 128.1, 62.3 (d,  $J = 6.6$  Hz), 37.8, 30.3 (d,  $J = 3.2$  Hz), 30.2 (d,  $J = 1.7$  Hz), 23.0, 16.5 (d,  $J = 6.6$  Hz).  $^{31}\text{P}$  NMR (162 MHz,  $\text{CDCl}_3$ )  $\delta$  45.2. IR (neat):  $\nu_{\text{max}}$  ( $\text{cm}^{-1}$ ) 2932, 1683, 1022, 749, 597. HRMS (ESI) calcd for  $\text{C}_{19}\text{H}_{23}\text{O}_3\text{PSNa}$   $[\text{M}+\text{Na}]^+$  385.0998, found 385.1007.

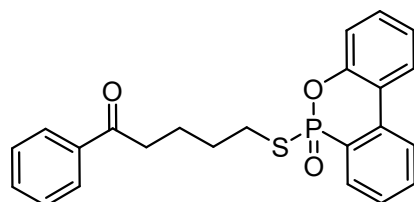

**5-((6-Oxidodibenzo[*c,e*][1,2]oxaphosphinin-6-yl)thio)-1-phenylpentan-1-one (3ah)** Colorless oil (35.1 mg, 43%).  $R_f = 0.3$  (petroleum ether/ethyl acetate = 3:1).  $^1\text{H}$  NMR (400 MHz,  $\text{CDCl}_3$ )  $\delta$  8.02 – 7.90 (m, 5H), 7.70 (tt,  $J = 7.6, 1.2$  Hz, 1H), 7.57 – 7.49 (m, 2H), 7.47 – 7.43 (m, 2H), 7.40 – 7.35 (m, 1H), 7.29 – 7.28 (m, 1H), 7.25 – 7.21 (m, 1H), 2.97 – 2.87 (m, 4H), 1.79 – 1.76 (m, 4H).  $^{13}\text{C}$  NMR (100 MHz,  $\text{CDCl}_3$ )  $\delta$  199.7, 149.6 (d,  $J = 9.3$  Hz), 136.9, 136.2 (d,  $J = 7.5$  Hz), 133.9 (d,  $J = 1.8$  Hz), 133.2, 130.9, 130.6 (d,  $J = 10.8$  Hz), 128.8, 128.7, 128.1, 126.6, 125.3, 125.1, 124.0 (d,  $J = 11.0$  Hz), 122.4 (d,  $J = 12.1$  Hz), 120.6 (d,  $J = 6.6$  Hz), 37.7, 30.5 (d,  $J = 4.6$  Hz), 29.9 (d,  $J = 3.2$  Hz), 23.0.  $^{31}\text{P}$  NMR (162 MHz,  $\text{CDCl}_3$ )  $\delta$  38.9. IR (neat):  $\nu_{\text{max}}$  ( $\text{cm}^{-1}$ ) 2925, 1682, 1234, 1116, 755, 578. HRMS (ESI) calcd for  $\text{C}_{23}\text{H}_{21}\text{O}_3\text{PSNa}$   $[\text{M}+\text{Na}]^+$  431.0841, found 431.0849.

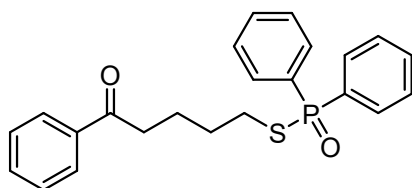

**S-(5-Oxo-5-phenylpentyl) diphenylphosphinothioate (3ai)** Colorless oil (35.5 mg, 45%).  $R_f = 0.3$  (petroleum ether/ethyl acetate = 3:1).  $^1\text{H NMR}$  (400 MHz,  $\text{CDCl}_3$ )  $\delta$  7.91 – 7.85 (m, 6H), 7.56 – 7.42 (m, 9H), 2.91 – 2.81 (m, 4H), 1.80 – 1.73 (m, 4H).  $^{13}\text{C NMR}$  (100 MHz,  $\text{CDCl}_3$ )  $\delta$  199.8, 136.9, 133.1, 132.4 (d,  $J = 2.9$  Hz), 131.6, 131.5, 128.9, 128.7 (d,  $J = 5.1$  Hz), 128.1, 37.7, 30.2 (d,  $J = 4.6$  Hz), 29.2 (d,  $J = 1.7$  Hz), 23.1.  $^{31}\text{P NMR}$  (162 MHz,  $\text{CDCl}_3$ )  $\delta$  43.5. IR (neat):  $\nu_{\text{max}}$  ( $\text{cm}^{-1}$ ) 2927, 1683, 1288, 1114, 723, 568. HRMS (ESI) calcd for  $\text{C}_{23}\text{H}_{23}\text{O}_2\text{PSNa}$   $[\text{M}+\text{Na}]^+$  417.1049, found 417.1057.

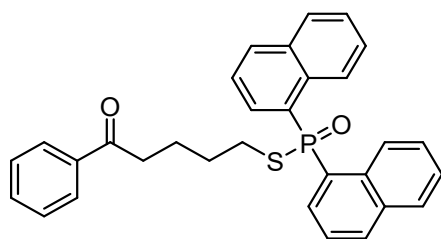

**S-(5-Oxo-5-phenylpentyl) di(naphthalen-1-yl)phosphinothioate (3aj)** Colorless oil (41.5 mg, 42%).  $R_f = 0.3$  (petroleum ether/ethyl acetate = 3:1).  $^1\text{H NMR}$  (400 MHz,  $\text{CDCl}_3$ )  $\delta$  8.85 – 8.83 (m, 2H), 8.11 – 8.01 (m, 4H), 7.92 – 7.87 (m, 4H), 7.54 – 7.44 (m, 9H), 3.11 – 3.04 (m, 2H), 2.93 – 2.89 (m, 2H), 1.84 – 1.80 (m, 4H).  $^{13}\text{C NMR}$  (100 MHz,  $\text{CDCl}_3$ )  $\delta$  199.8, 136.9, 134.1 (d,  $J = 9.9$  Hz), 133.9, 133.3 (d,  $J = 12.3$  Hz), 133.2, 133.1, 130.1, 129.0, 128.7, 128.1, 127.5, 127.1 (d,  $J = 4.6$  Hz), 126.7, 124.6 (d,  $J = 5.2$  Hz), 37.8, 30.3 (d,  $J = 4.3$  Hz), 29.9 (d,  $J = 1.2$  Hz), 23.2.  $^{31}\text{P NMR}$  (162 MHz,  $\text{CDCl}_3$ )  $\delta$  48.2. IR (neat):  $\nu_{\text{max}}$  ( $\text{cm}^{-1}$ ) 2928, 1682, 1268, 1025, 735, 573. HRMS (ESI) calcd for  $\text{C}_{31}\text{H}_{28}\text{O}_2\text{PS}$   $[\text{M}+\text{H}]^+$  495.1542, found 495.1548.

## 10. Characterizations of Products 5

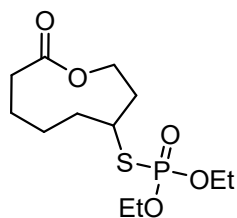

***O,O*-Diethyl *S*-(9-oxooxonan-4-yl) phosphorothioate (5aa)** Colorless oil (25.4 mg, 41%).  $R_f = 0.3$  (petroleum ether/ethyl acetate = 4:1).  $^1\text{H NMR}$  (400 MHz,  $\text{CDCl}_3$ )  $\delta$  4.40 – 4.27 (m, 2H), 4.20 – 4.07 (m, 4H), 3.52 – 3.46 (m, 1H), 2.34 – 2.23 (m, 3H), 2.19 – 2.11 (m, 1H), 1.82 – 1.77 (m, 3H), 1.72 – 1.60 (m, 3H), 1.34 (t,  $J = 6.8$  Hz, 6H).  $^{13}\text{C NMR}$  (100 MHz,  $\text{CDCl}_3$ )  $\delta$  174.7, 63.8 (d,  $J = 3.6$  Hz), 63.7 (d,  $J = 3.7$  Hz), 62.6, 43.9 (d,  $J = 3.8$  Hz), 35.2 (d,  $J = 5.7$  Hz), 34.1, 24.4, 21.7, 16.2 (d,  $J = 7.3$  Hz).  $^{31}\text{P NMR}$  (162 MHz,  $\text{CDCl}_3$ )  $\delta$  27.0. IR (neat):  $\nu_{\text{max}}$  ( $\text{cm}^{-1}$ ) 2928, 1731, 1444, 1013, 793. HRMS (ESI) calcd for  $\text{C}_{12}\text{H}_{23}\text{O}_5\text{PSNa}$   $[\text{M}+\text{Na}]^+$  333.0896, found 333.0908.

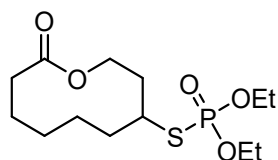

***O,O*-Diethyl *S*-(10-oxooxecan-4-yl) phosphorothioate (5ba)** Colorless oil (44.7 mg, 69%).  $R_f = 0.3$  (petroleum ether/ethyl acetate = 4:1).  $^1\text{H NMR}$  (400 MHz,  $\text{CDCl}_3$ )  $\delta$  4.45 – 4.40 (m, 1H), 4.30 – 4.26 (m, 1H), 4.19 – 4.06 (m, 4H), 3.63 – 3.56 (m, 1H), 2.36 – 2.28 (m, 3H), 2.12 – 1.98 (m, 2H), 1.89 – 1.77 (m, 4H), 1.57 – 1.45 (m, 3H), 1.34 (t,  $J = 7.2$  Hz, 6H).  $^{13}\text{C NMR}$  (100 MHz,  $\text{CDCl}_3$ )  $\delta$  173.6, 63.8 (d,  $J = 3.7$  Hz), 63.7 (d,  $J = 3.7$  Hz), 62.6, 45.7 (d,  $J = 3.4$  Hz), 34.8, 32.2 (d,  $J = 7.5$  Hz), 31.0 (d,  $J = 3.8$  Hz), 27.3, 20.8, 20.5, 16.2 (d,  $J = 7.4$  Hz).  $^{31}\text{P NMR}$  (162 MHz,  $\text{CDCl}_3$ )  $\delta$  27.2. IR (neat):  $\nu_{\text{max}}$  ( $\text{cm}^{-1}$ ) 3454, 2958, 1445, 1016, 970, 790. HRMS (ESI) calcd for  $\text{C}_{13}\text{H}_{26}\text{O}_5\text{PS}$   $[\text{M}+\text{H}]^+$  325.1233, found 325.1241.

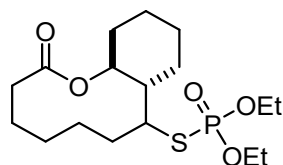

***O,O*-Diethyl *S*-((8a*S*,12a*S*)-2-oxododecahydro-2*H*-benzo[*b*]oxecin-8-yl) phosphorothioate (5ca)** Colorless oil (44.7 mg, 69%, 37:4:1 dr).  $R_f = 0.3$  (petroleum ether/ethyl acetate = 4:1).  $^1\text{H NMR}$  (400 MHz,  $\text{CDCl}_3$ )  $\delta$  4.55 – 4.49 (m, 1H), 4.20 – 4.02 (m, 4H), 3.06 – 2.78 (m, 1H), 2.50 – 2.44 (m, 1H), 2.40 – 2.44 (m, 1H), 2.28 – 2.21 (m, 1H), 2.04 – 1.98 (m, 2H), 1.92 – 1.85 (m, 1H), 1.75 – 1.60 (m, 7H), 1.51 – 1.47 (m, 1H), 1.32 (td,  $J = 7.2, 0.4$  Hz, 6H), 1.30 – 1.08 (m, 4H), 1.06 – 0.95 (m, 1H).  $^{13}\text{C NMR}$  (100 MHz,  $\text{CDCl}_3$ )  $\delta$  174.2, 63.6 (d,  $J = 6.5$  Hz), 63.5 (d,  $J = 6.6$  Hz), 53.5 (d,  $J = 2.9$  Hz), 45.8 (d,  $J = 5.8$  Hz), 35.0, 34.5, 33.0, 32.1, 26.6, 25.5, 24.7, 23.3, 21.9, 16.2 (d,  $J = 7.3$  Hz).  $^{31}\text{P NMR}$  (162 MHz,  $\text{CDCl}_3$ )  $\delta$  29.3, 28.8, 28.5. IR (neat):  $\nu_{\text{max}}$  ( $\text{cm}^{-1}$ ) 2933, 2860, 1449, 1154, 1017, 754. HRMS (ESI) calcd for  $\text{C}_{17}\text{H}_{32}\text{O}_5\text{PS}$   $[\text{M}+\text{H}]^+$  379.1703, found 379.1708.

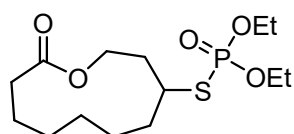

***O,O*-Diethyl *S*-(11-oxooxacycloundecan-4-yl) phosphorothioate (5da)** Colorless oil (37.9 mg, 56%).

$R_f = 0.3$  (petroleum ether/ethyl acetate = 4:1).  $^1\text{H NMR}$  (400 MHz,  $\text{CDCl}_3$ )  $\delta$  4.27 – 4.06 (m, 6H), 3.55 – 3.45 (m, 1H), 2.35 – 2.27 (m, 3H), 2.20 – 2.11 (m, 2H), 1.77 – 1.57 (m, 4H), 1.53 – 1.47 (m, 2H), 1.42 – 1.31 (m, 9H).  $^{13}\text{C NMR}$  (100 MHz,  $\text{CDCl}_3$ )  $\delta$  173.5, 63.8, 63.7 (d,  $J = 5.4$  Hz), 62.1, 45.1 (d,  $J = 3.4$  Hz), 35.3, 33.2 (d,  $J = 4.1$  Hz), 32.4 (d,  $J = 7.5$  Hz), 25.7, 24.6, 21.4, 20.6, 16.1 (d,  $J = 7.2$  Hz).  $^{31}\text{P NMR}$  (162 MHz,  $\text{CDCl}_3$ )  $\delta$  27.1. IR (neat):  $\nu_{\text{max}}$  ( $\text{cm}^{-1}$ ) 2935, 1730, 1443, 1156, 1016, 760. HRMS (ESI) calcd for  $\text{C}_{14}\text{H}_{27}\text{O}_5\text{PSNa}$   $[\text{M}+\text{Na}]^+$  361.1209, found 361.1214.

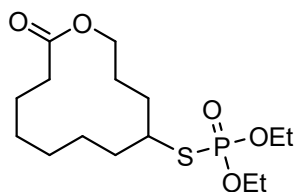

***O,O*-Diethyl *S*-(12-oxooxacyclododecan-4-yl) phosphorothioate (5ea)** Colorless oil (19.4 mg, 27%).  $R_f = 0.3$  (petroleum ether/ethyl acetate = 4:1).  $^1\text{H NMR}$  (400 MHz,  $\text{CDCl}_3$ )  $\delta$  4.53 – 4.48 (m, 1H), 4.22 – 4.11 (m, 4H), 4.01 – 3.95 (m, 1H), 3.57 – 3.49 (m, 1H), 2.46 – 2.31 (m, 2H), 2.04 – 1.94 (m, 2H), 1.82 – 1.71 (m, 5H), 1.64 – 1.53 (m, 3H), 1.47 – 1.43 (m, 2H), 1.36 (t,  $J = 6.8$  Hz, 8H).  $^{13}\text{C NMR}$  (100 MHz,  $\text{CDCl}_3$ )  $\delta$  173.8, 64.2, 63.6 (d,  $J = 5.7$  Hz), 44.7 (d,  $J = 3.5$  Hz), 34.1, 33.3 (d,  $J = 3.7$  Hz), 31.0 (d,  $J = 6.9$  Hz), 25.3, 24.7, 24.0, 23.6, 22.7, 16.2 (d,  $J = 7.3$  Hz).  $^{31}\text{P NMR}$  (162 MHz,  $\text{CDCl}_3$ )  $\delta$  28.5. IR (neat):  $\nu_{\text{max}}$  ( $\text{cm}^{-1}$ ) 2939, 1732, 1447, 1145, 1017, 791. HRMS (ESI) calcd for  $\text{C}_{15}\text{H}_{29}\text{O}_5\text{PSLi}$   $[\text{M}+\text{Li}]^+$  359.1628, found 359.1629.

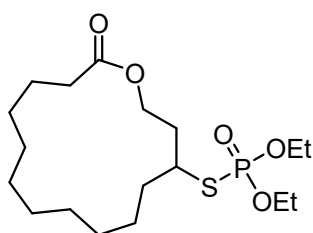

***O,O*-Diethyl *S*-(15-oxooxacyclopentadecan-4-yl) phosphorothioate (5fa)** Colorless oil (37.8 mg, 48%).  $R_f = 0.3$  (petroleum ether/ethyl acetate = 4:1).  $^1\text{H NMR}$  (400 MHz,  $\text{CDCl}_3$ )  $\delta$  4.33 – 4.27 (m, 1H), 4.20 – 4.08 (m, 5H), 3.37 – 3.29 (m, 1H), 2.35 – 2.31 (m, 2H), 2.15 – 2.04 (m, 3H), 1.83 – 1.76 (m, 1H), 1.68 – 1.61 (m, 3H), 1.59 – 1.42 (m, 3H), 1.34 (td,  $J = 7.2, 0.8$  Hz, 6H), 1.33 – 1.29 (m, 10H).  $^{13}\text{C NMR}$  (100 MHz,  $\text{CDCl}_3$ )  $\delta$  174.2, 63.7 (d,  $J = 2.6$  Hz), 63.6 (d,  $J = 3.0$  Hz), 61.9, 44.6 (d,  $J = 3.7$  Hz), 35.9 (d,  $J = 3.9$  Hz), 34.4 (d,  $J = 5.9$  Hz), 34.0, 27.6, 26.6, 26.42, 26.36, 26.2, 25.9, 25.2, 24.6, 16.2 (d,  $J = 7.2$  Hz).  $^{31}\text{P NMR}$  (162 MHz,  $\text{CDCl}_3$ )  $\delta$  26.9. IR (neat):  $\nu_{\text{max}}$  ( $\text{cm}^{-1}$ ) 2928, 2856, 1734, 1444, 1165, 1016, 793. HRMS (ESI) calcd for  $\text{C}_{18}\text{H}_{36}\text{O}_5\text{PS}$   $[\text{M}+\text{H}]^+$  395.2016, found 395.2024.

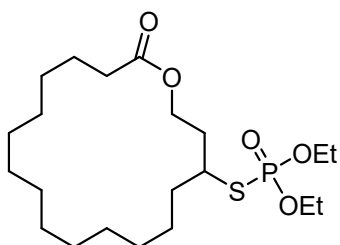

***O,O*-Diethyl *S*-(18-oxooxacyclooctadecan-4-yl) phosphorothioate (5ga)** Colorless oil (35.8 mg, 41%).  $R_f = 0.3$  (petroleum ether/ethyl acetate = 4:1).  $^1\text{H NMR}$  (400 MHz,  $\text{CDCl}_3$ )  $\delta$  4.35 – 4.29 (m, 1H), 4.22 – 4.08 (m, 5H), 3.38 – 3.29 (m, 1H), 2.30 (td,  $J = 7.6, 1.2$  Hz, 2H), 2.09 – 1.97 (m, 3H), 1.79 – 1.58 (m, 5H), 1.53 – 1.40 (m, 4H), 1.34 (t,  $J = 7.2$  Hz, 6H), 1.28 – 1.23 (m, 14H).  $^{13}\text{C NMR}$  (100 MHz,  $\text{CDCl}_3$ )  $\delta$

173.8, 63.7 (d,  $J = 6.4$  Hz), 61.6, 44.8 (d,  $J = 3.6$  Hz), 36.2 (d,  $J = 4.8$  Hz), 34.8 (d,  $J = 5.0$  Hz), 34.5, 27.9, 27.8, 27.7, 27.4, 27.1, 27.0, 26.84, 26.80, 26.6, 25.8, 24.6, 16.2 (d,  $J = 7.3$  Hz).  $^{31}\text{P}$  NMR (162 MHz,  $\text{CDCl}_3$ )  $\delta$  27.0. IR (neat):  $\nu_{\text{max}}$  ( $\text{cm}^{-1}$ ) 2926, 2855, 1735, 1460, 1247, 1017, 794. HRMS (ESI) calcd for  $\text{C}_{21}\text{H}_{42}\text{O}_5\text{PS}$   $[\text{M}+\text{H}]^+$  437.2485, found 437.2496.

## 11. Characterizations of Products 6aa and 7aa.

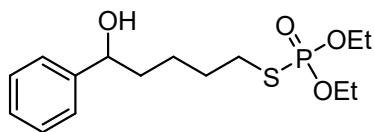

***O,O*-Diethyl *S*-(5-hydroxy-5-phenylpentyl) phosphorothioate (6aa)** Colorless oil (53.1 mg, 80%).  $R_f = 0.3$  (petroleum ether/ethyl acetate = 2:1).  $^1\text{H NMR}$  (400 MHz,  $\text{CDCl}_3$ )  $\delta$  7.34 – 7.32 (m, 4H), 7.29 – 7.26 (m, 1H), 4.68 – 4.65 (m, 1H), 4.19 – 4.06 (m, 4H), 2.84 – 2.77 (m, 2H), 2.25 – 2.02 (m, 1H), 1.86 – 1.68 (m, 4H), 1.59 – 1.38 (m, 2H), 1.34 (t,  $J = 6.8$  Hz, 6H).  $^{13}\text{C NMR}$  (100 MHz,  $\text{CDCl}_3$ )  $\delta$  144.9, 128.5, 127.6, 125.9, 74.2, 63.6 (d,  $J = 5.8$  Hz), 38.5, 30.7 (d,  $J = 3.2$  Hz), 30.6 (d,  $J = 1.7$  Hz), 24.8, 16.1 (d,  $J = 7.2$  Hz).  $^{31}\text{P NMR}$  (162 MHz,  $\text{CDCl}_3$ )  $\delta$  28.9. IR (neat):  $\nu_{\text{max}}$  ( $\text{cm}^{-1}$ ) 3410, 2984, 1239, 1016, 792. HRMS (ESI) calcd for  $\text{C}_{15}\text{H}_{26}\text{O}_4\text{PS}$   $[\text{M}+\text{H}]^+$  333.1284, found 333.1286.

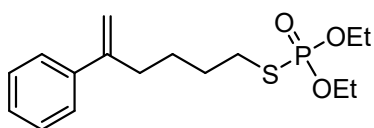

***O,O*-Diethyl *S*-(5-phenylhex-5-en-1-yl) phosphorothioate (7aa)** Colorless oil (53.8 mg, 82%).  $R_f = 0.3$  (petroleum ether/ethyl acetate = 2:1).  $^1\text{H NMR}$  (400 MHz,  $\text{CDCl}_3$ )  $\delta$  7.33 – 7.31 (m, 2H), 7.25 (t,  $J = 7.2$  Hz, 2H), 7.20 (t,  $J = 7.6$  Hz, 1H), 5.20 (d,  $J = 0.9$  Hz, 1H), 4.99 (d,  $J = 0.9$  Hz, 1H), 4.15 – 3.99 (m, 4H), 2.78 – 2.71 (m, 2H), 2.46 (t,  $J = 7.6$  Hz, 2H), 1.68 – 1.61 (m, 2H), 1.52 – 1.48 (m, 2H), 1.27 (t,  $J = 7.2$  Hz, 6H).  $^{13}\text{C NMR}$  (100 MHz,  $\text{CDCl}_3$ )  $\delta$  148.0, 141.0, 128.4, 127.5, 126.2, 112.8, 63.6 (d,  $J = 5.8$  Hz), 34.8, 30.8 (d,  $J = 3.8$  Hz), 30.5 (d,  $J = 5.5$  Hz), 27.1, 16.2 (d,  $J = 7.3$  Hz).  $^{31}\text{P NMR}$  (162 MHz,  $\text{CDCl}_3$ )  $\delta$  28.8. IR (neat):  $\nu_{\text{max}}$  ( $\text{cm}^{-1}$ ) 2983, 1258, 1018, 968, 753. HRMS (ESI) calcd for  $\text{C}_{16}\text{H}_{26}\text{O}_3\text{PS}$   $[\text{M}+\text{H}]^+$  329.1335, found 329.1334.

## 12. References

- 1 (a) S. Liu, M. Bai, P. F. Xu, Q. X. Sun, X. H. Duan, et al., Copper-catalyzed radical ring-opening halogenation with HX, *Chem Commun*, 2021, **57**, 8652-8655. (b) S. Liu, P. Ma, L. Zhang, S. Shen, H.-J. Miao, L. Liu, K. N. Houk, X.-H. Duan, L.-N. Guo, Cheap metal catalyzed ring expansion/cross-coupling cascade: A new route to functionalized medium-sized and macrolactones, *Chem. Sci.*, 2023, DOI: 10.1039/D2SC06157K
- 2 (a) N. Santschi and A. Togni, Electrophilic trifluoromethylation of S-hydrogen phosphorothioates, *J. Org. Chem*, 2011, **76**, 4189-4193. (b) M. J. Bodner, R. M. Phelan, M. F. Freeman, R. Li and C. A. Townsend, Non-heme iron oxygenases generate natural structural diversity in carbapenem antibiotics, *J. Am. Chem. Soc*, 2010, **132**, 12-13.

### 13. <sup>31</sup>P NMR, <sup>1</sup>H NMR and <sup>13</sup>C NMR Spectra of Starting Materials

<sup>1</sup>H NMR (400 MHz, CDCl<sub>3</sub>) and <sup>13</sup>C NMR (100 MHz, CDCl<sub>3</sub>) spectra of product **1s**

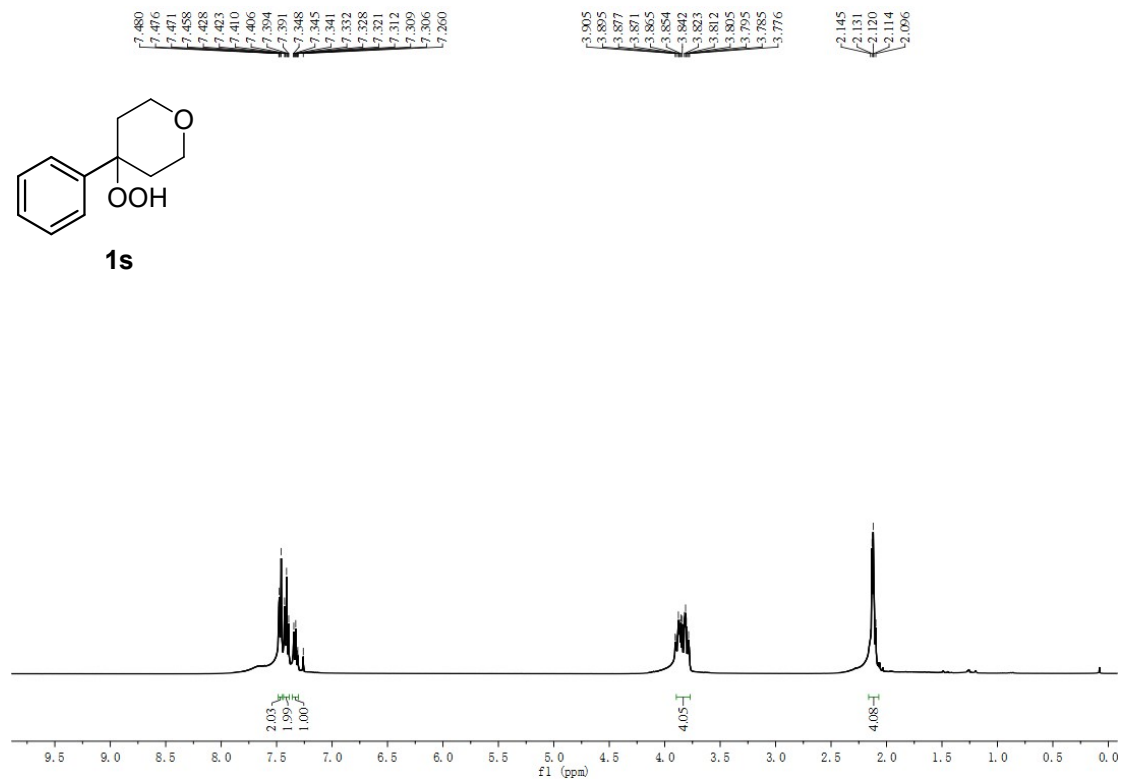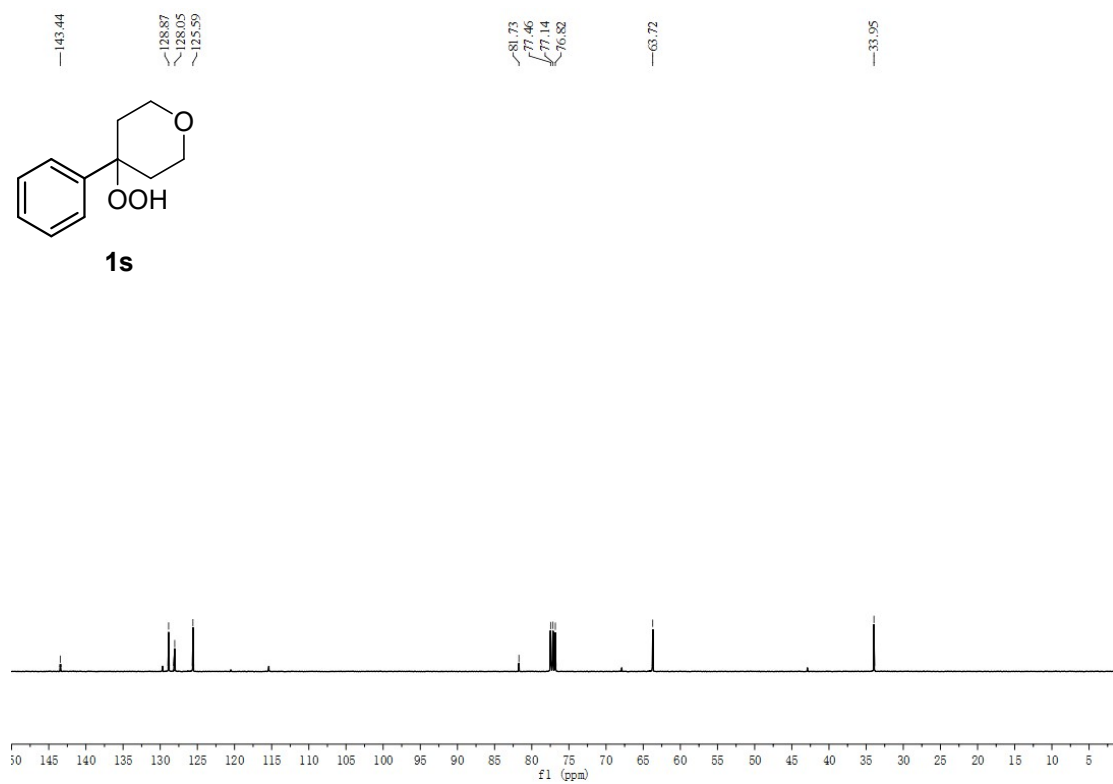



$^{31}\text{P}$  NMR (162 MHz,  $\text{CDCl}_3$ ),  $^1\text{H}$  NMR (400 MHz,  $\text{CDCl}_3$ ) and  $^{13}\text{C}$  NMR (100 MHz,  $\text{CDCl}_3$ ) spectra of product **2d**

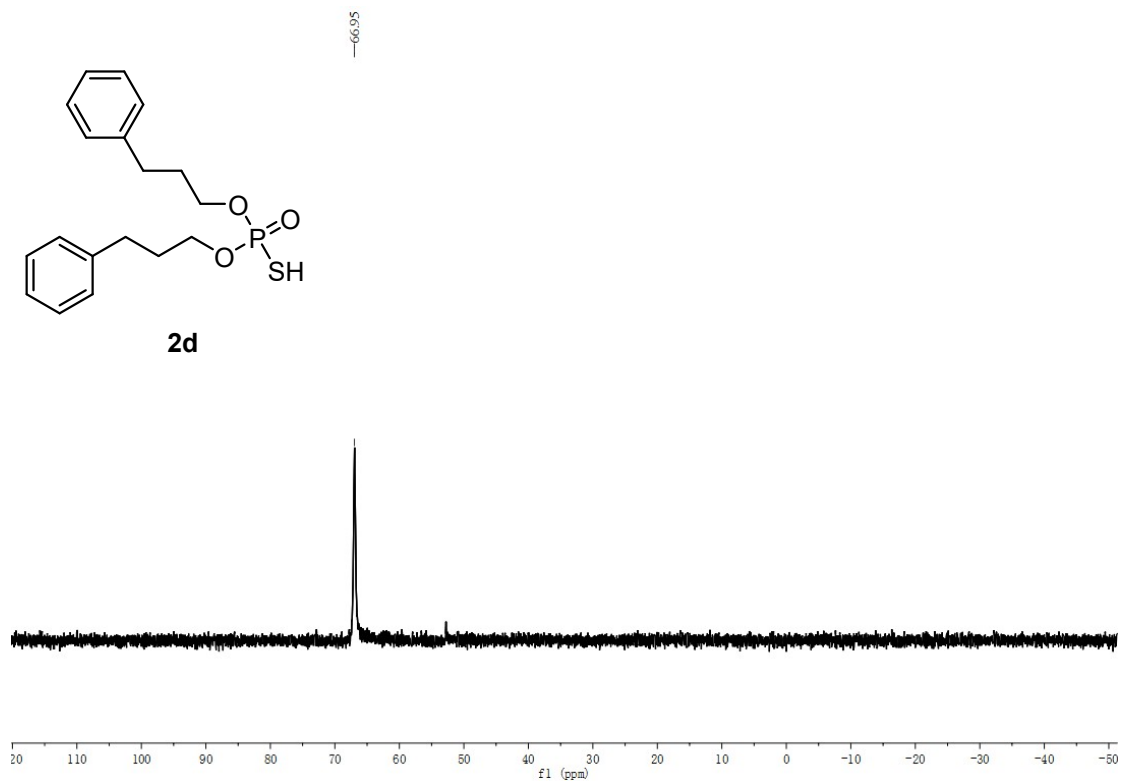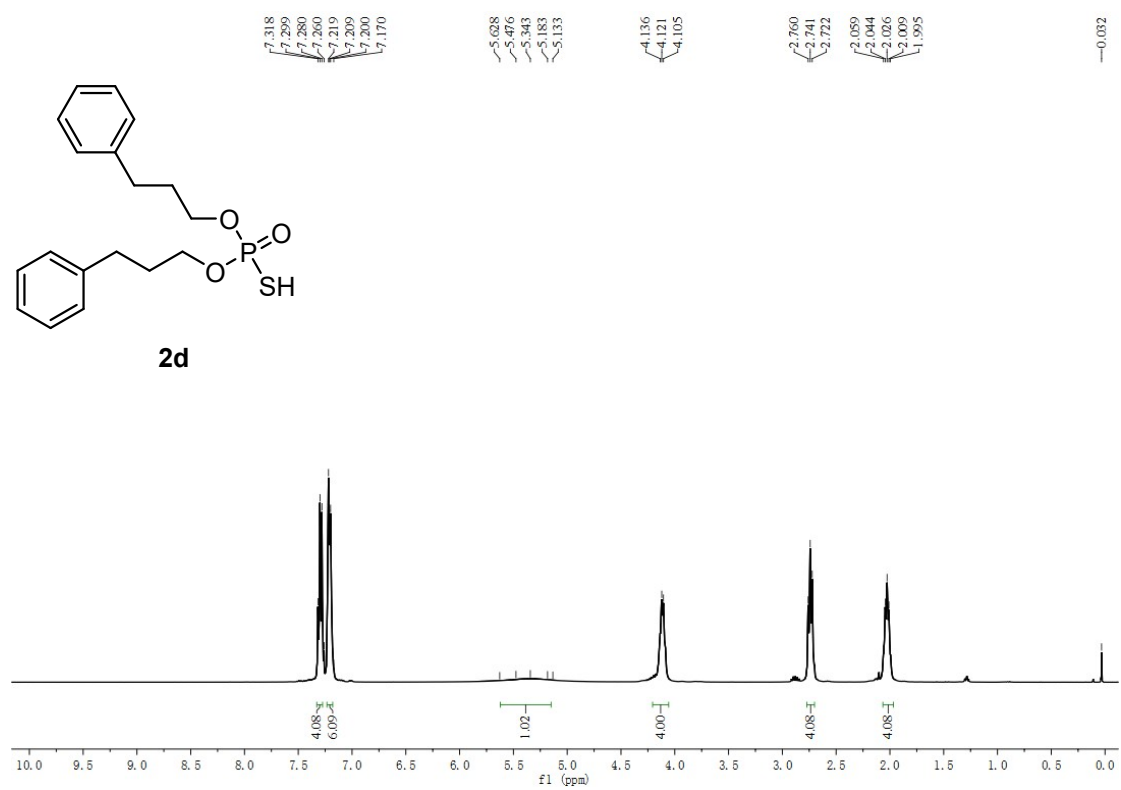

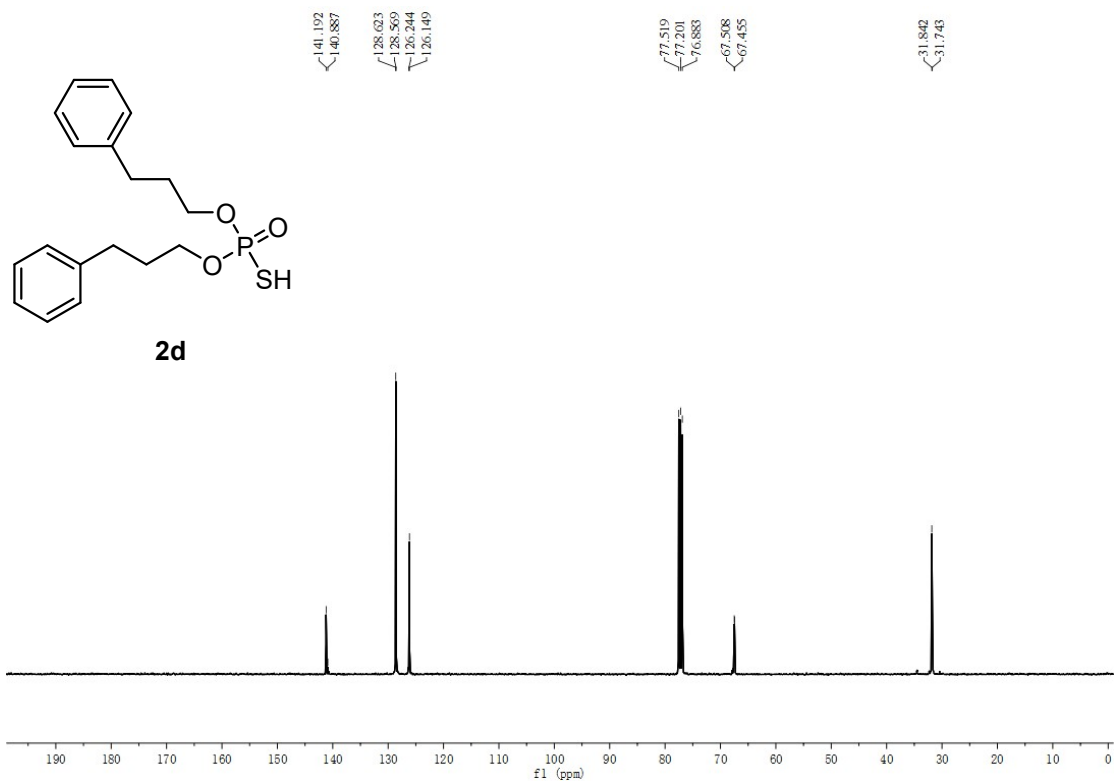

## 15. $^{31}\text{P}$ NMR, $^1\text{H}$ NMR and $^{13}\text{C}$ NMR Spectra of Products 3 and 5

$^{31}\text{P}$  NMR (162 MHz,  $\text{CDCl}_3$ ),  $^1\text{H}$  NMR (400 MHz,  $\text{CDCl}_3$ ) and  $^{13}\text{C}$  NMR (100 MHz,  $\text{CDCl}_3$ ) spectra of product **3aa**

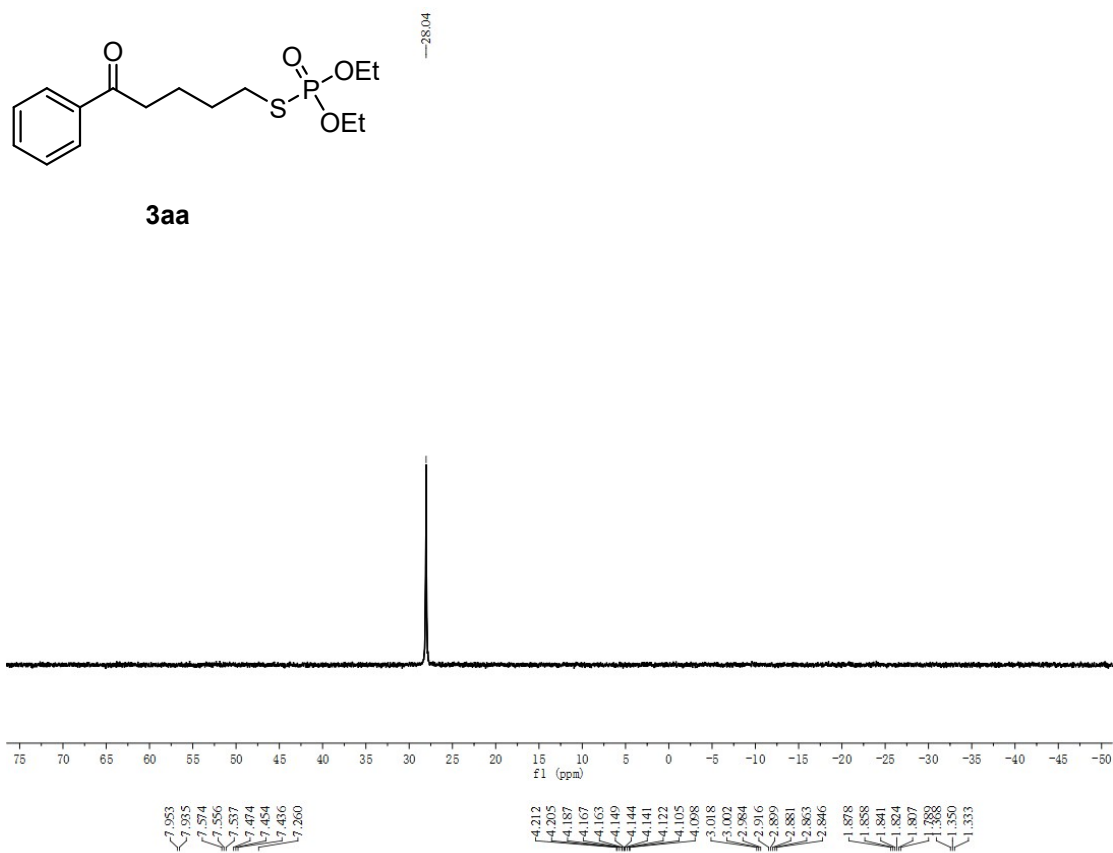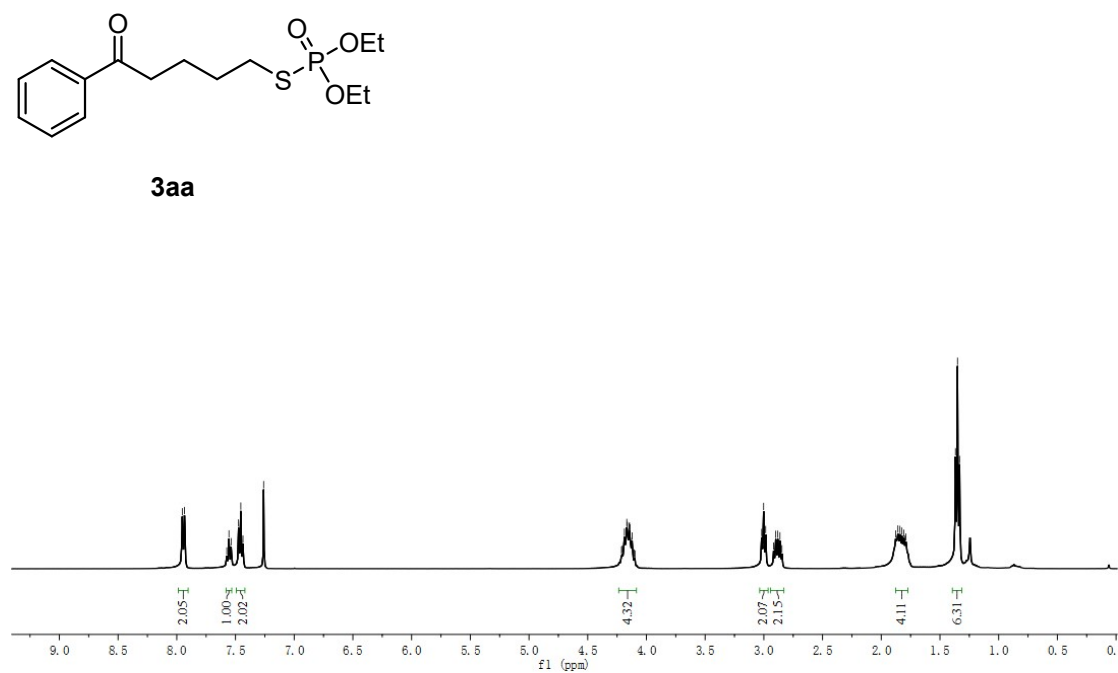

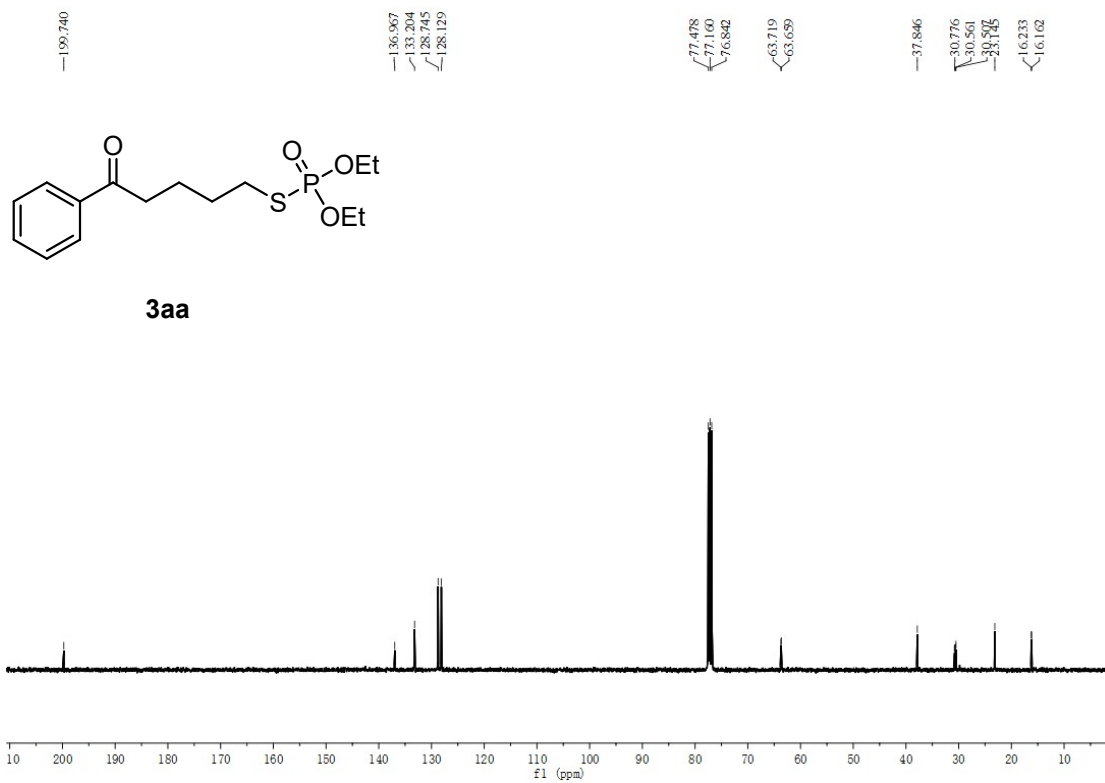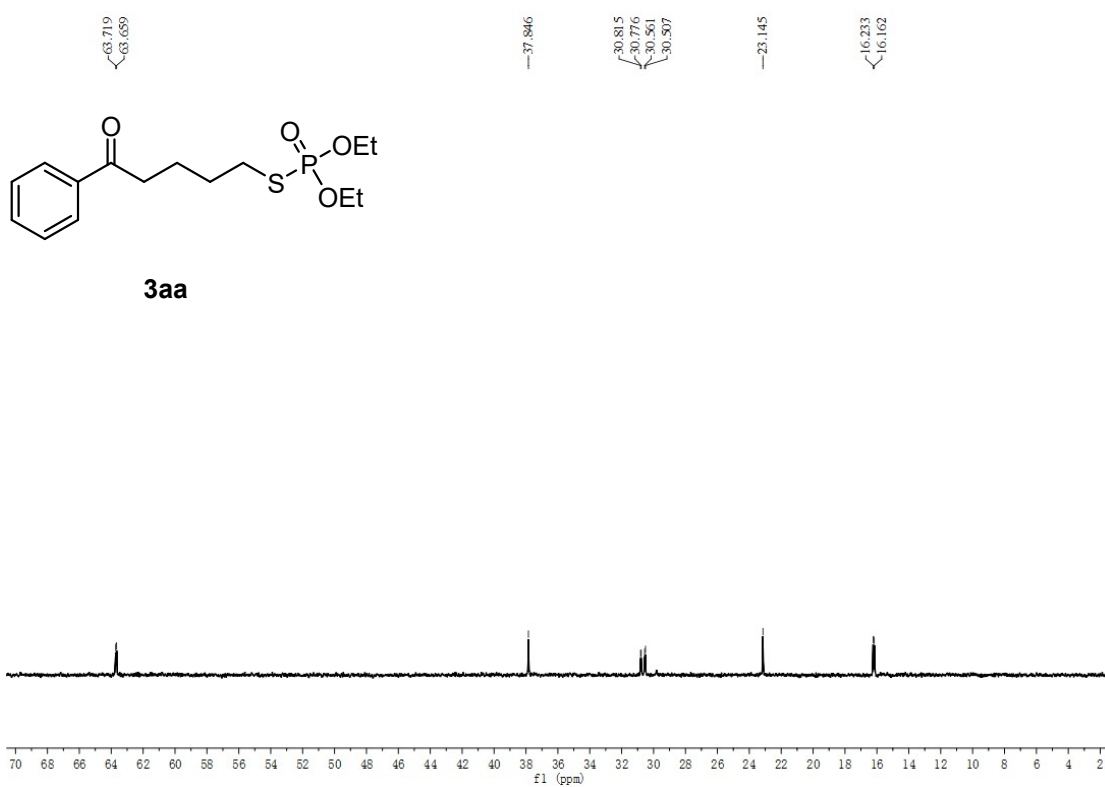

$^{31}\text{P}$  NMR (162 MHz,  $\text{CDCl}_3$ ),  $^1\text{H}$  NMR (400 MHz,  $\text{CDCl}_3$ ) and  $^{13}\text{C}$  NMR (100 MHz,  $\text{CDCl}_3$ ) spectra of product **3ba**

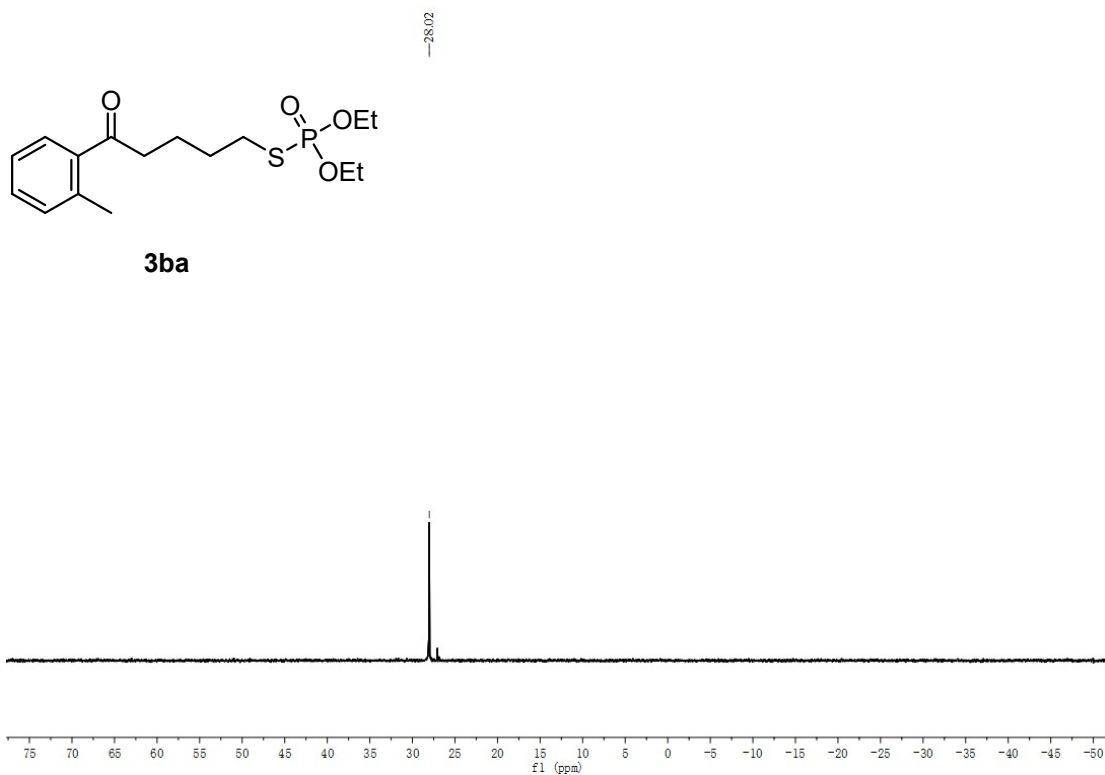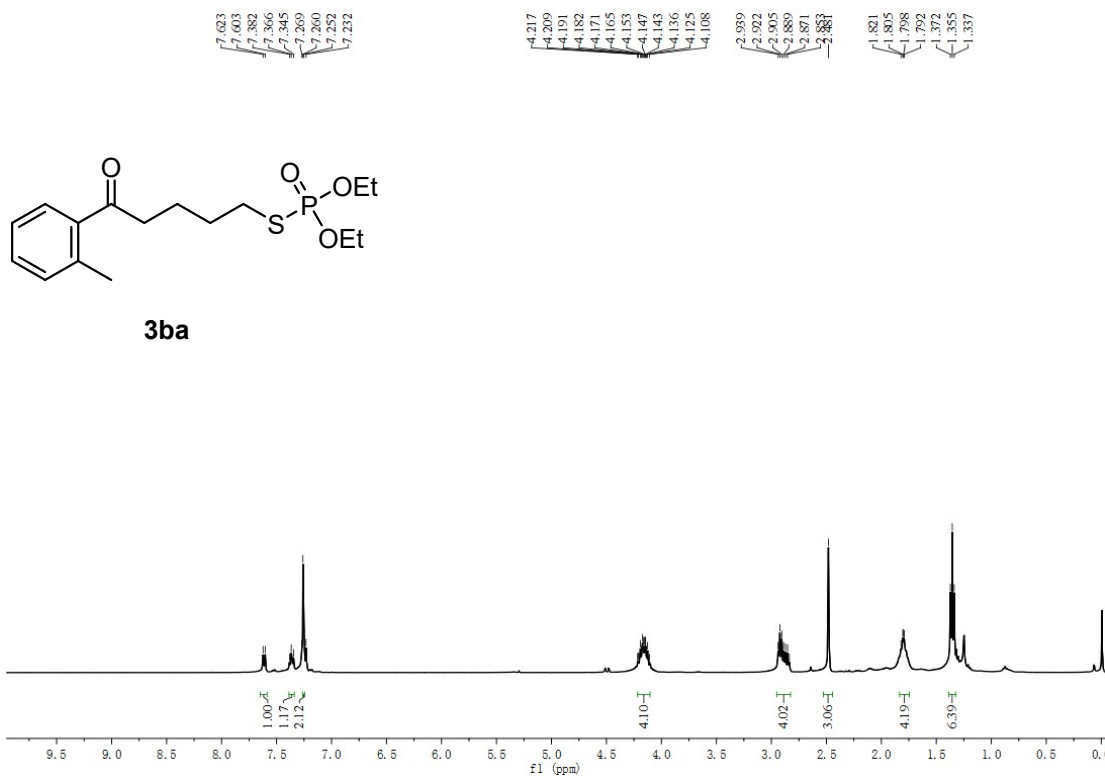

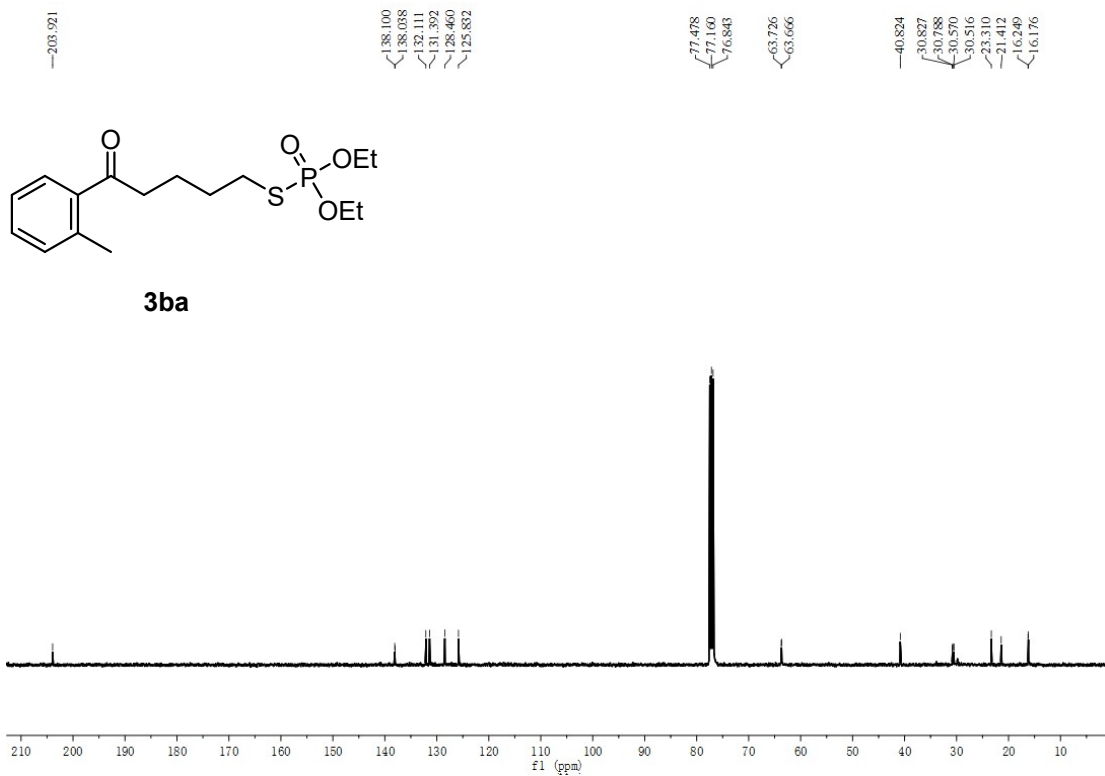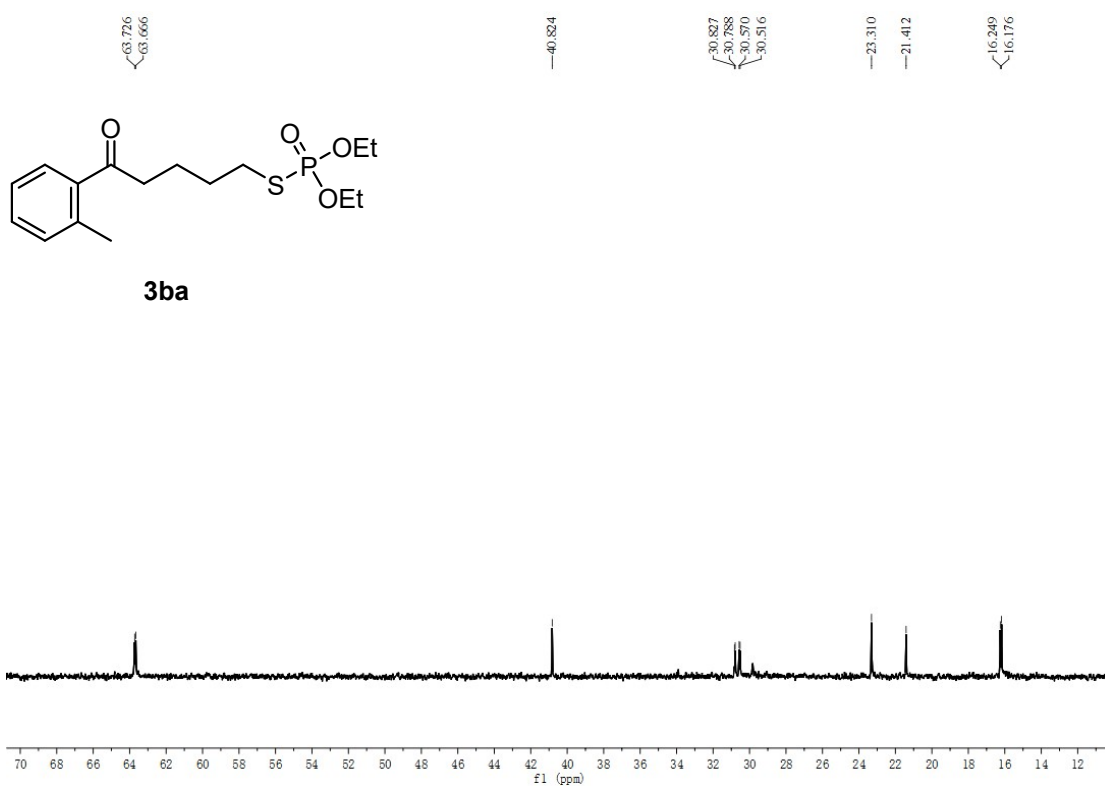

$^{31}\text{P}$  NMR (162 MHz,  $\text{CDCl}_3$ ),  $^1\text{H}$  NMR (400 MHz,  $\text{CDCl}_3$ ) and  $^{13}\text{C}$  NMR (100 MHz,  $\text{CDCl}_3$ ) spectra of product **3ca**

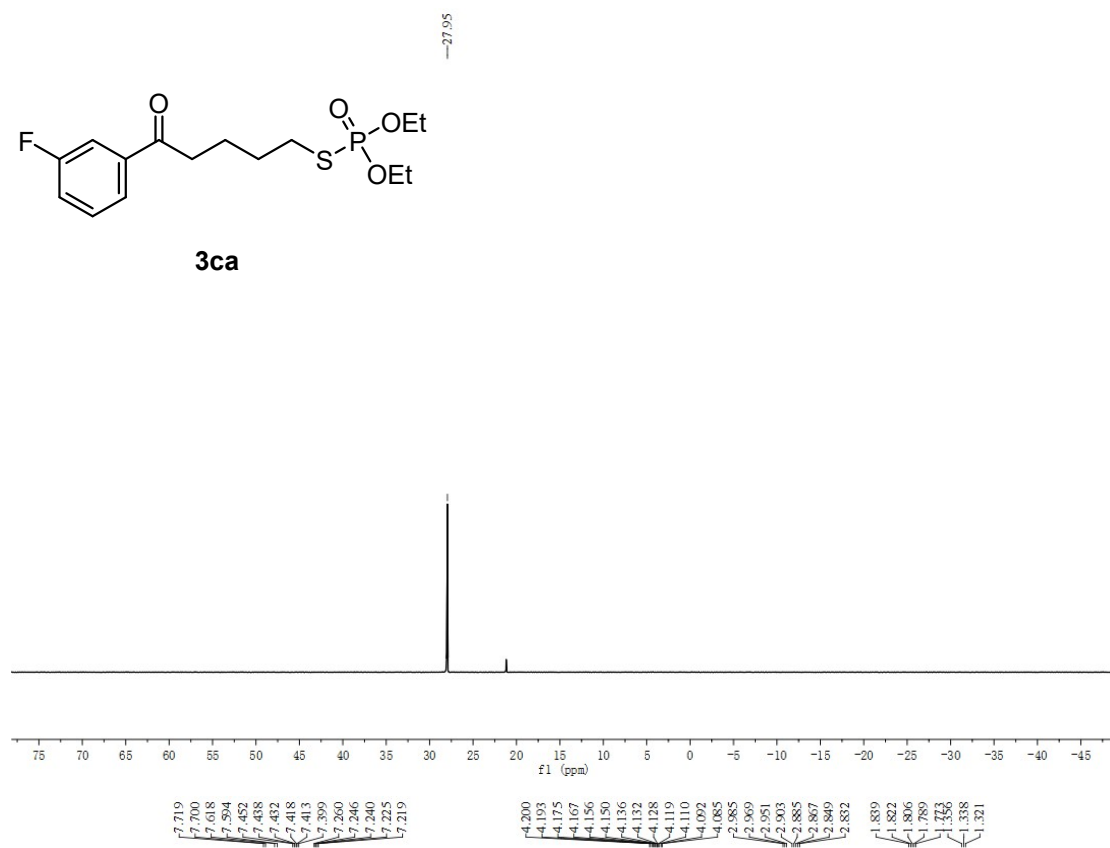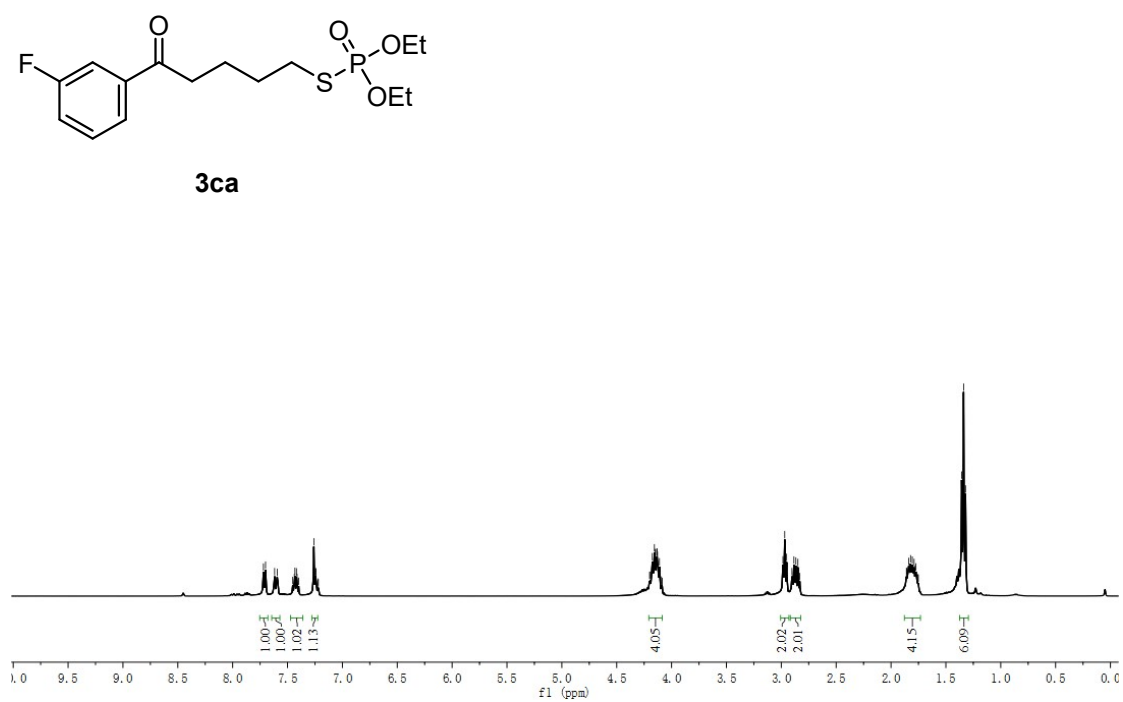

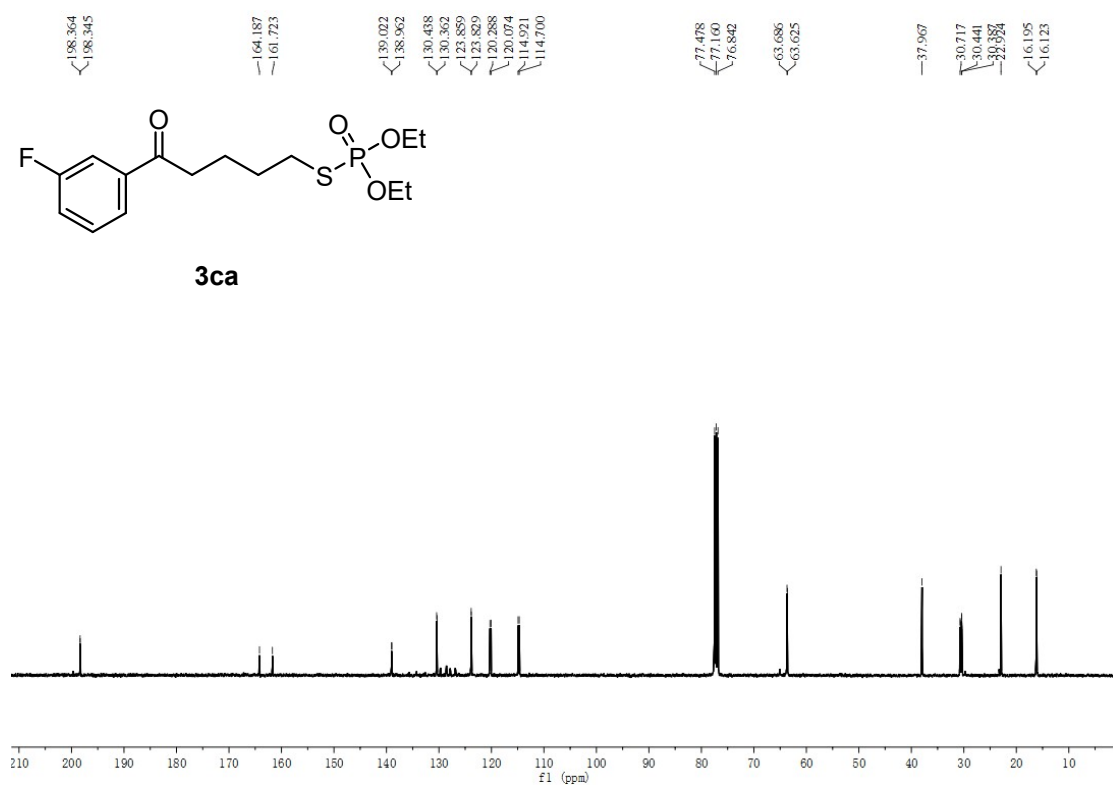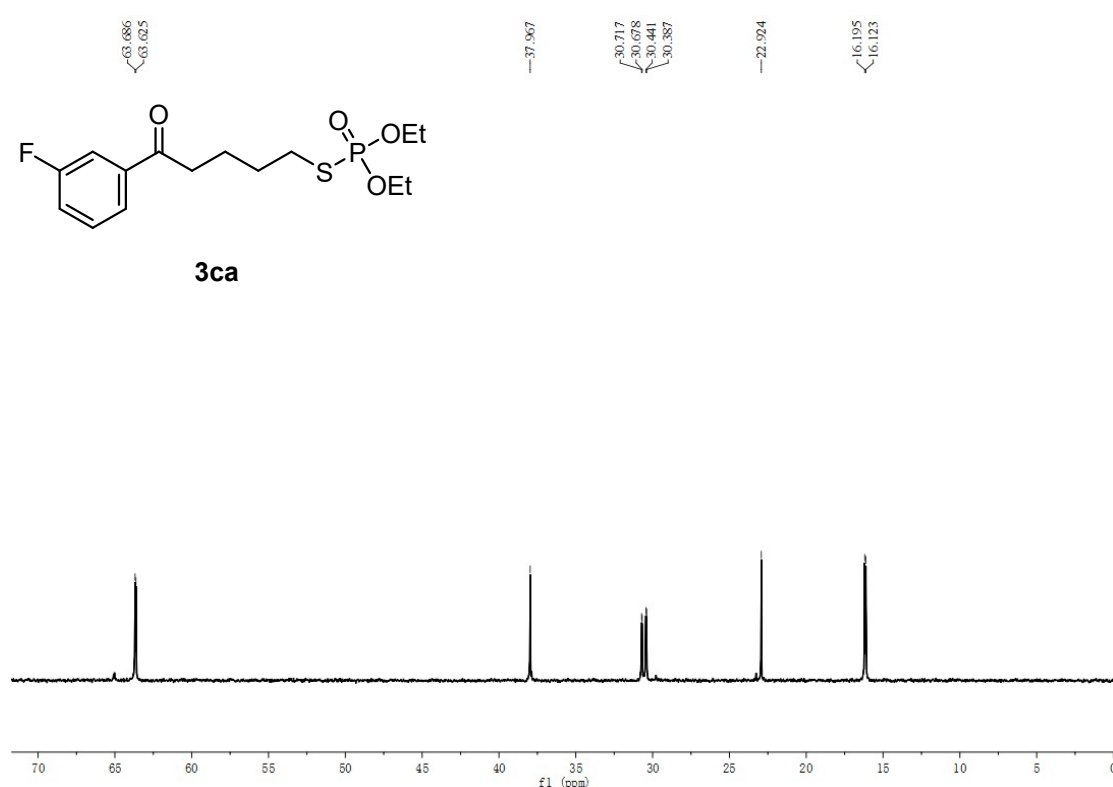



$^{31}\text{P}$  NMR (162 MHz,  $\text{CDCl}_3$ ),  $^1\text{H}$  NMR (400 MHz,  $\text{CDCl}_3$ ) and  $^{13}\text{C}$  NMR (100 MHz,  $\text{CDCl}_3$ ) spectra of product **3da**

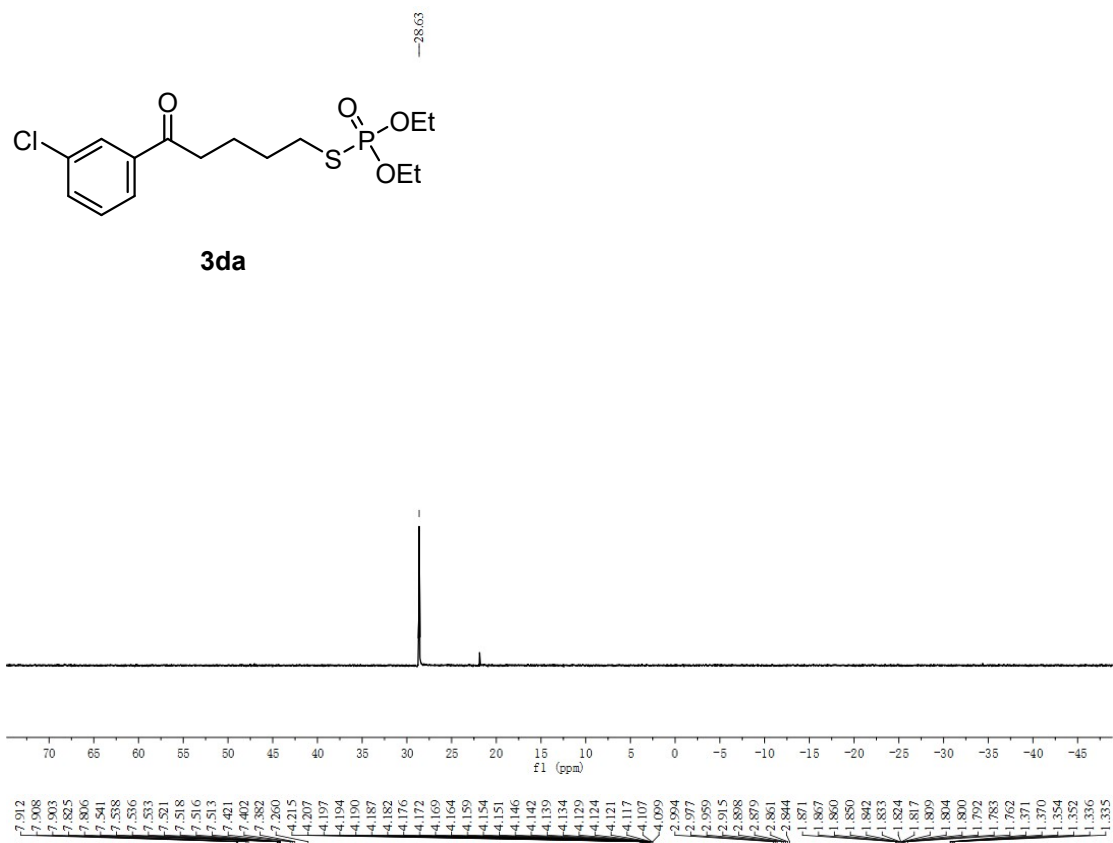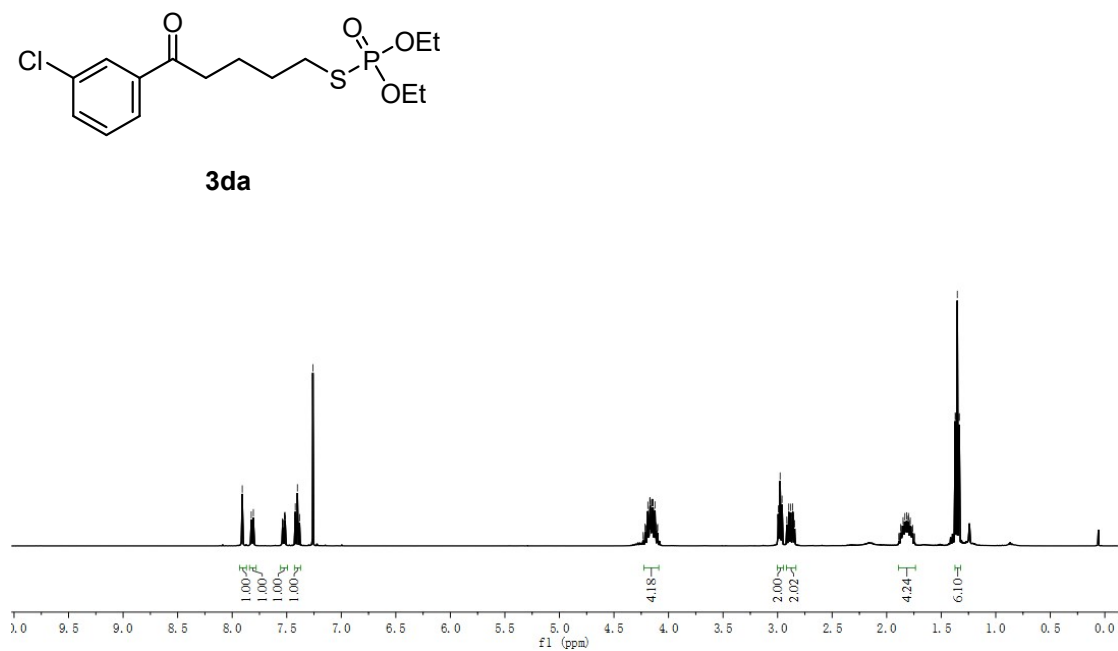

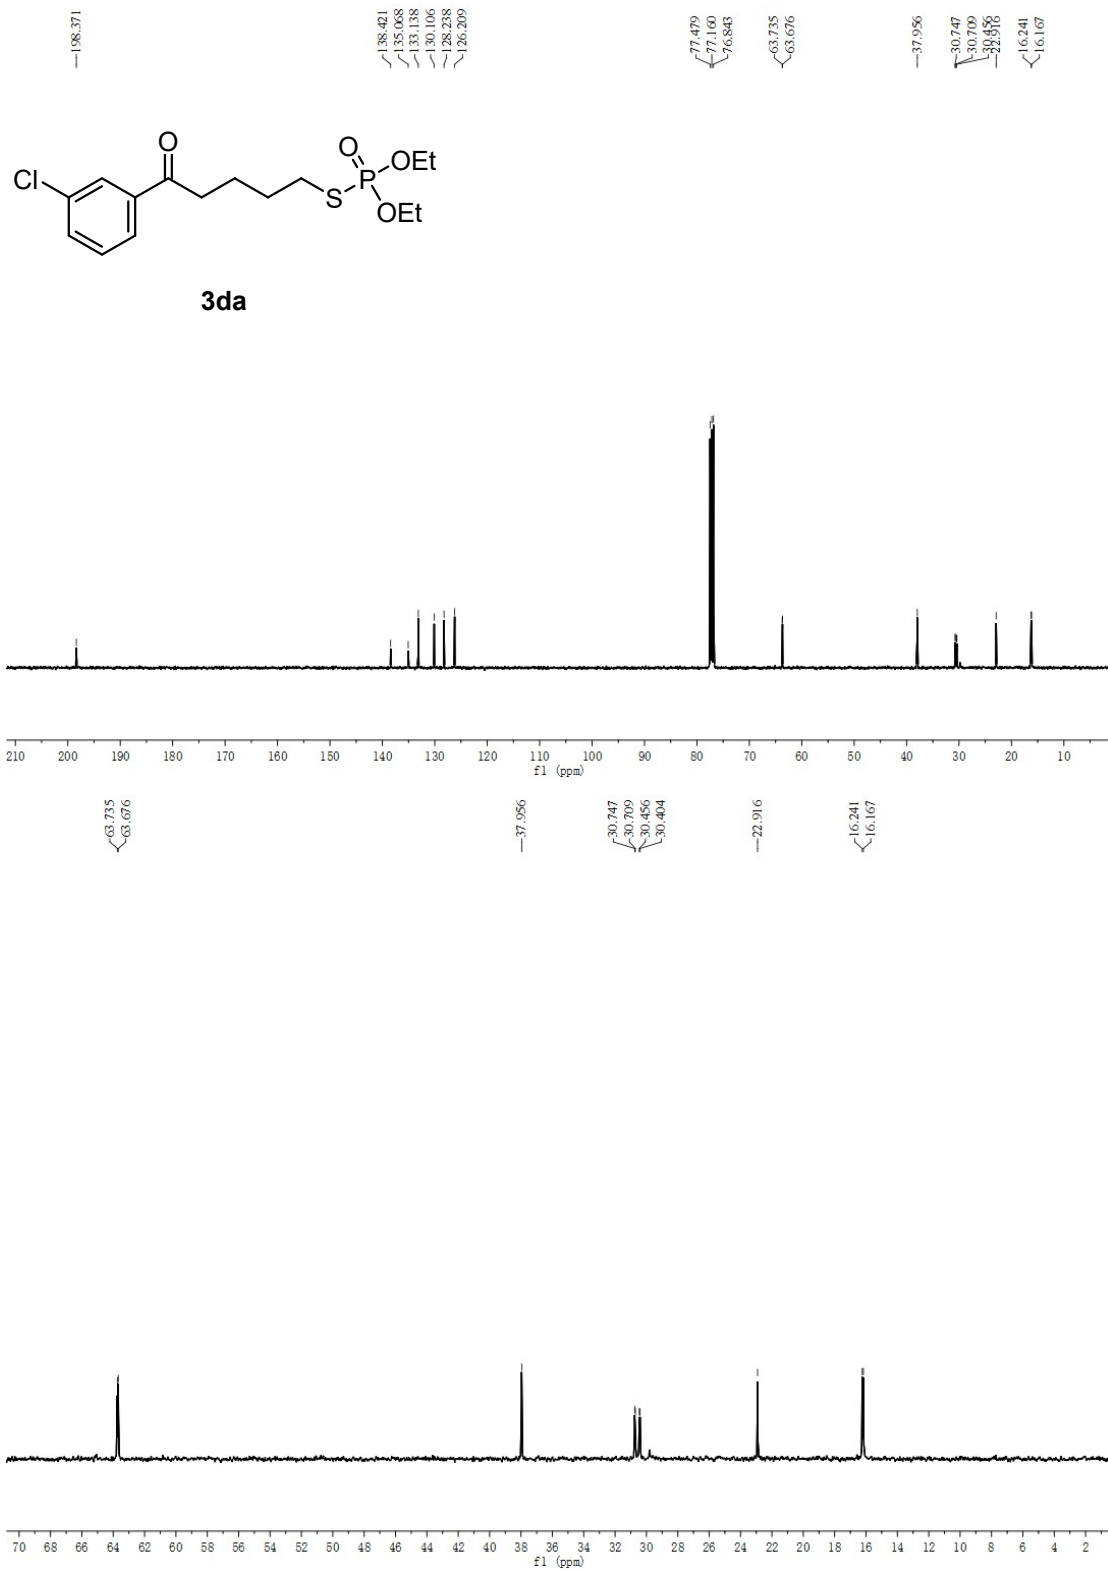

$^{31}\text{P}$  NMR (162 MHz,  $\text{CDCl}_3$ ),  $^1\text{H}$  NMR (400 MHz,  $\text{CDCl}_3$ ) and  $^{13}\text{C}$  NMR (100 MHz,  $\text{CDCl}_3$ ) spectra of product **3ea**

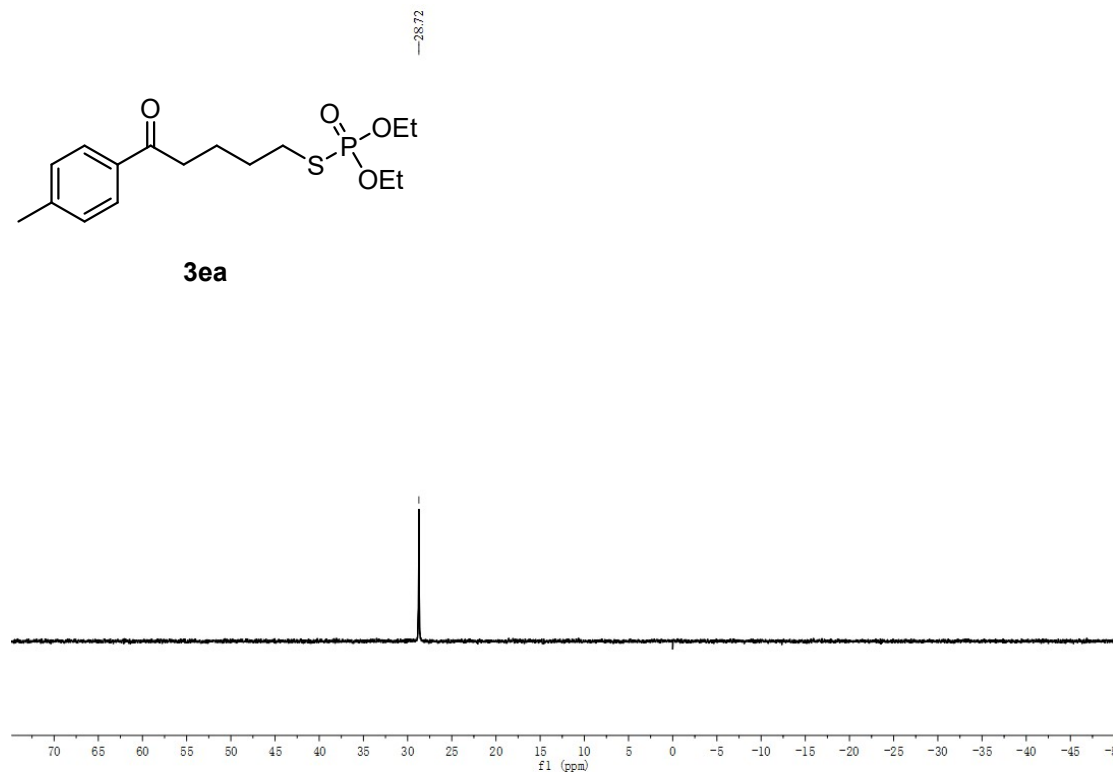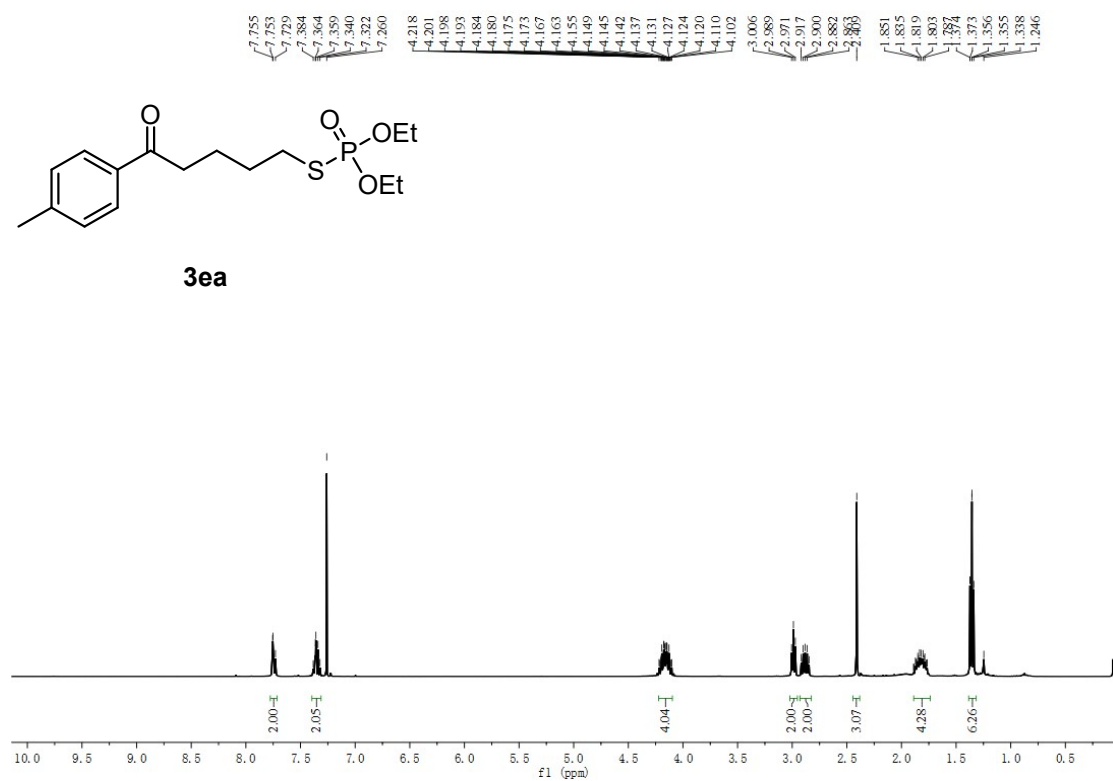

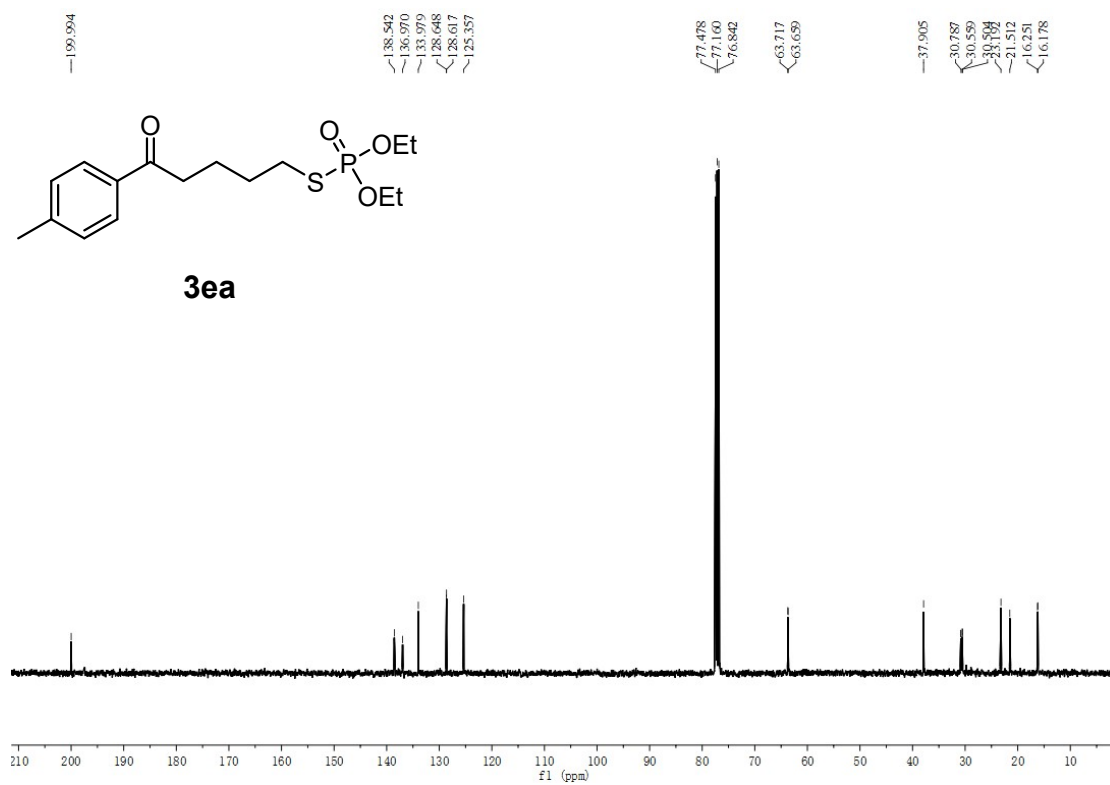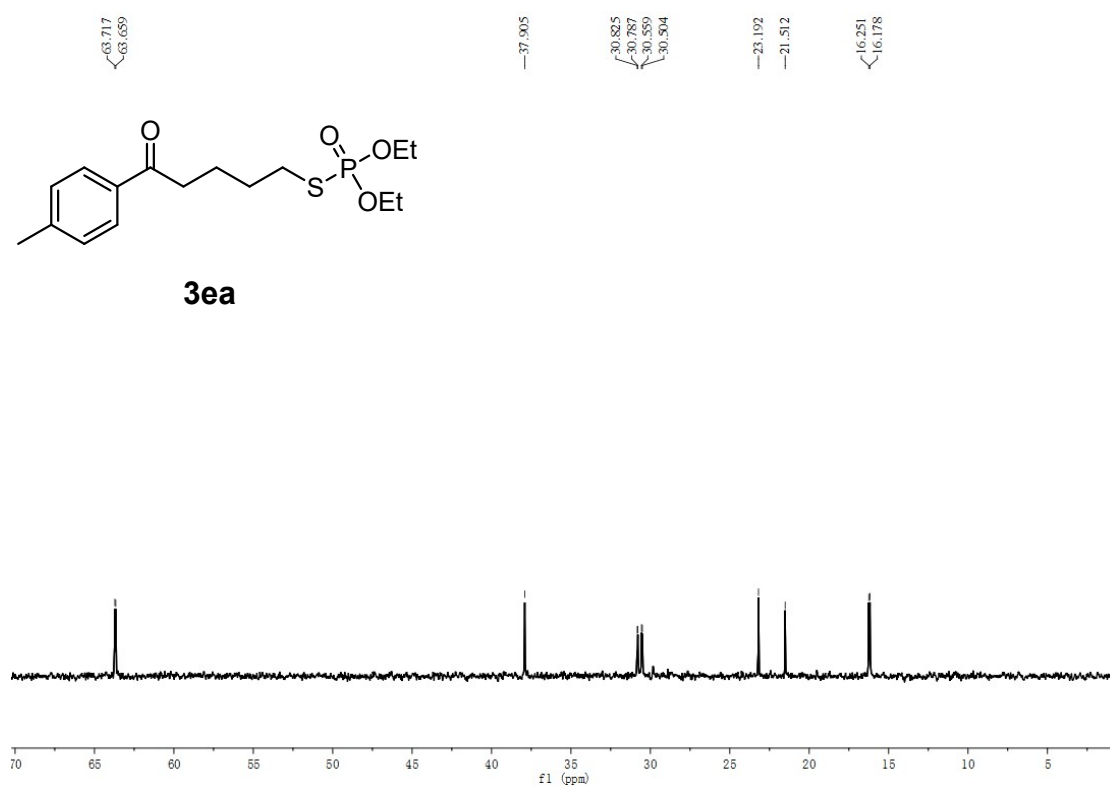

$^{31}\text{P}$  NMR (162 MHz,  $\text{CDCl}_3$ ),  $^1\text{H}$  NMR (400 MHz,  $\text{CDCl}_3$ ) and  $^{13}\text{C}$  NMR (100 MHz,  $\text{CDCl}_3$ ) spectra of product **3fa**

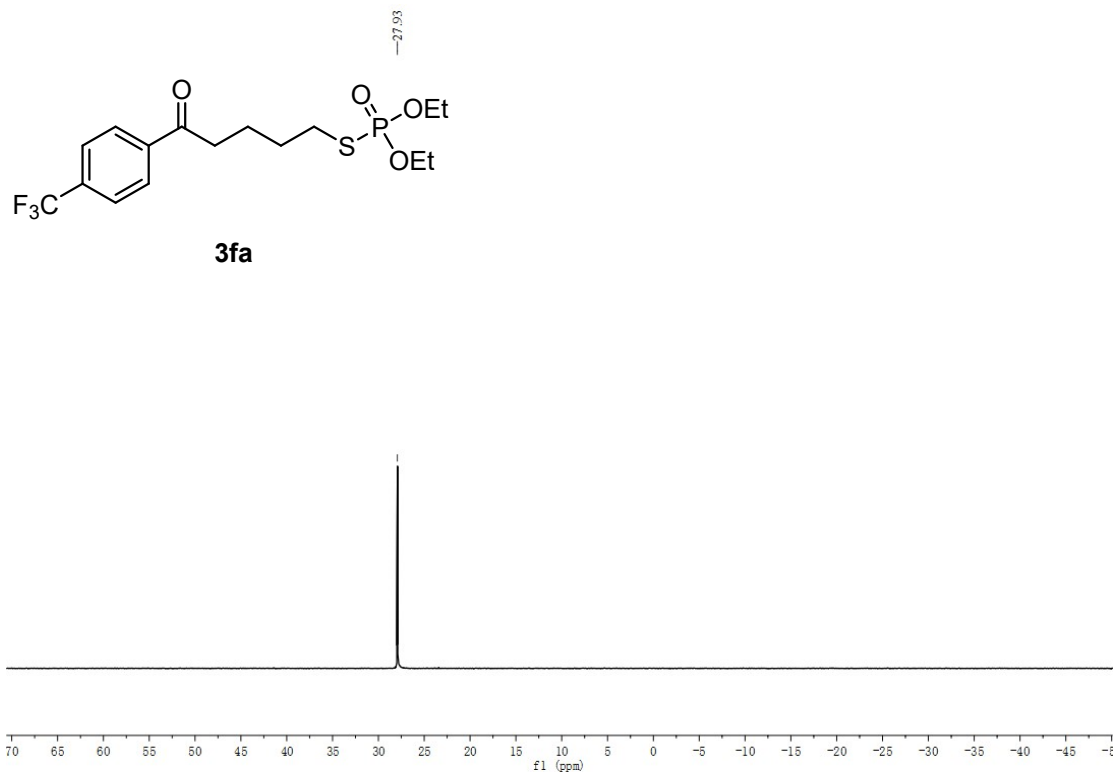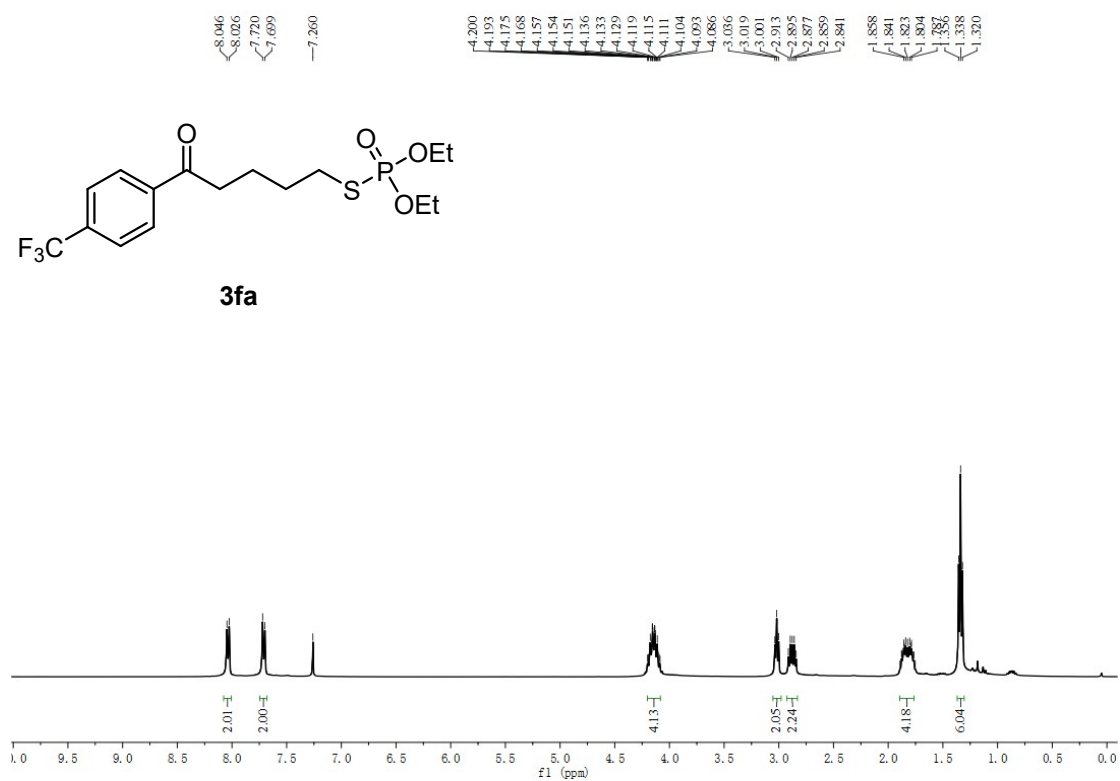

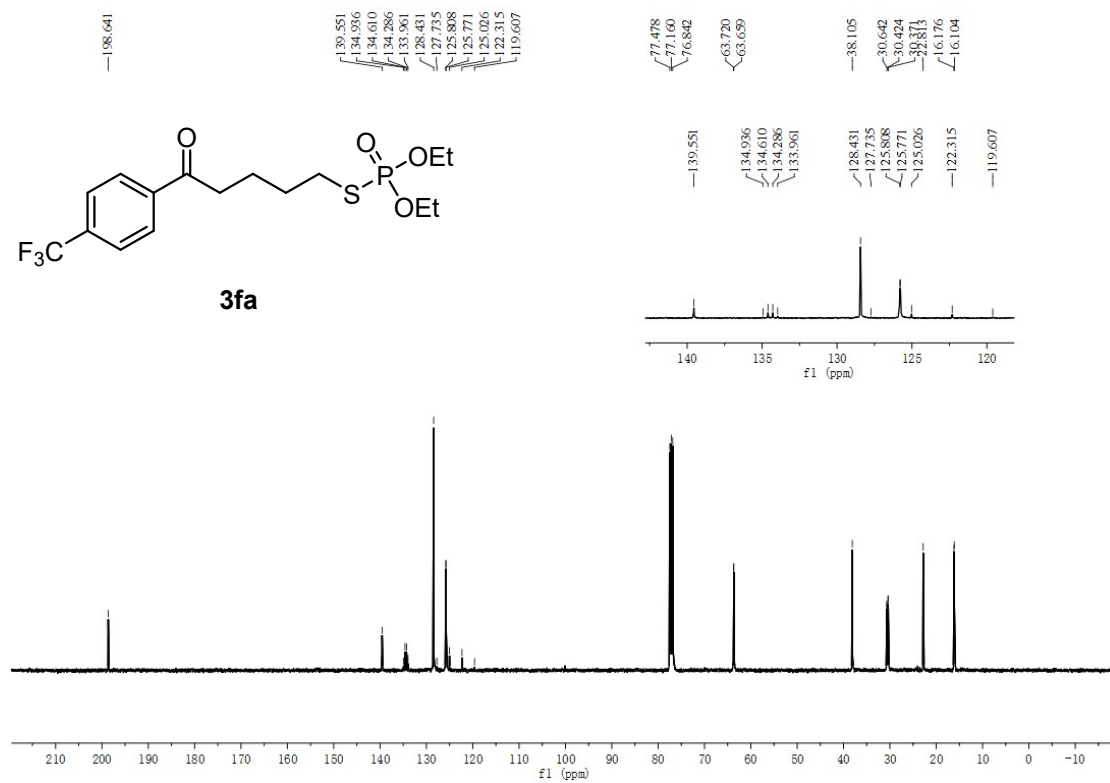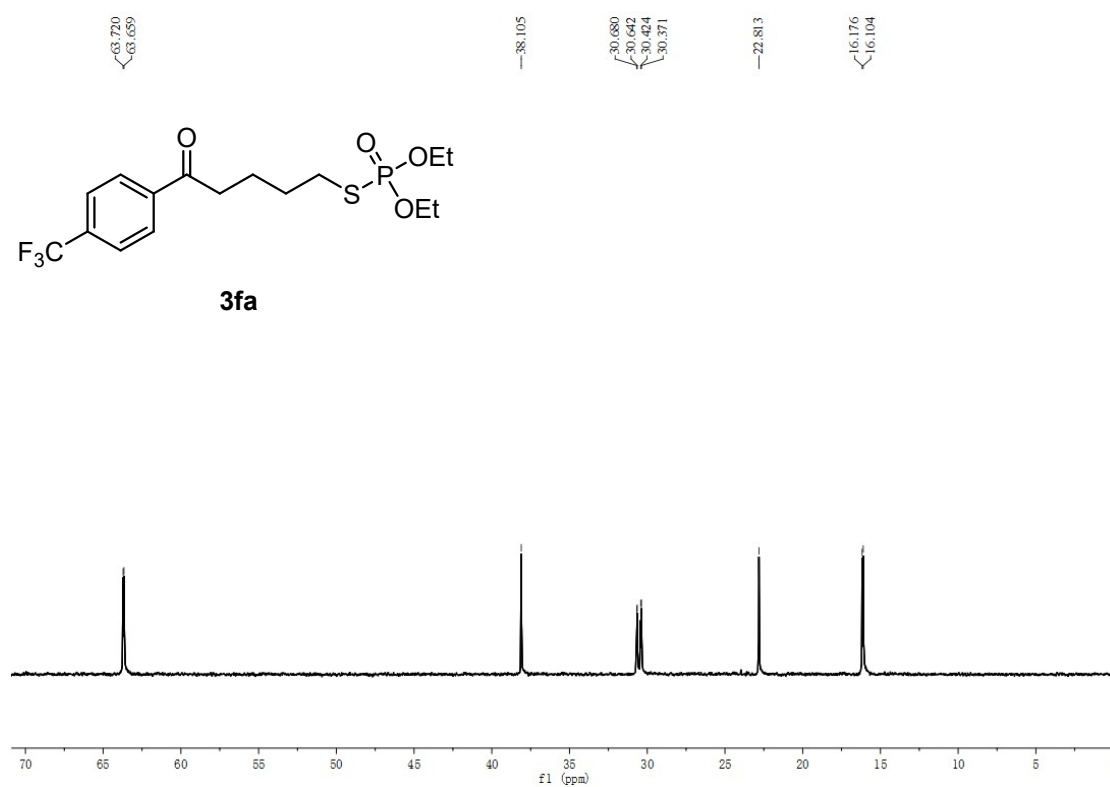

$^{31}\text{P}$  NMR (162 MHz,  $\text{CDCl}_3$ ),  $^1\text{H}$  NMR (400 MHz,  $\text{CDCl}_3$ ) and  $^{13}\text{C}$  NMR (100 MHz,  $\text{CDCl}_3$ ) spectra of product **3ga**

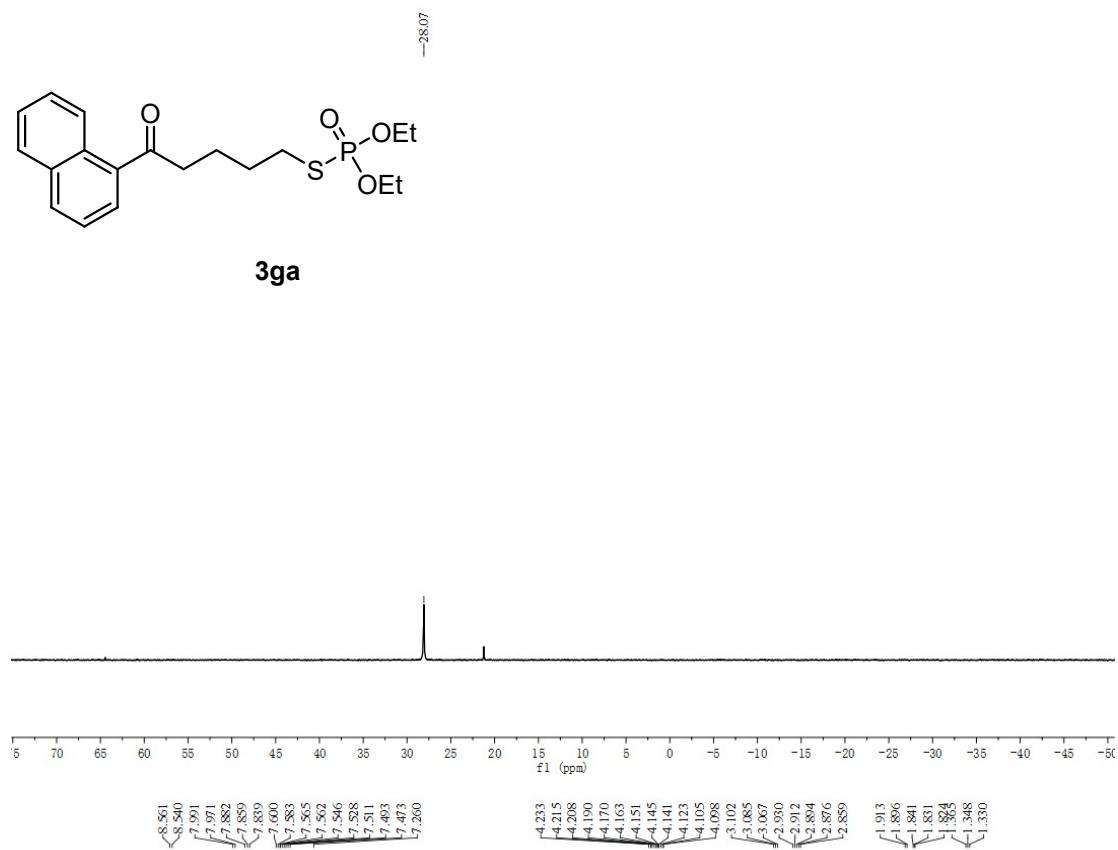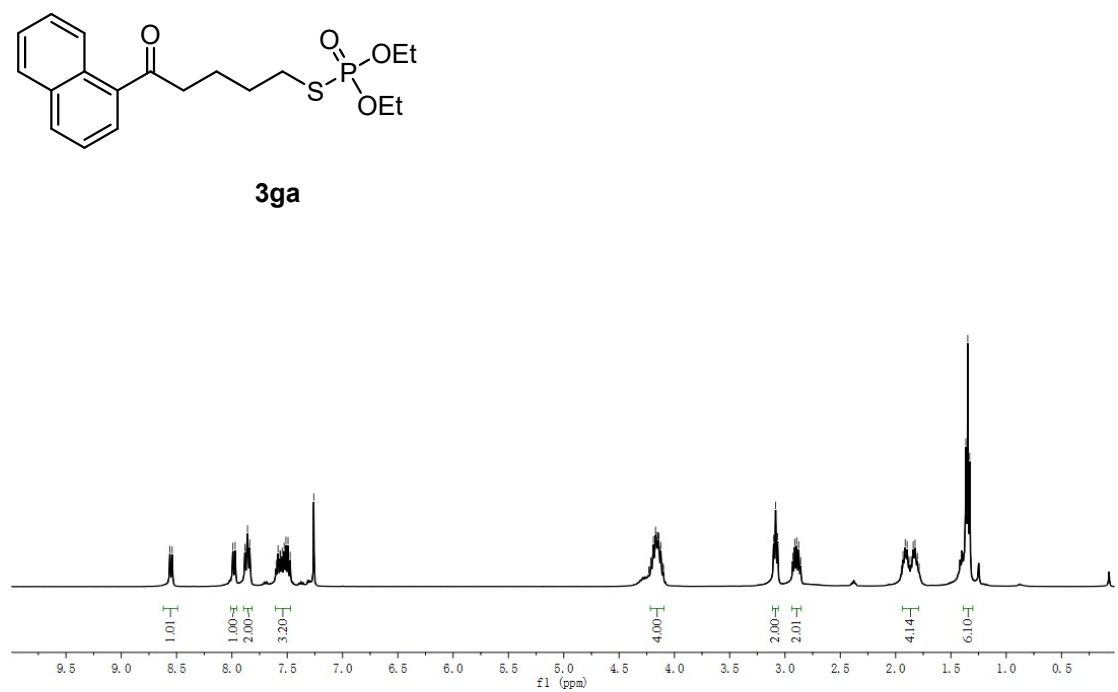

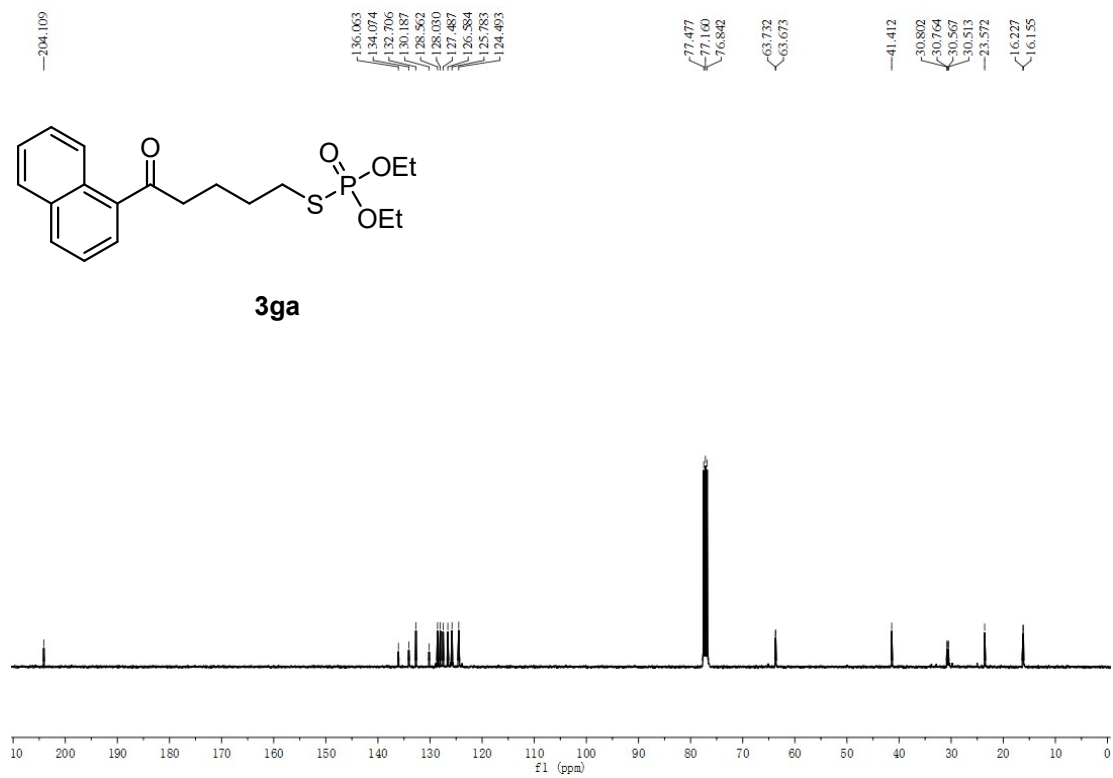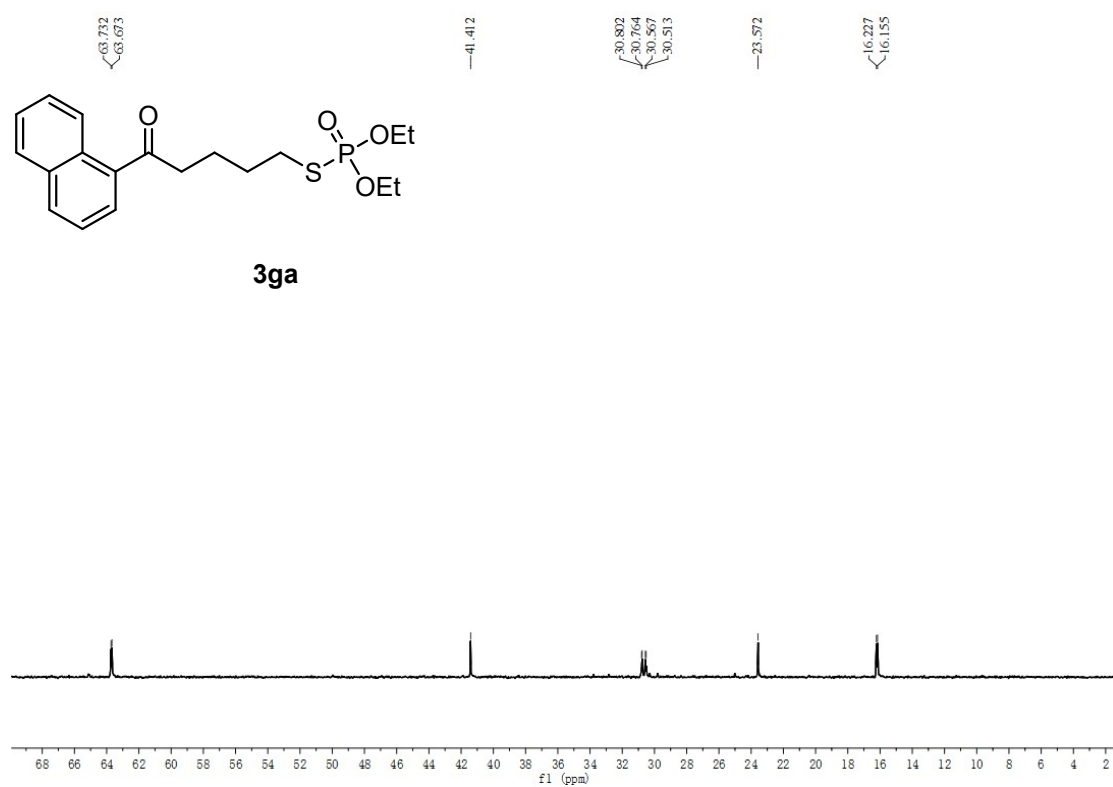



$^{31}\text{P}$  NMR (162 MHz,  $\text{CDCl}_3$ ),  $^1\text{H}$  NMR (400 MHz,  $\text{CDCl}_3$ ) and  $^{13}\text{C}$  NMR (100 MHz,  $\text{CDCl}_3$ ) spectra of product **3ha**

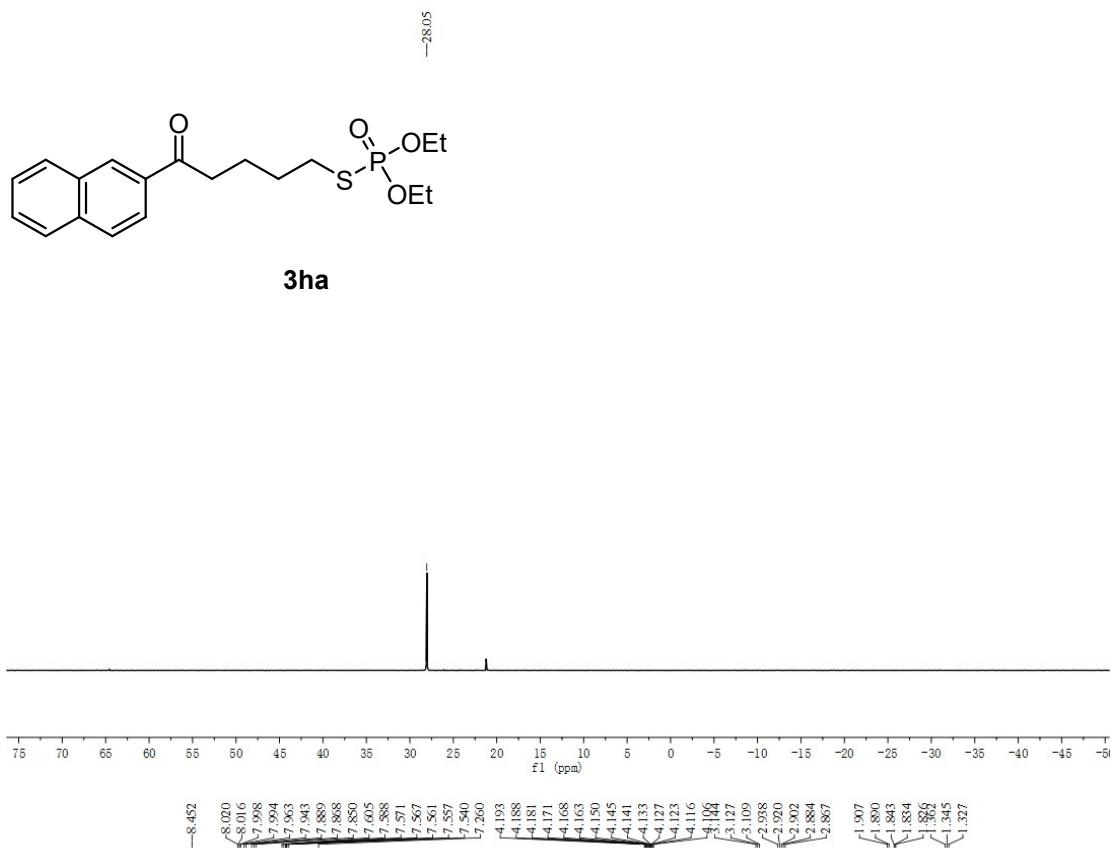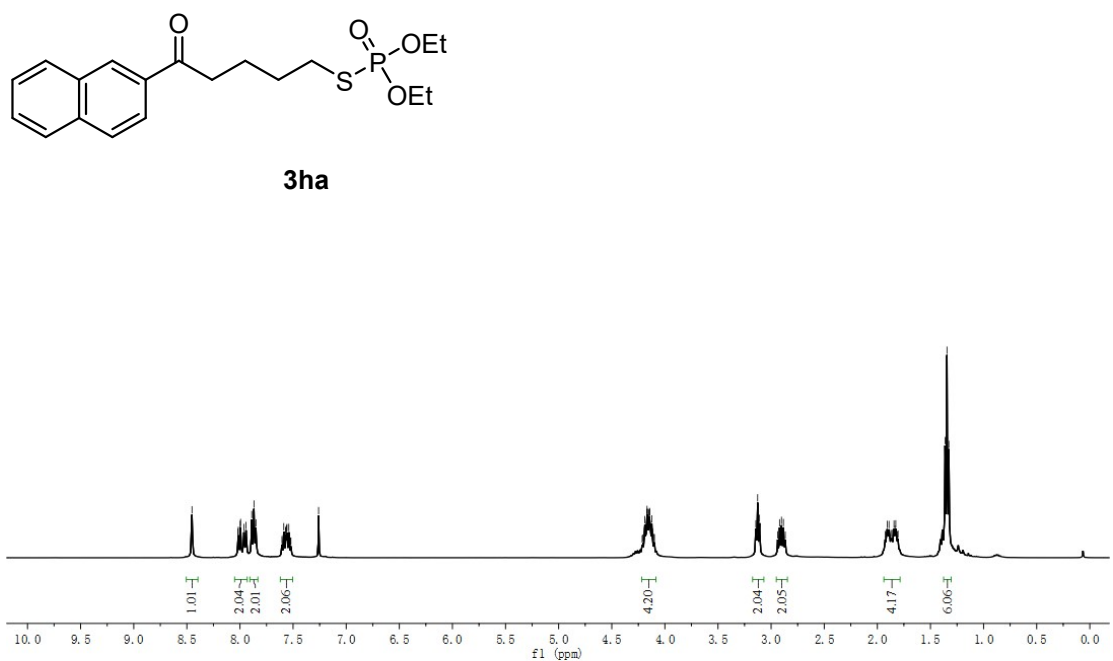

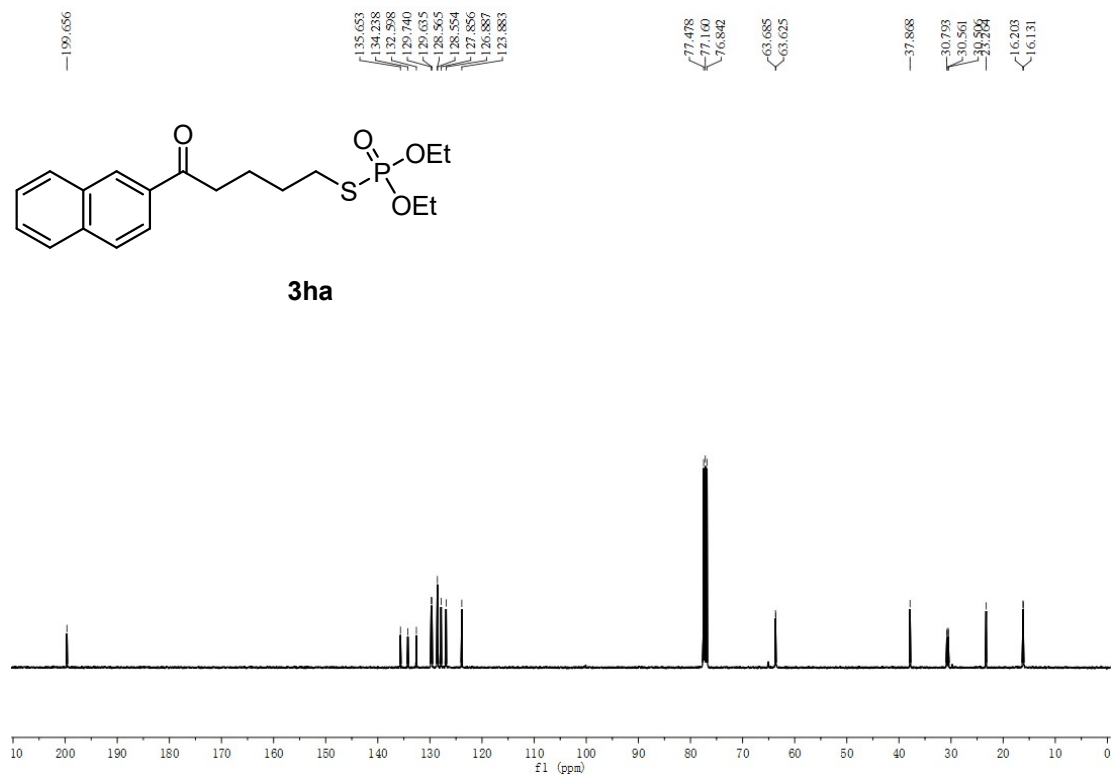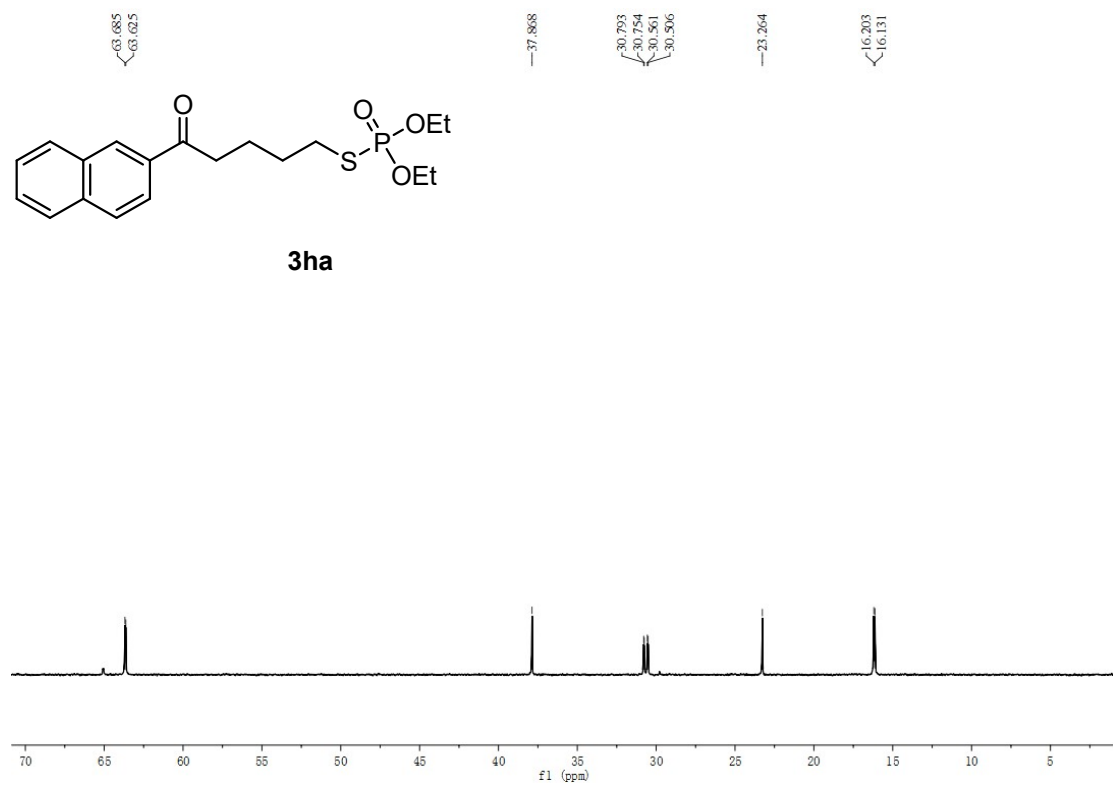

$^{31}\text{P}$  NMR (162 MHz,  $\text{CDCl}_3$ ),  $^1\text{H}$  NMR (400 MHz,  $\text{CDCl}_3$ ) and  $^{13}\text{C}$  NMR (100 MHz,  $\text{CDCl}_3$ ) spectra of product **3ia**

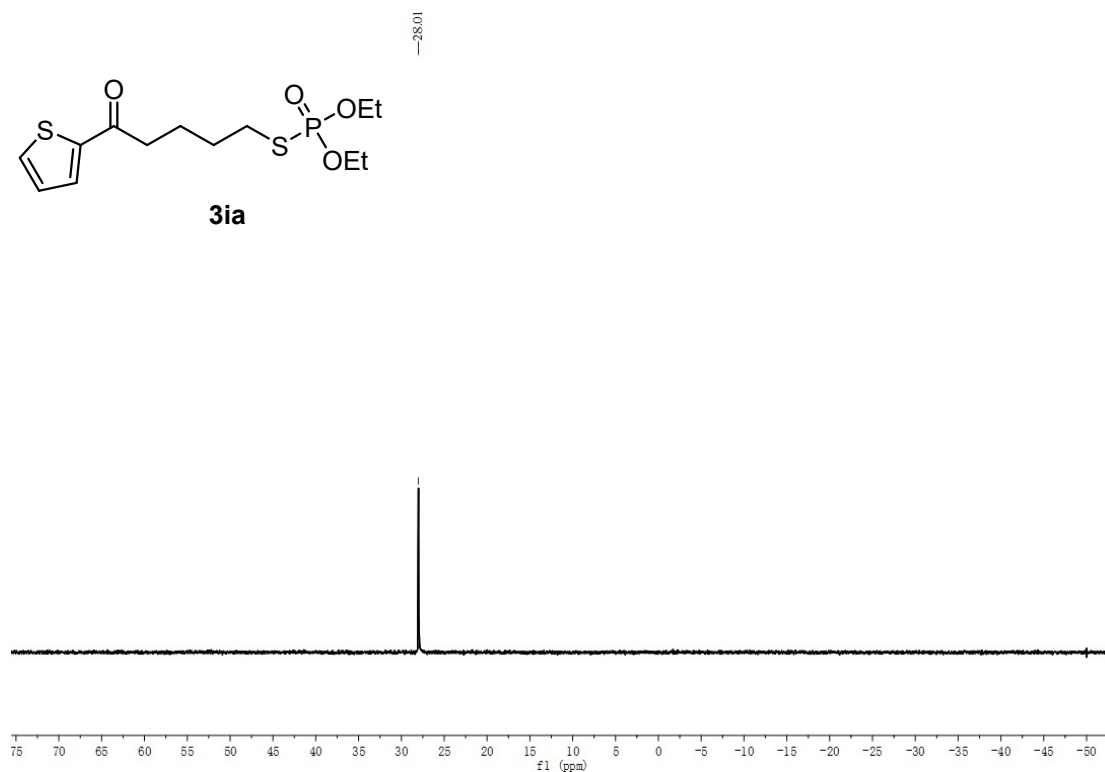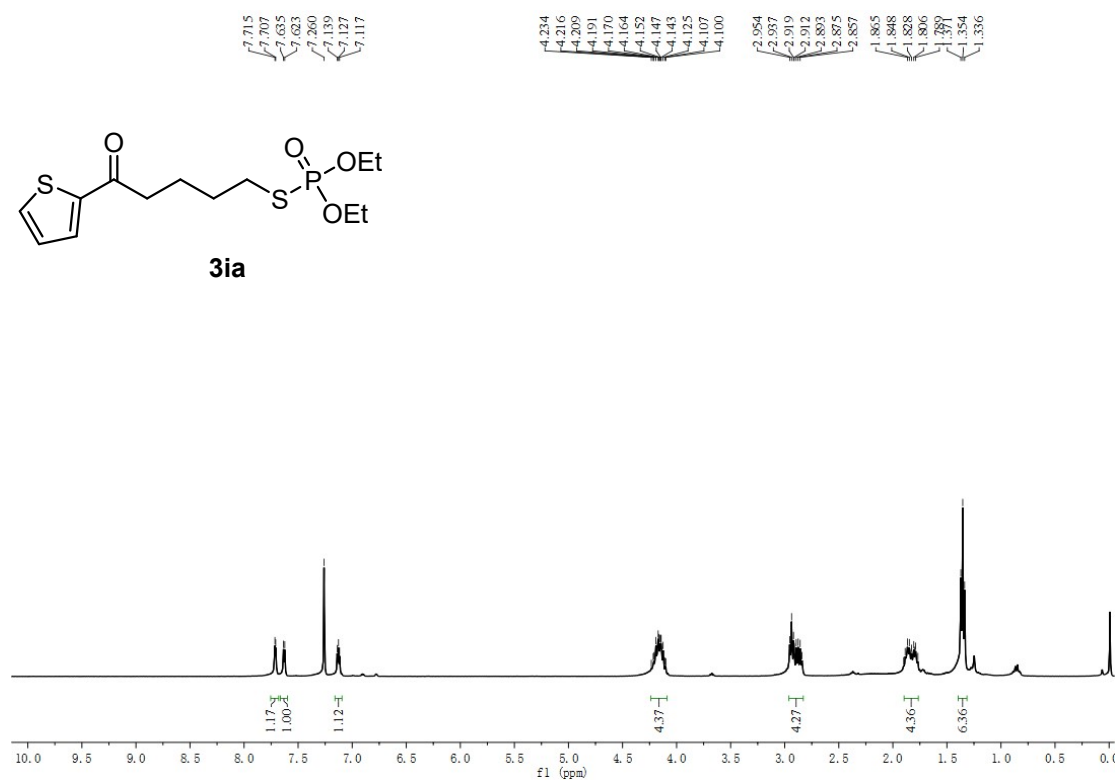

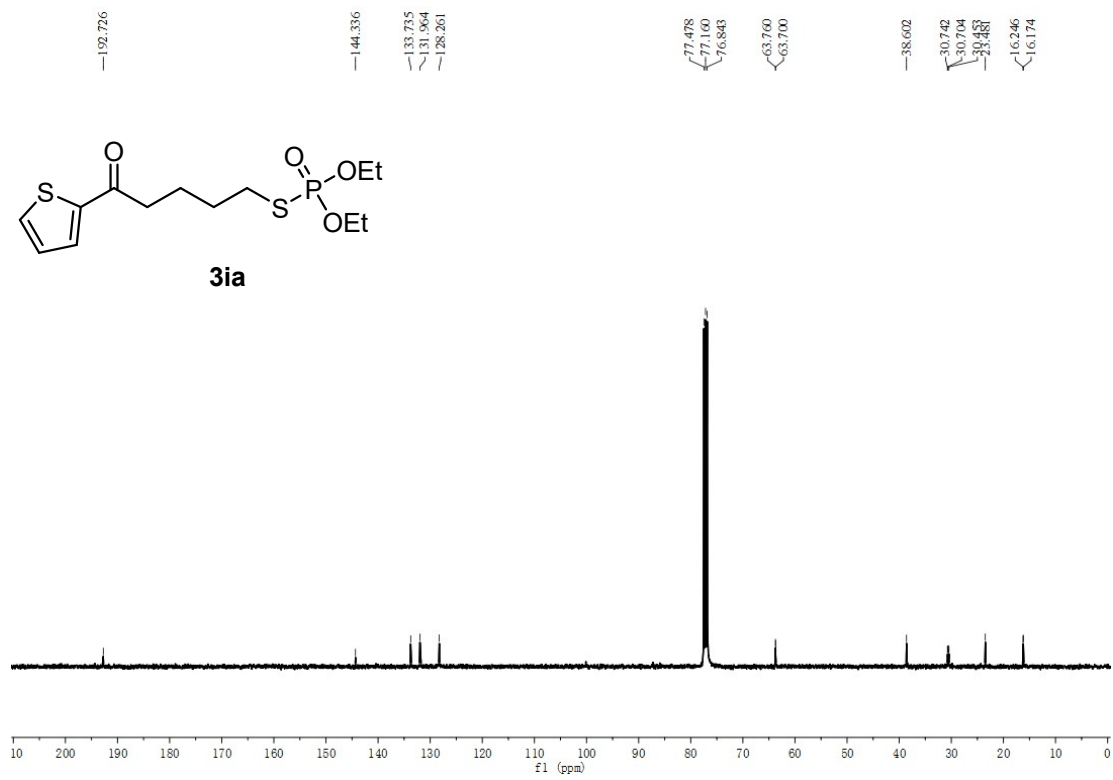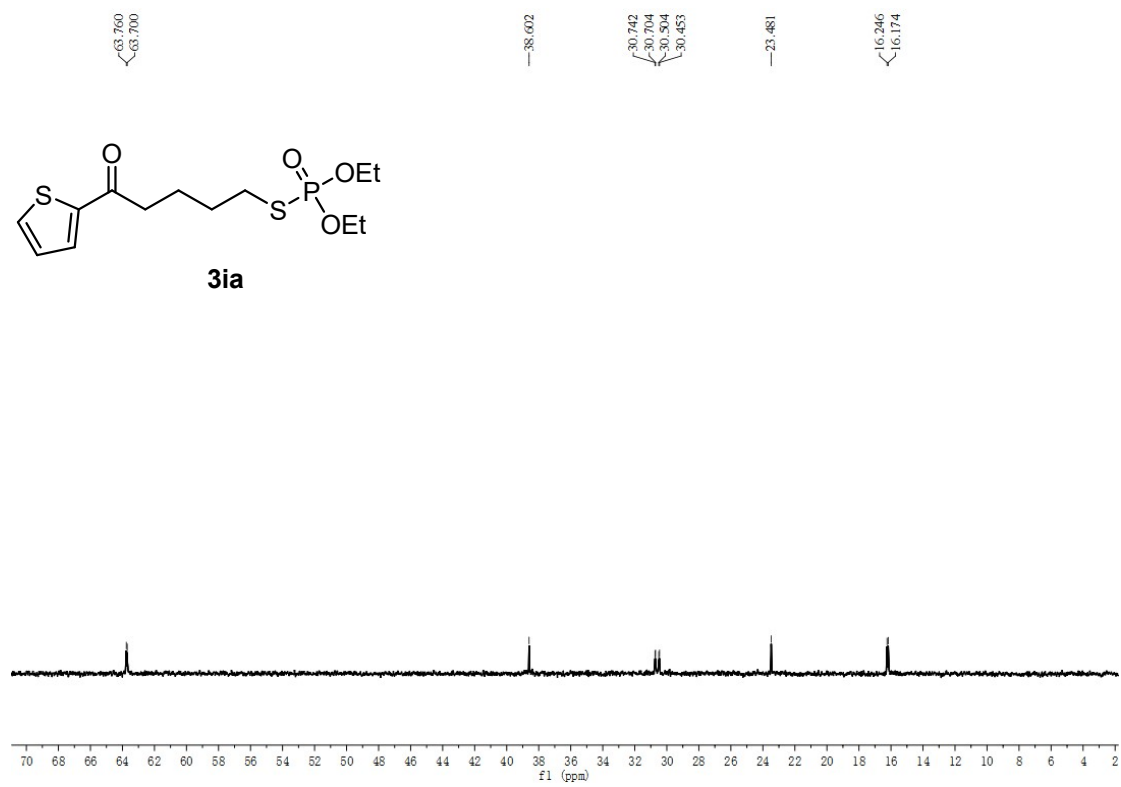

$^{31}\text{P}$  NMR (162 MHz,  $\text{CDCl}_3$ ),  $^1\text{H}$  NMR (400 MHz,  $\text{CDCl}_3$ ) and  $^{13}\text{C}$  NMR (100 MHz,  $\text{CDCl}_3$ ) spectra of product **3ja**

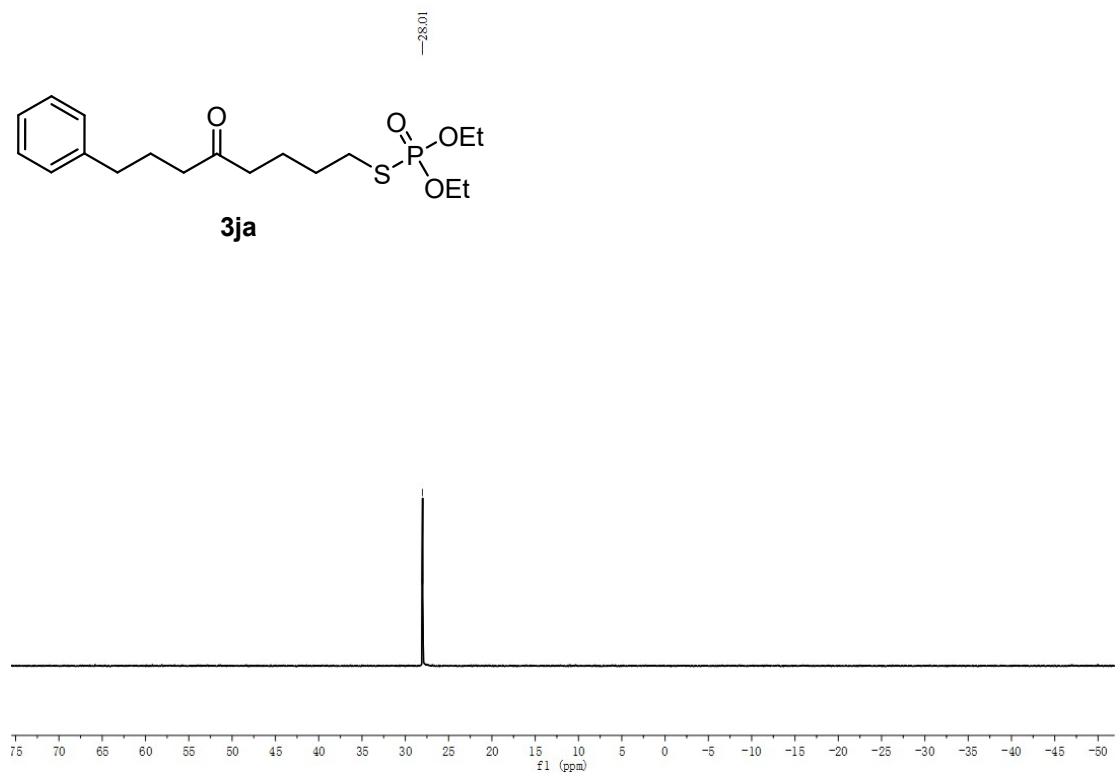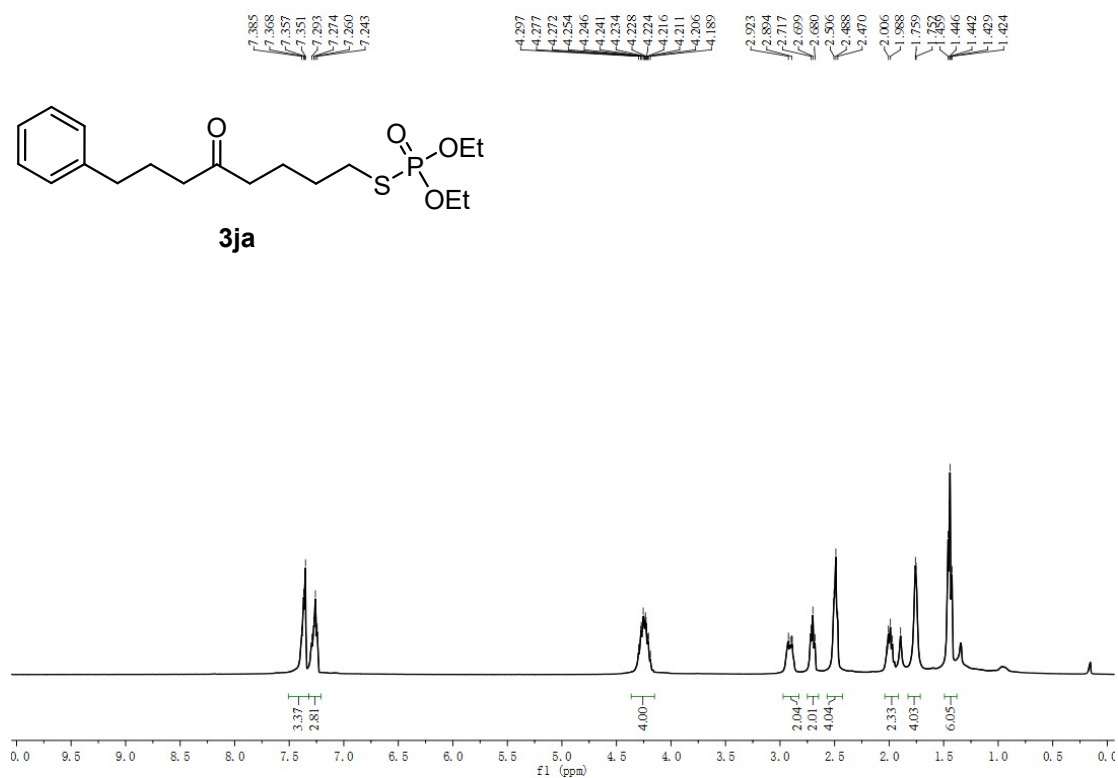

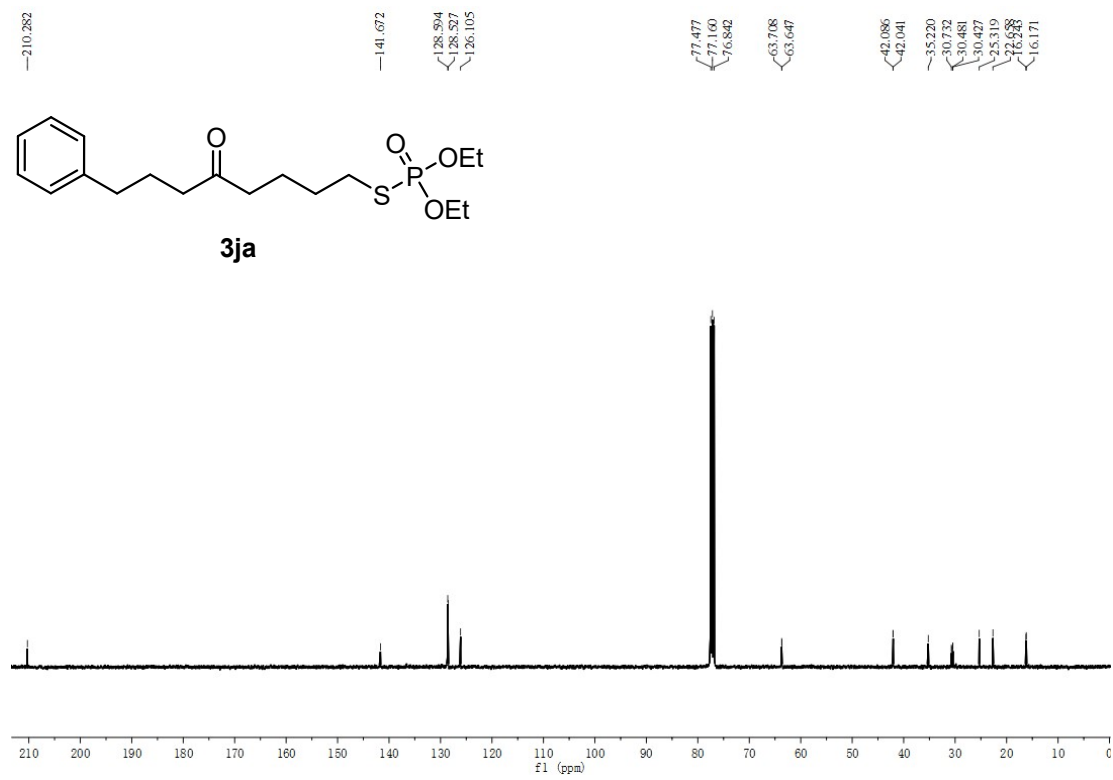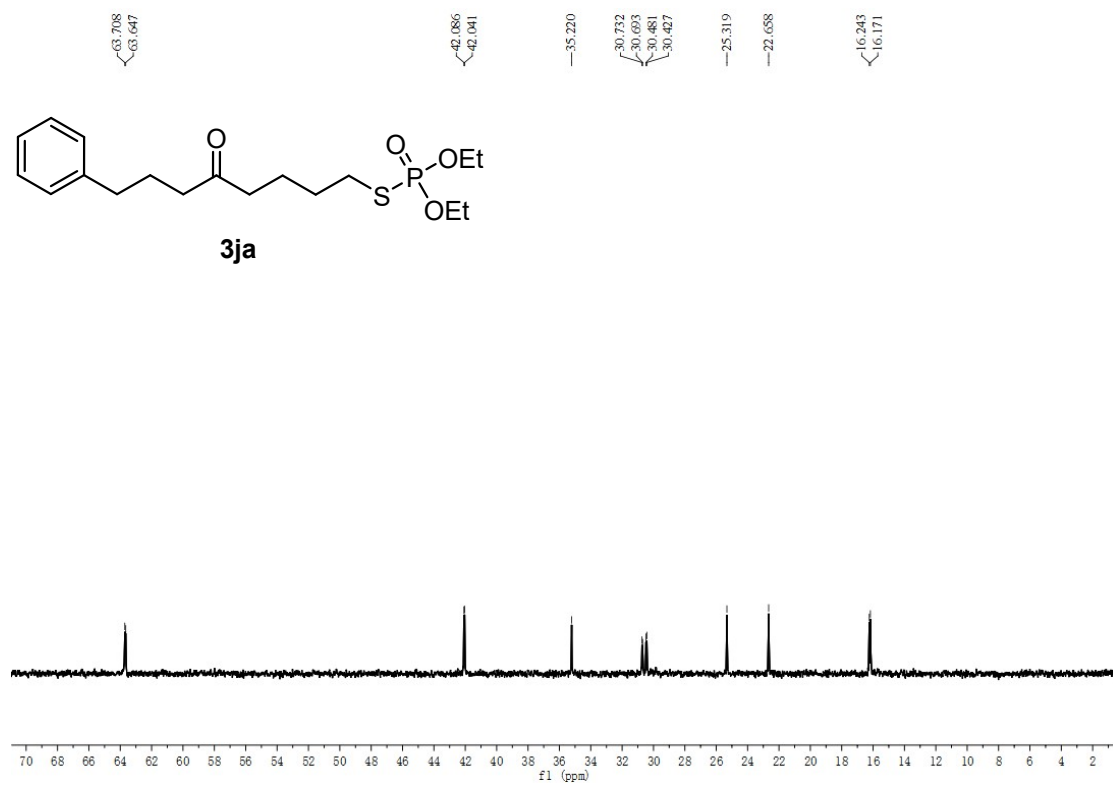

$^{31}\text{P}$  NMR (162 MHz,  $\text{CDCl}_3$ ),  $^1\text{H}$  NMR (400 MHz,  $\text{CDCl}_3$ ) and  $^{13}\text{C}$  NMR (100 MHz,  $\text{CDCl}_3$ ) spectra of product **3ka**

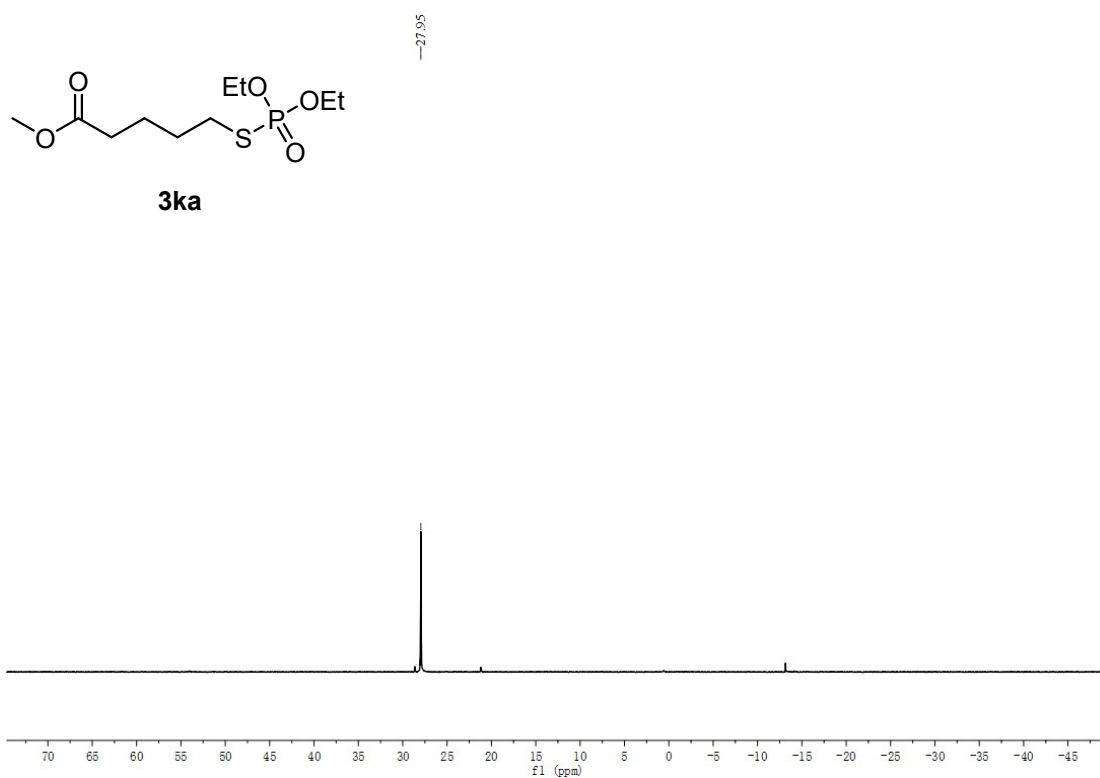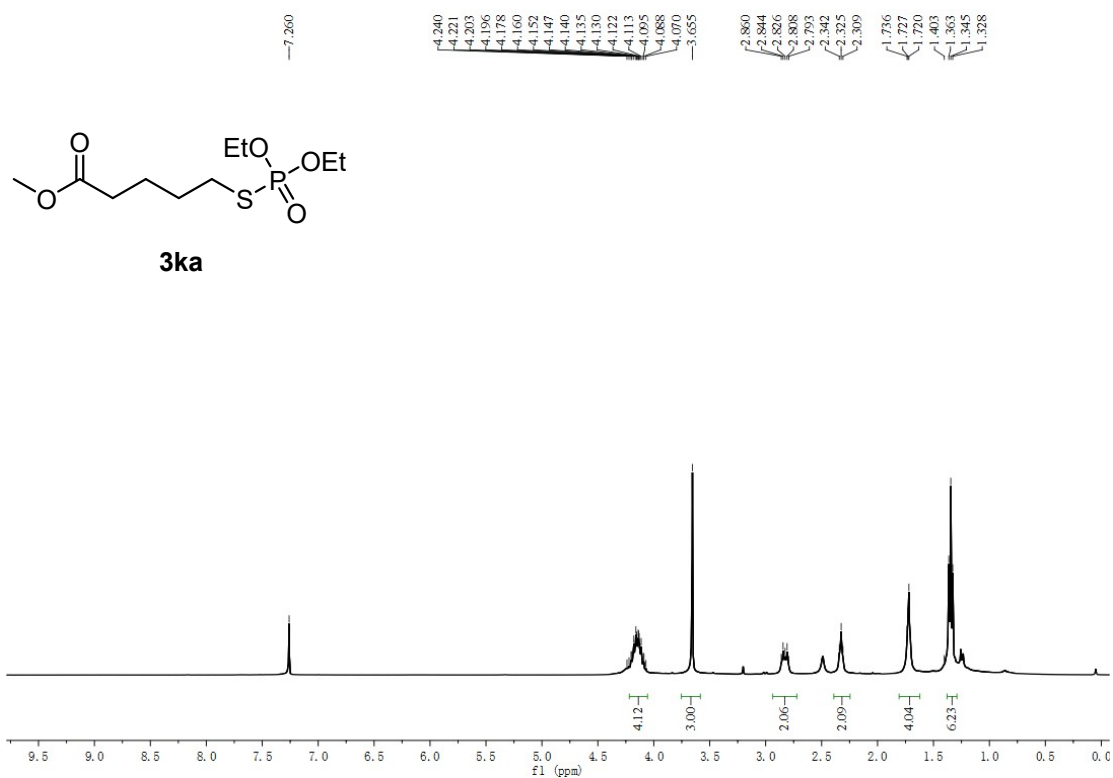

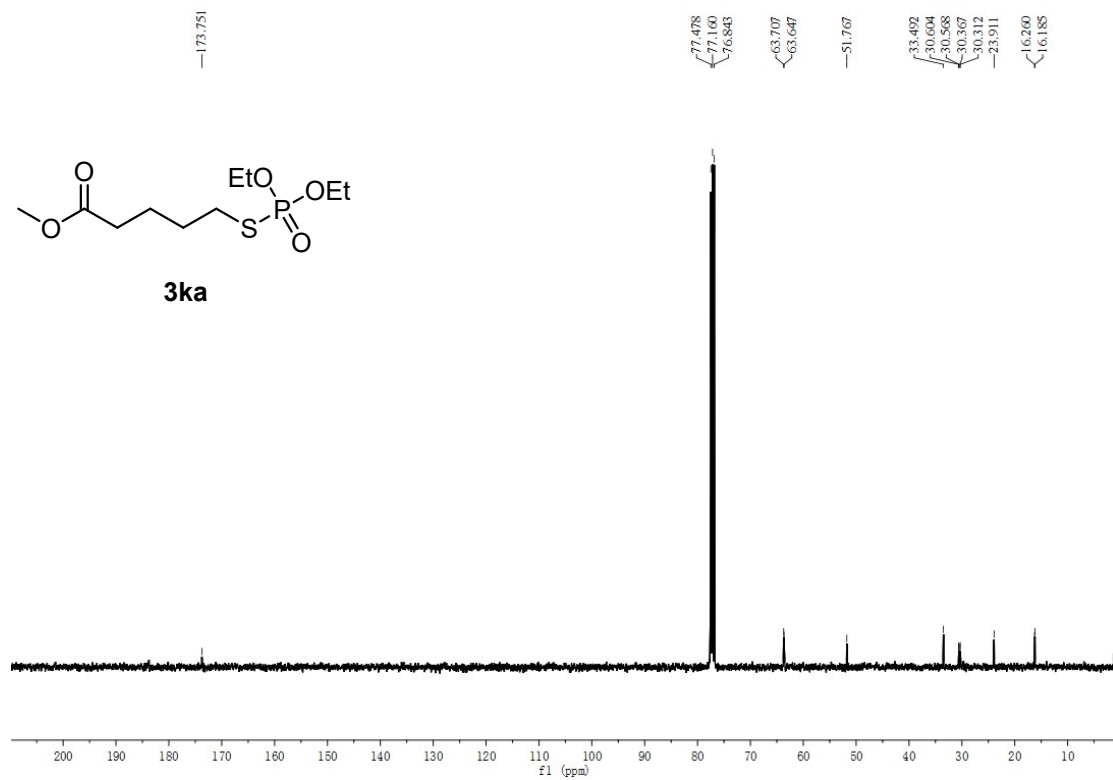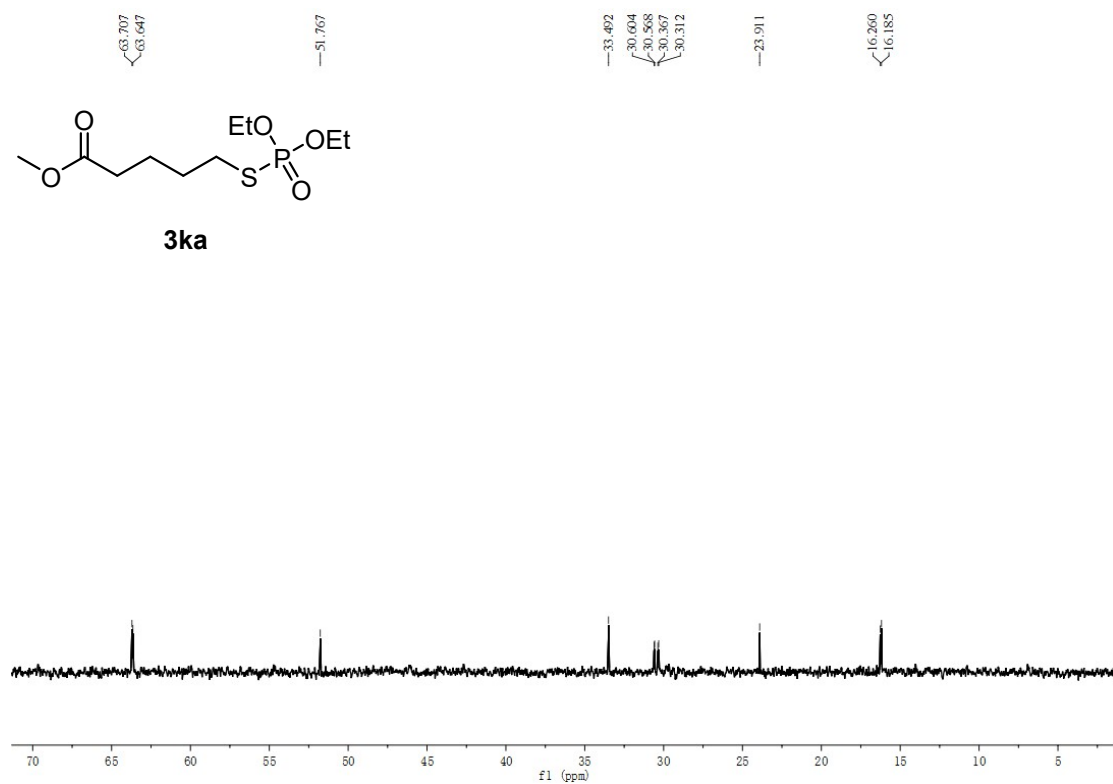



$^{31}\text{P}$  NMR (162 MHz,  $\text{CDCl}_3$ ),  $^1\text{H}$  NMR (400 MHz,  $\text{CDCl}_3$ ) and  $^{13}\text{C}$  NMR (100 MHz,  $\text{CDCl}_3$ ) spectra of product **3la**

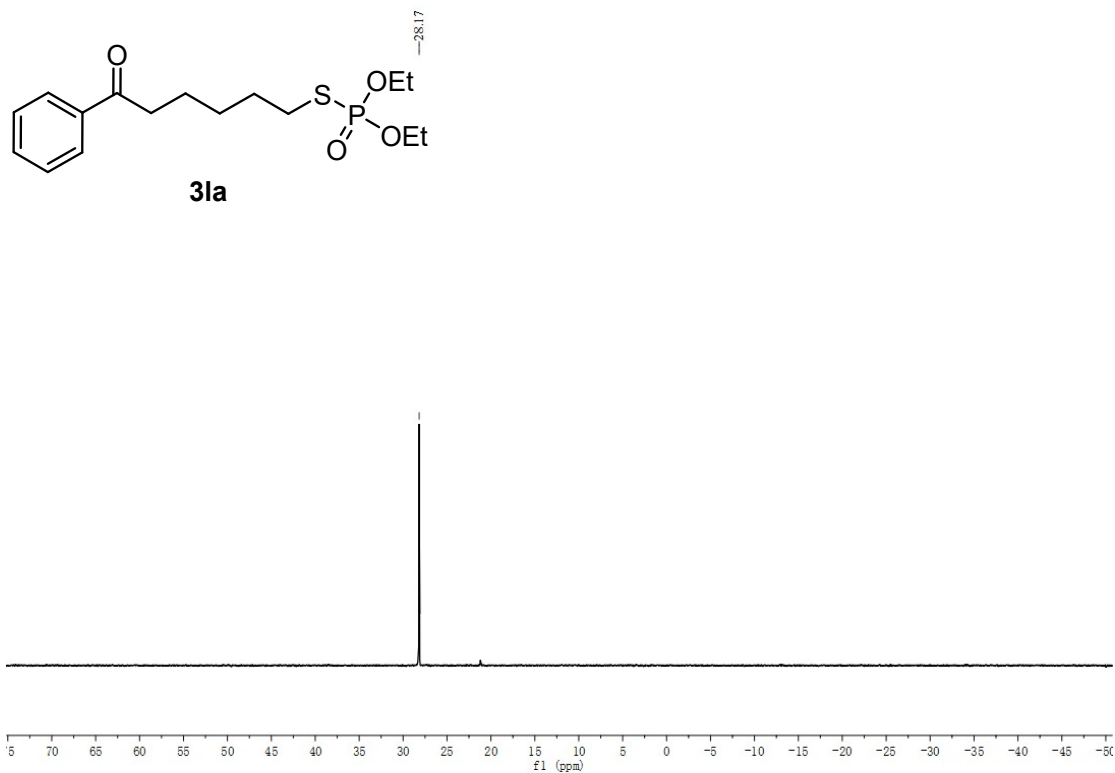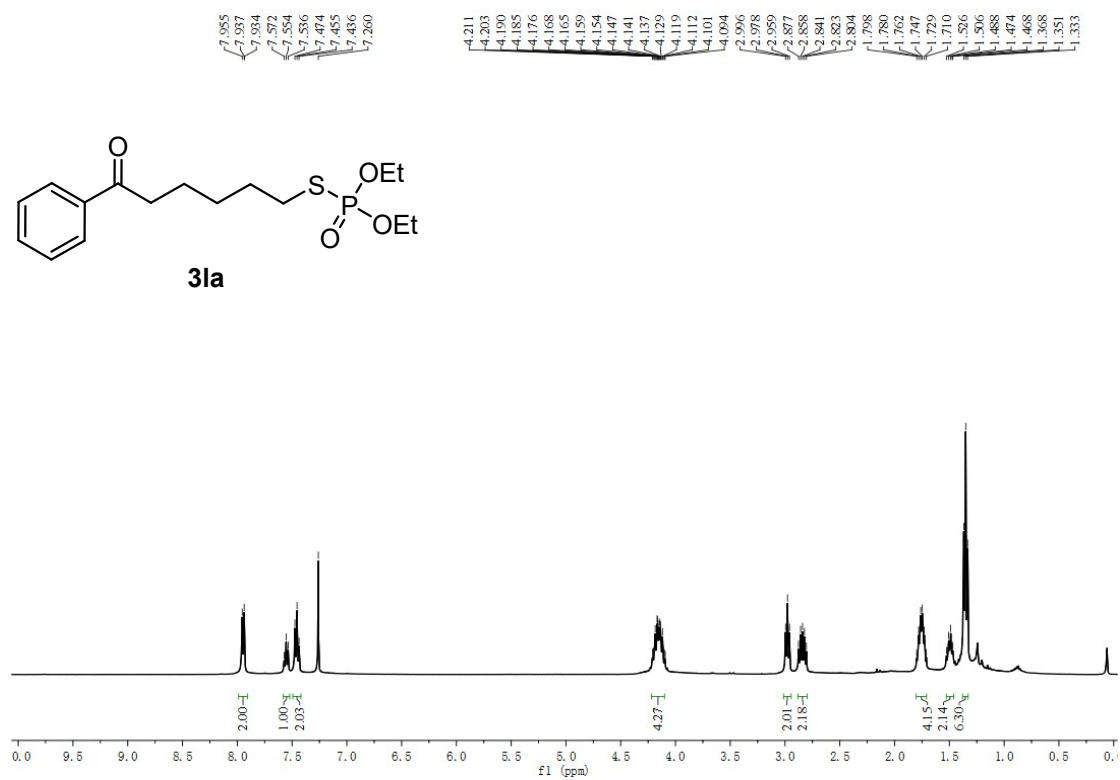

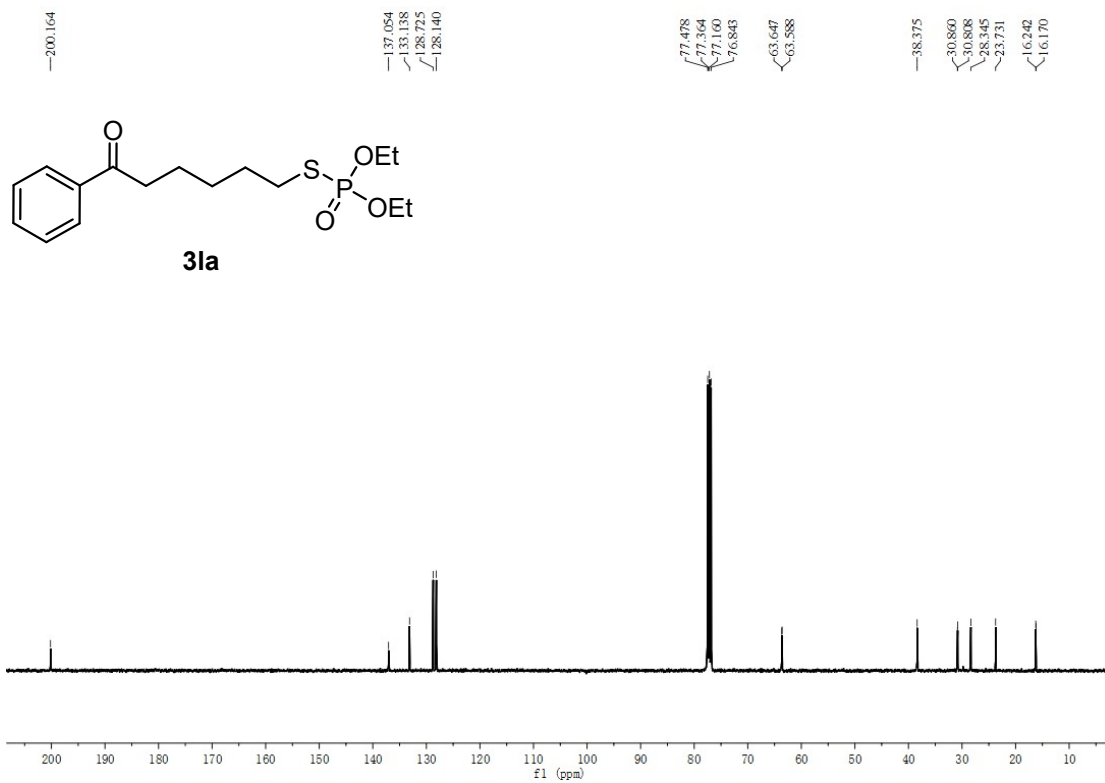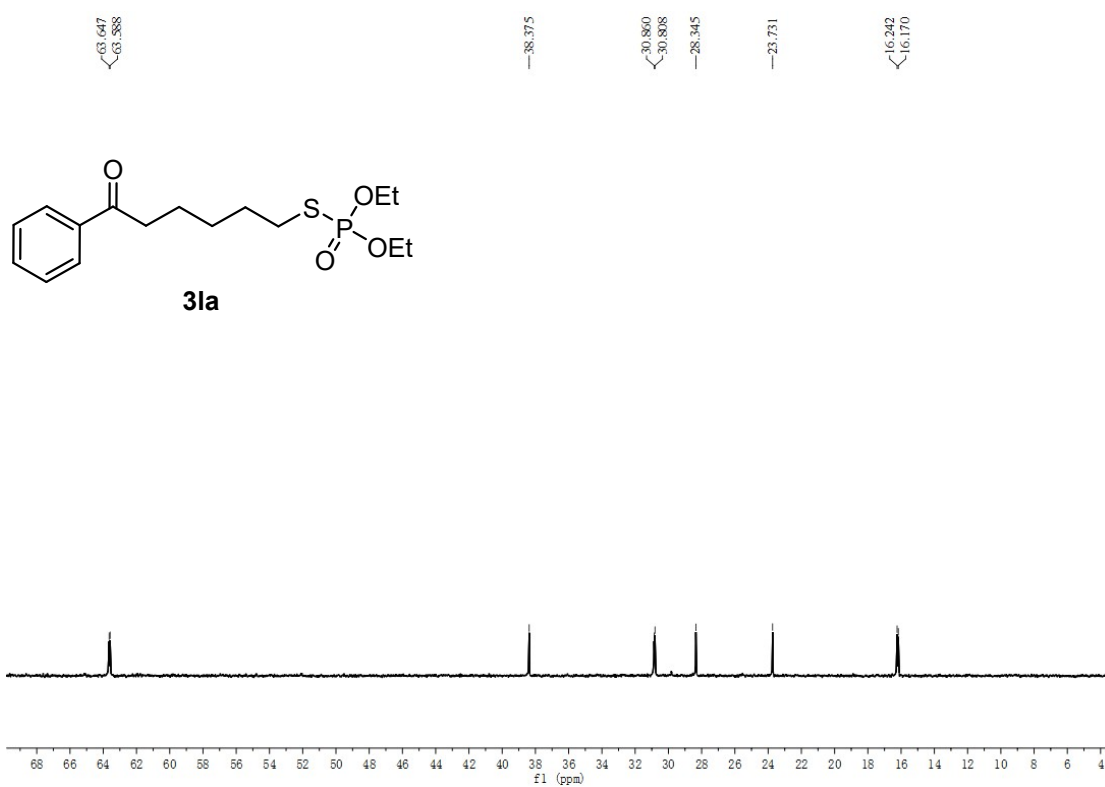

$^{31}\text{P}$  NMR (162 MHz,  $\text{CDCl}_3$ ),  $^1\text{H}$  NMR (400 MHz,  $\text{CDCl}_3$ ) and  $^{13}\text{C}$  NMR (100 MHz,  $\text{CDCl}_3$ ) spectra of product **3ma**

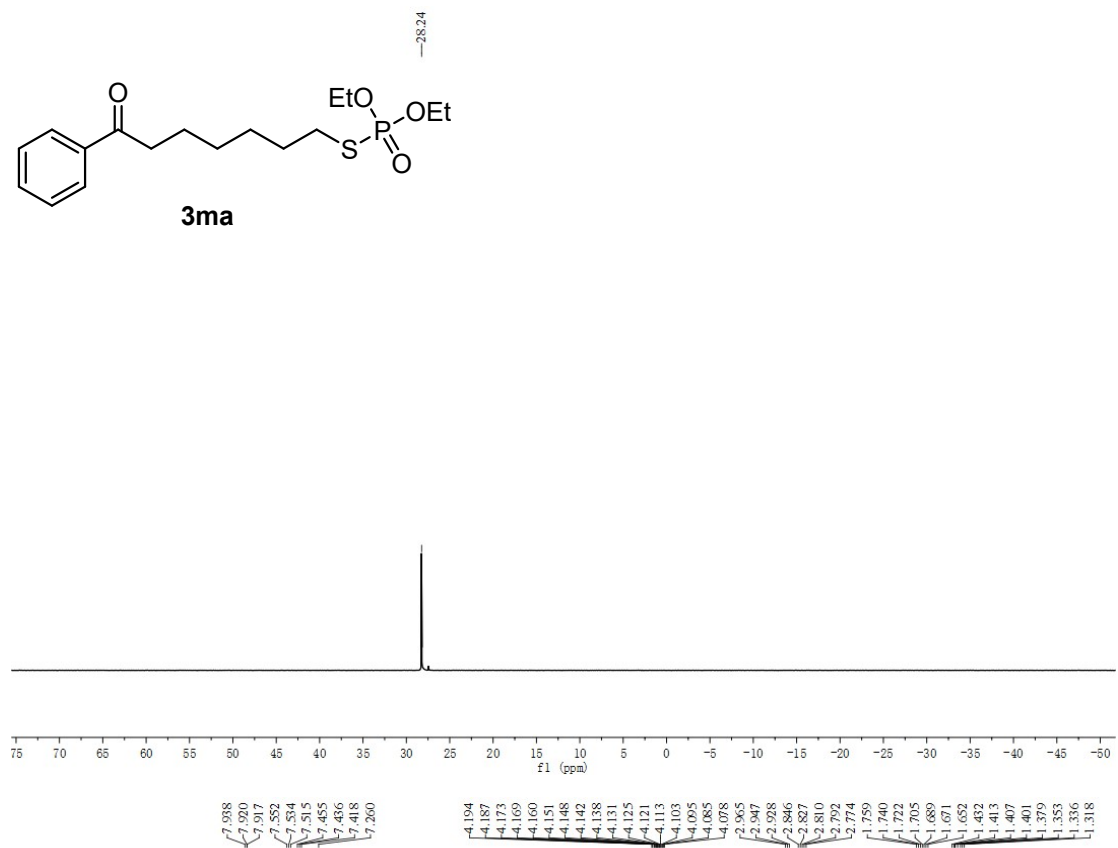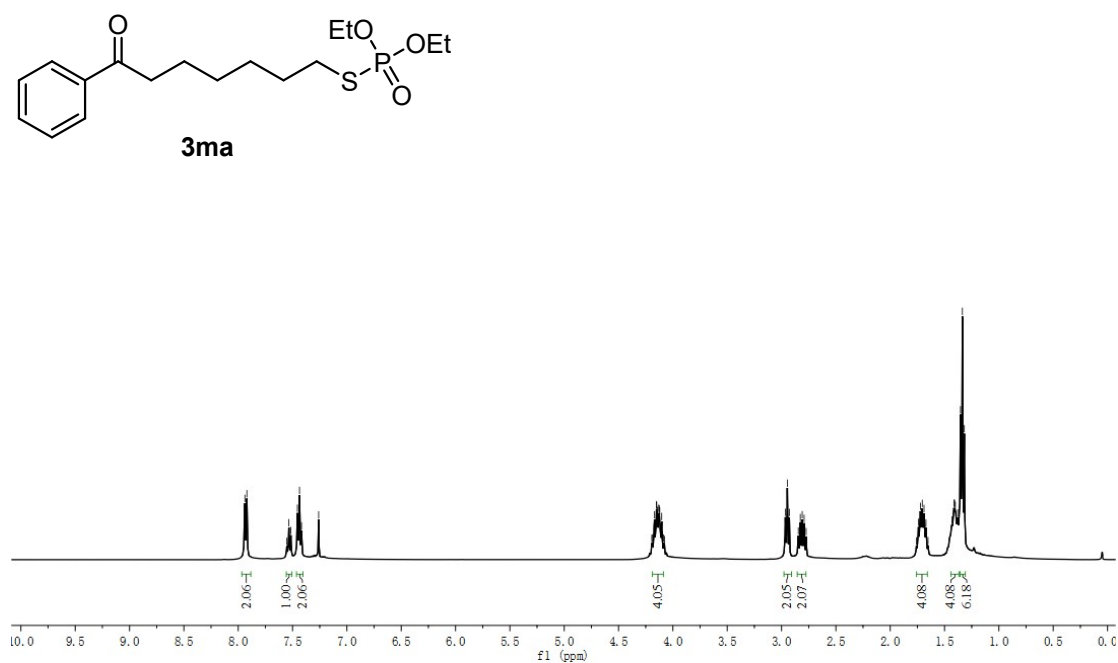

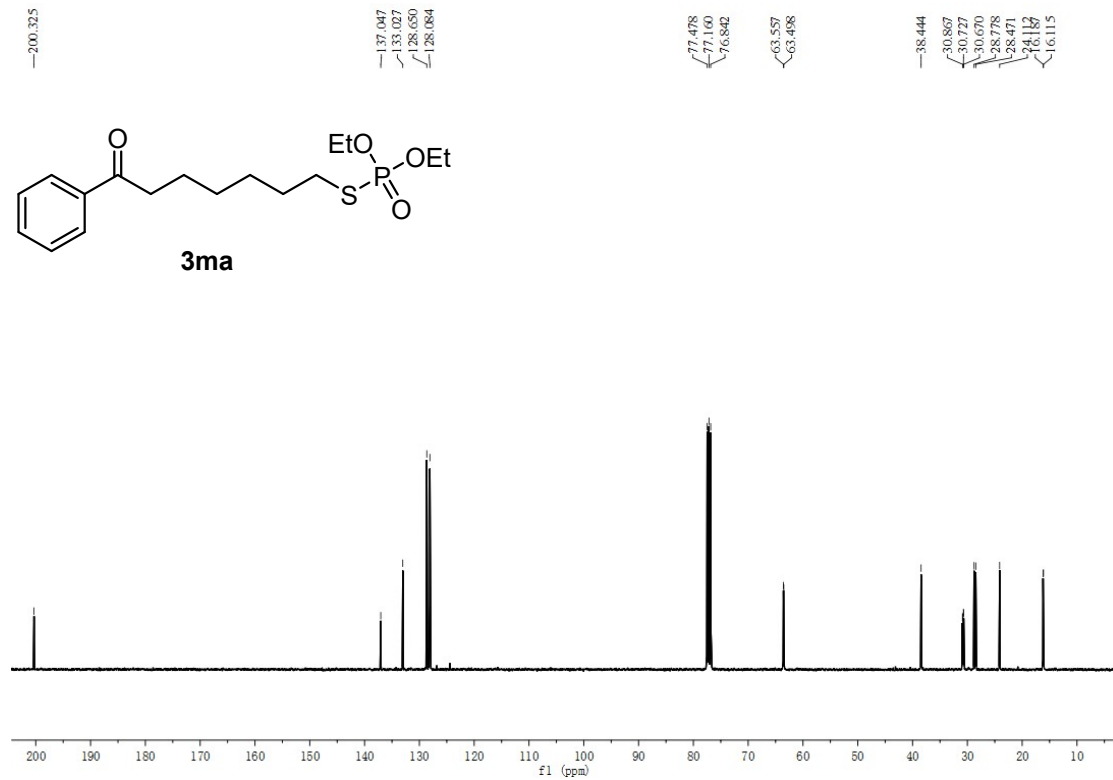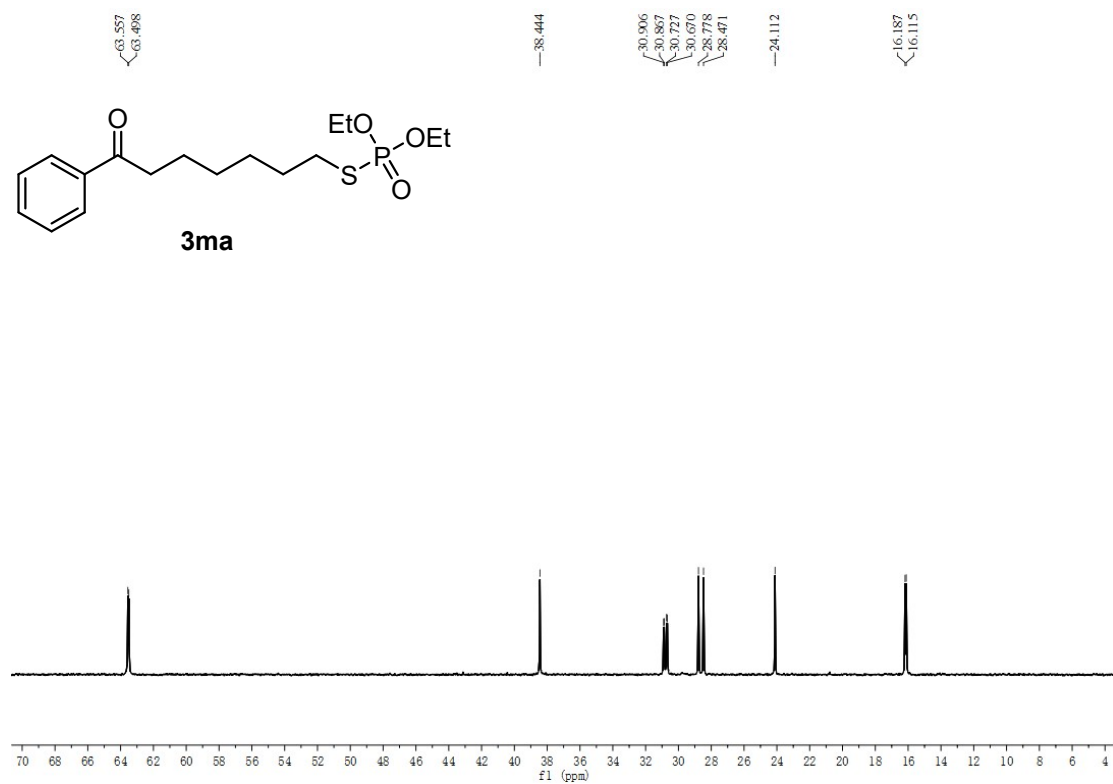

$^{31}\text{P}$  NMR (162 MHz,  $\text{CDCl}_3$ ),  $^1\text{H}$  NMR (400 MHz,  $\text{CDCl}_3$ ) and  $^{13}\text{C}$  NMR (100 MHz,  $\text{CDCl}_3$ ) spectra of product **3na**

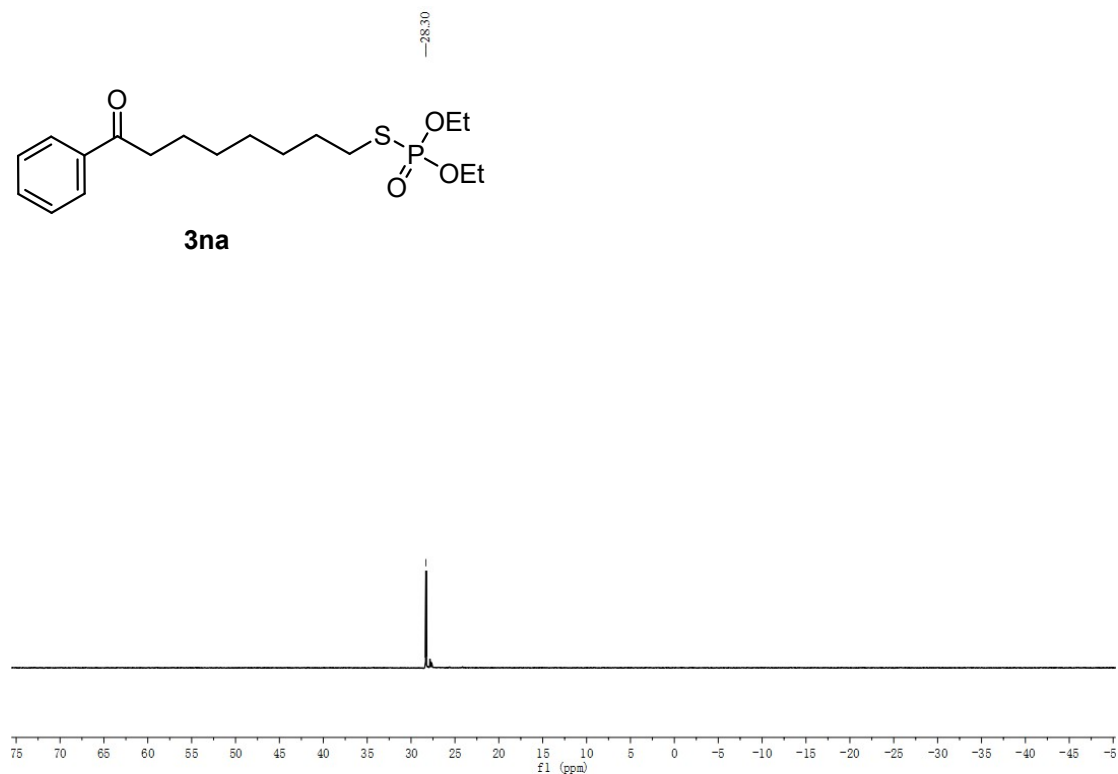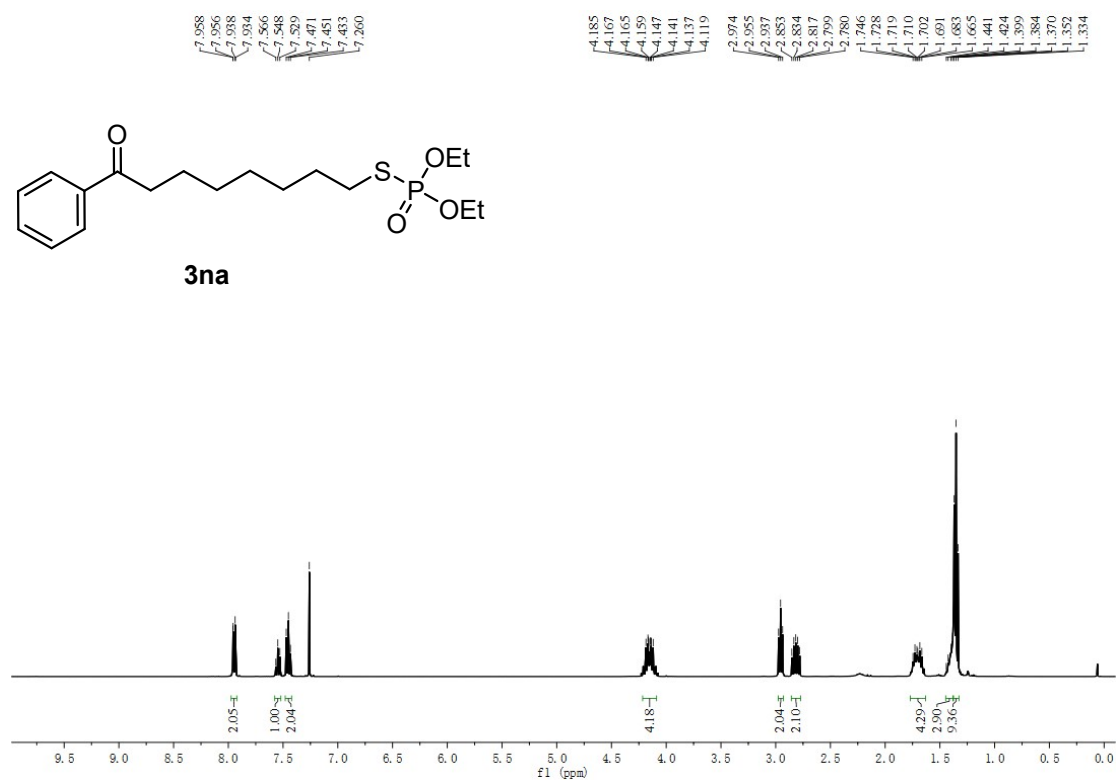

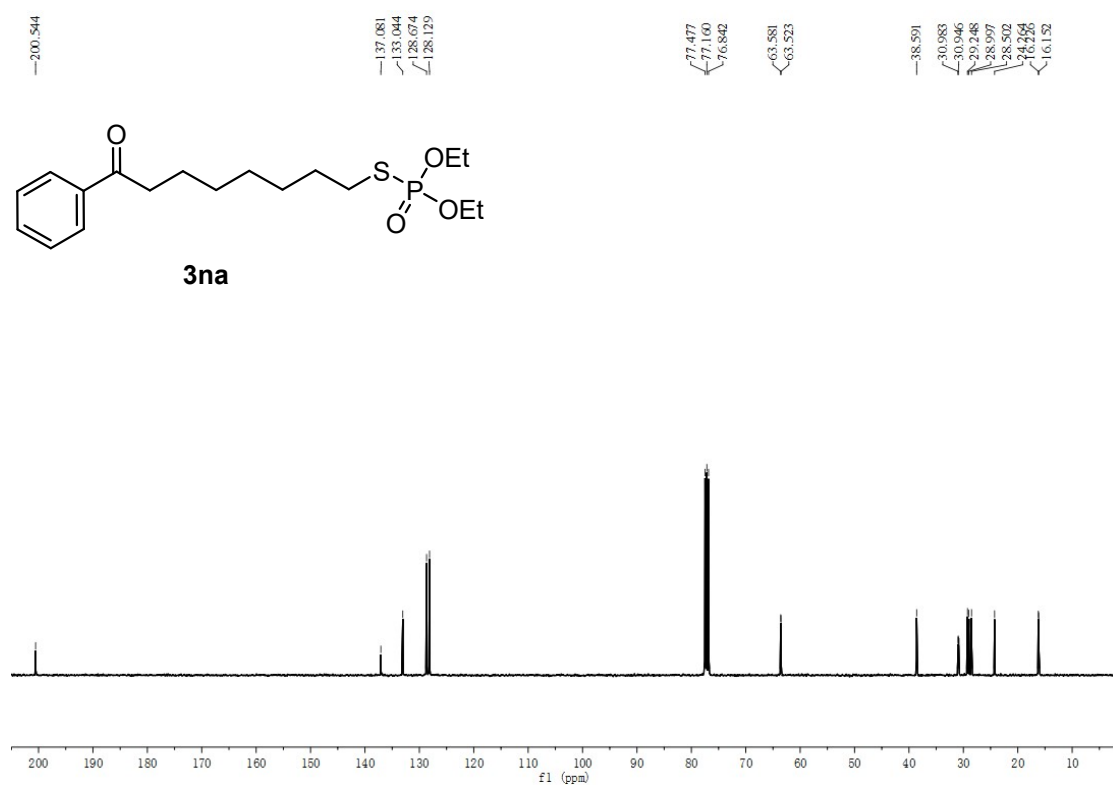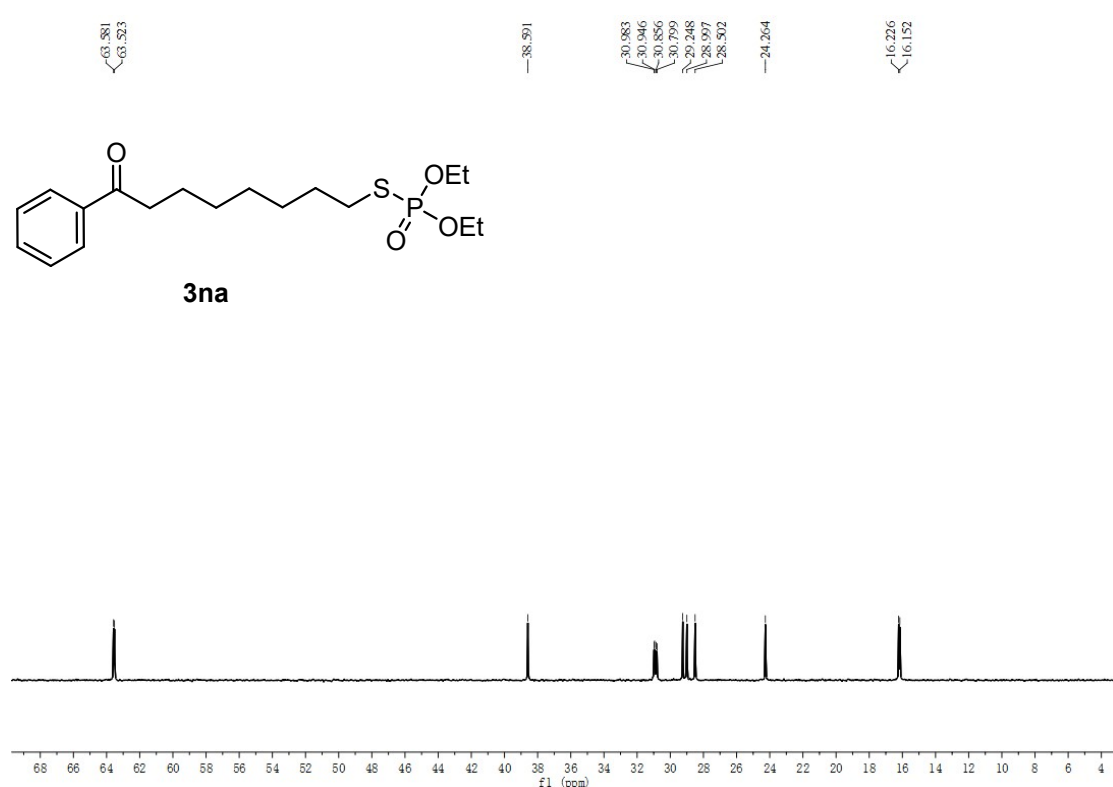

$^{31}\text{P}$  NMR (162 MHz,  $\text{CDCl}_3$ ),  $^1\text{H}$  NMR (400 MHz,  $\text{CDCl}_3$ ) and  $^{13}\text{C}$  NMR (100 MHz,  $\text{CDCl}_3$ ) spectra of product **30a**

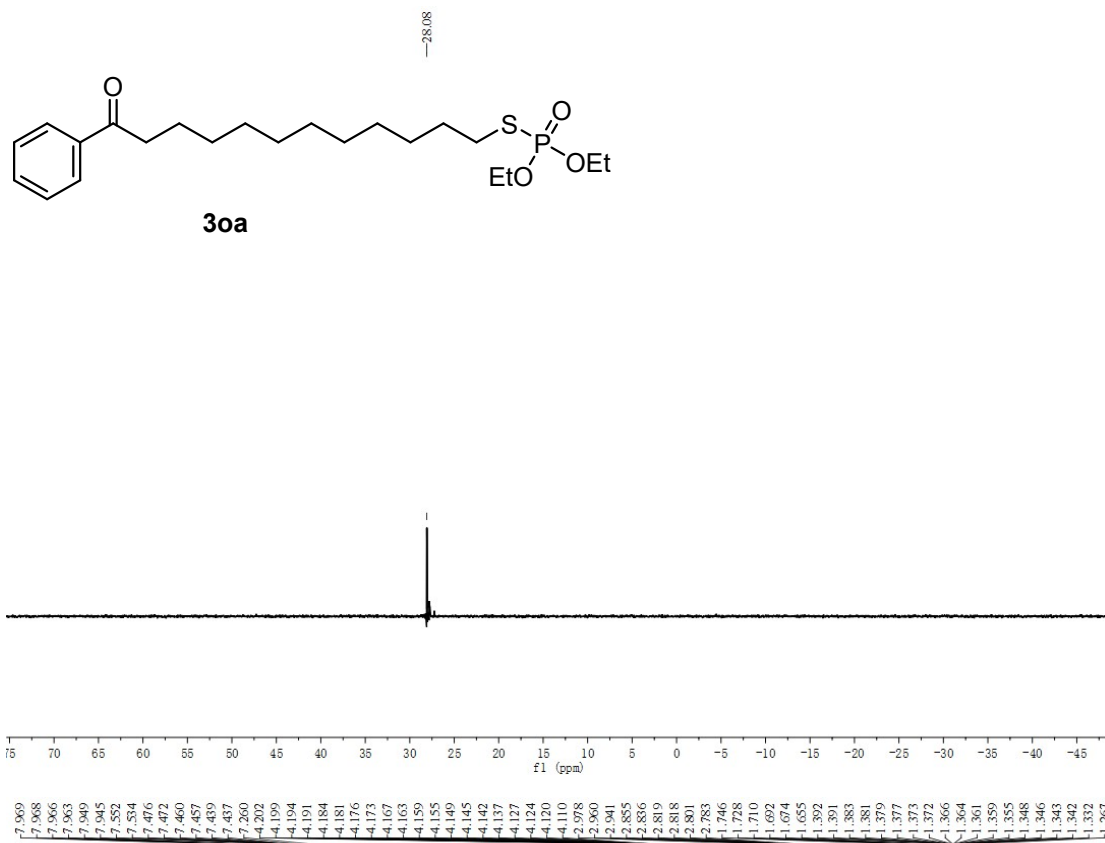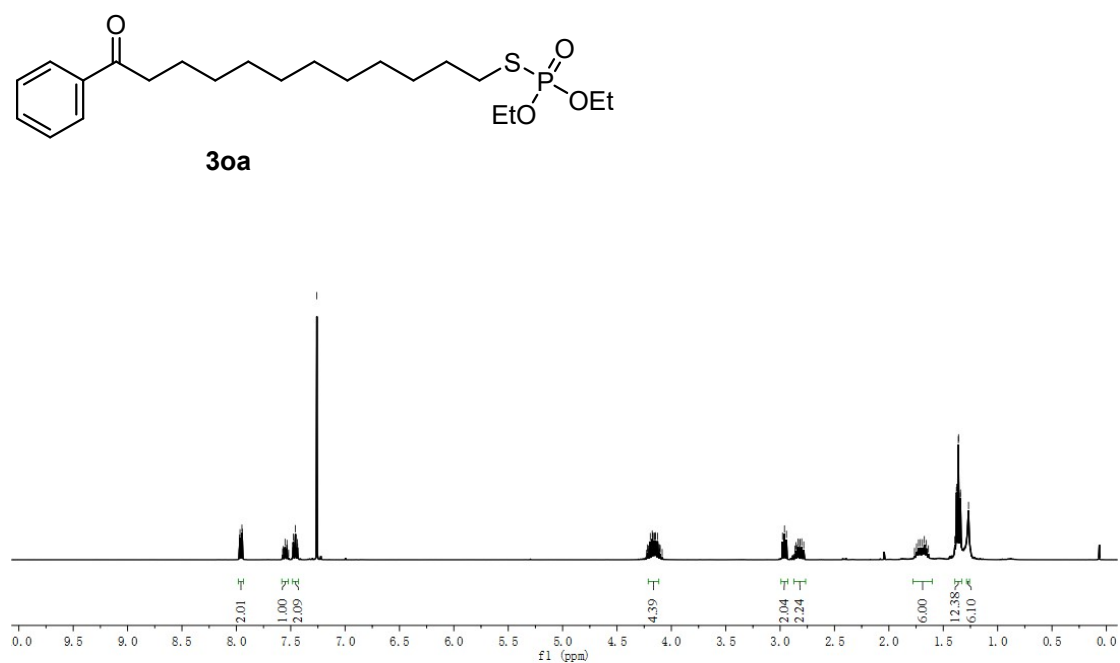

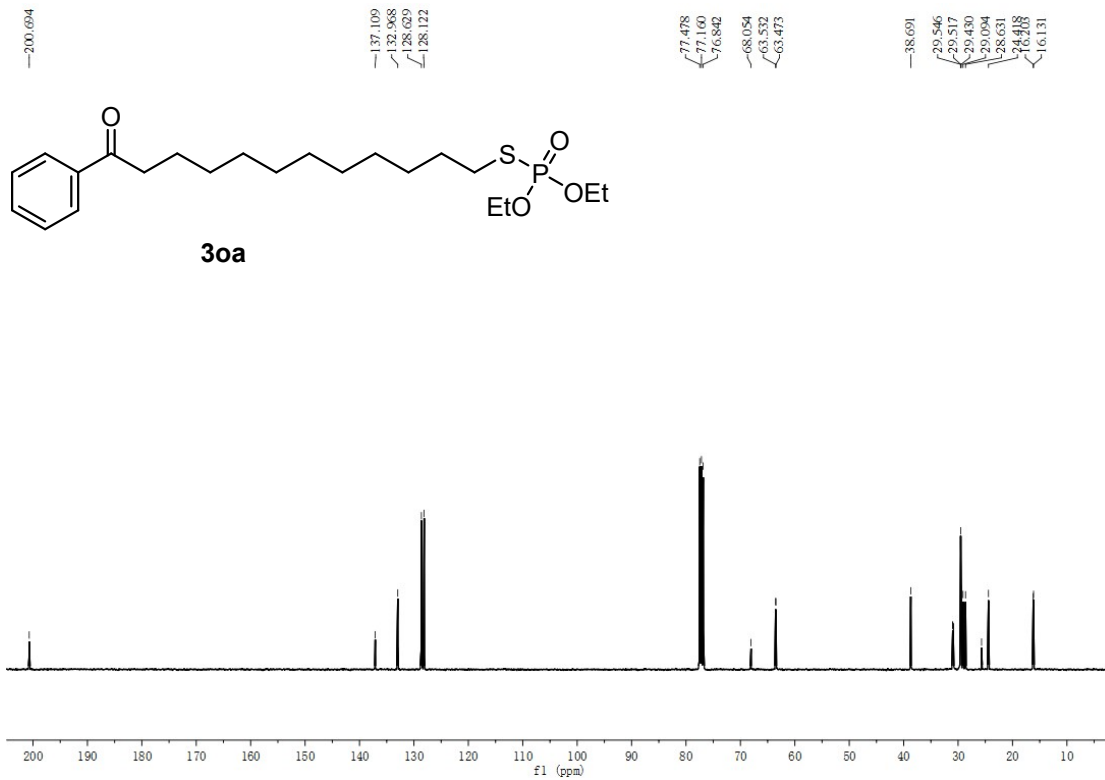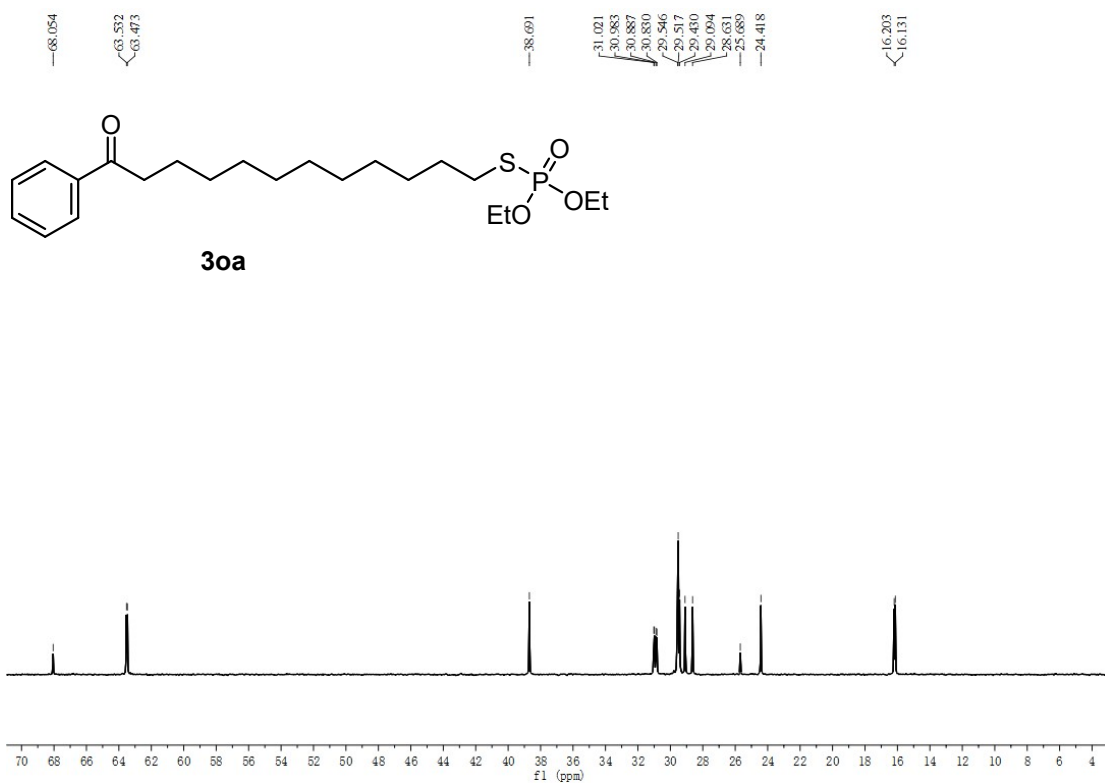



$^{31}\text{P}$  NMR (162 MHz,  $\text{CDCl}_3$ ),  $^1\text{H}$  NMR (400 MHz,  $\text{CDCl}_3$ ) and  $^{13}\text{C}$  NMR (100 MHz,  $\text{CDCl}_3$ ) spectra of product **3pa**

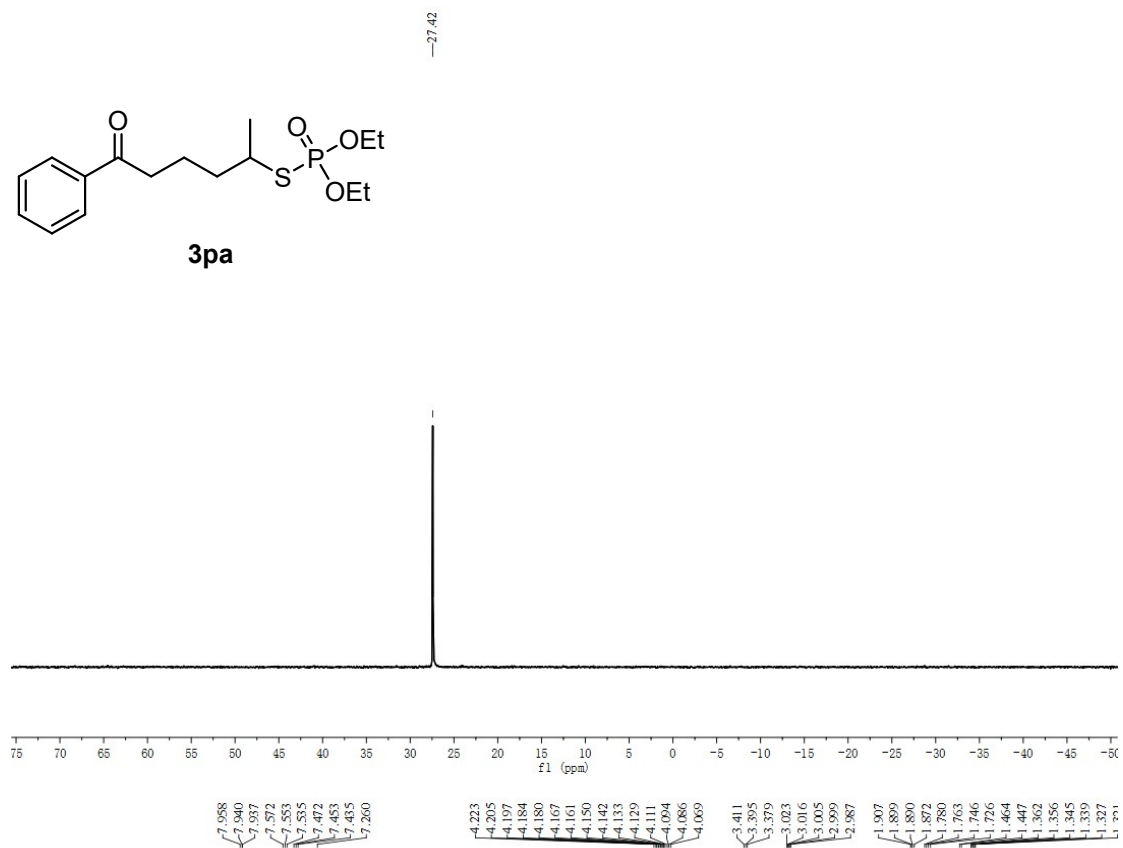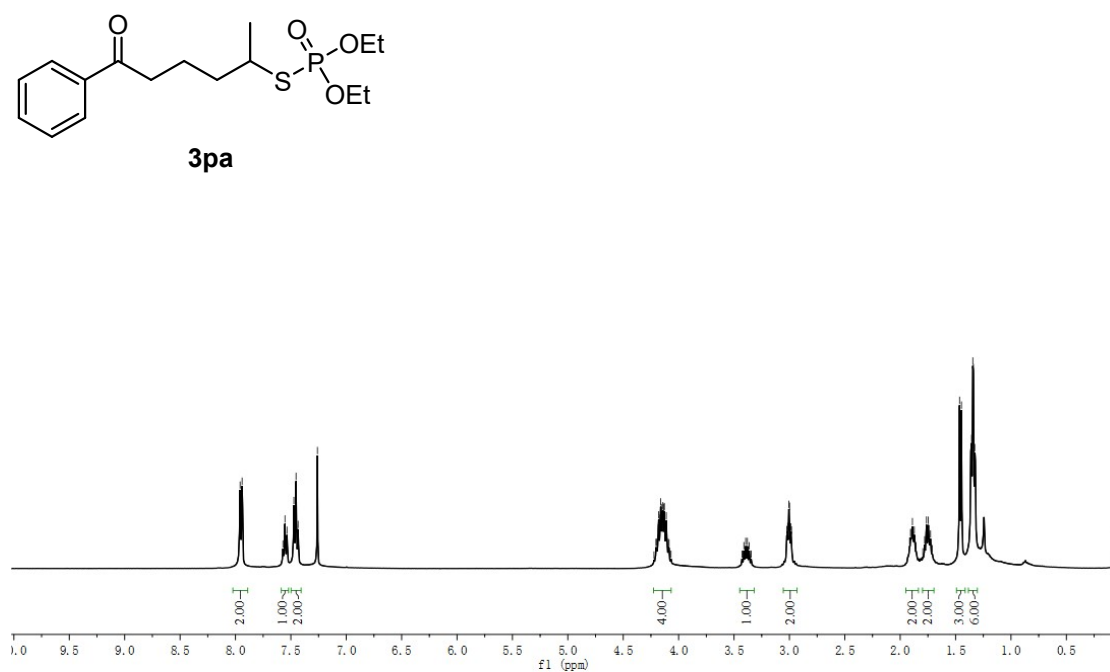

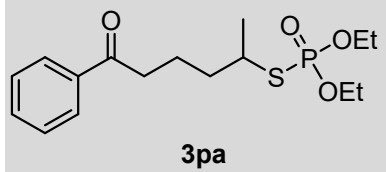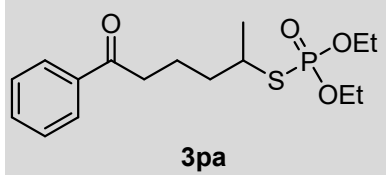

$^{31}\text{P}$  NMR (162 MHz,  $\text{CDCl}_3$ ),  $^1\text{H}$  NMR (400 MHz,  $\text{CDCl}_3$ ) and  $^{13}\text{C}$  NMR (100 MHz,  $\text{CDCl}_3$ ) spectra of product **3qa**

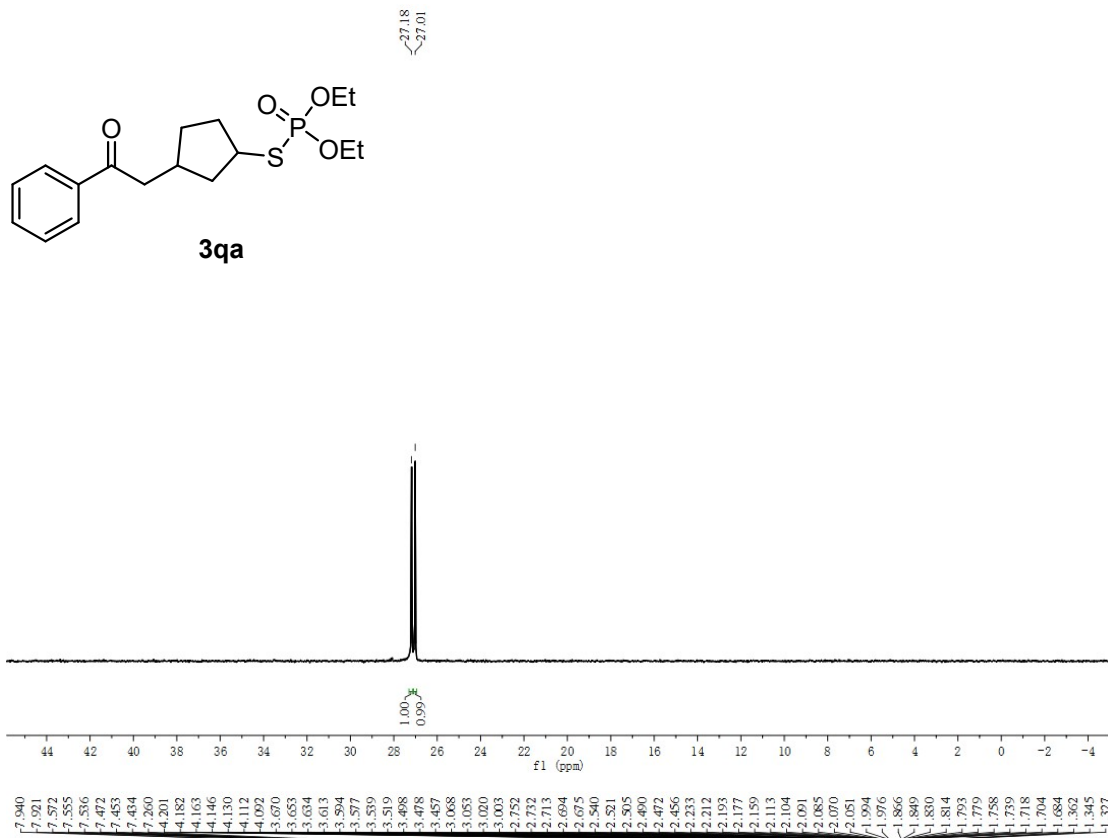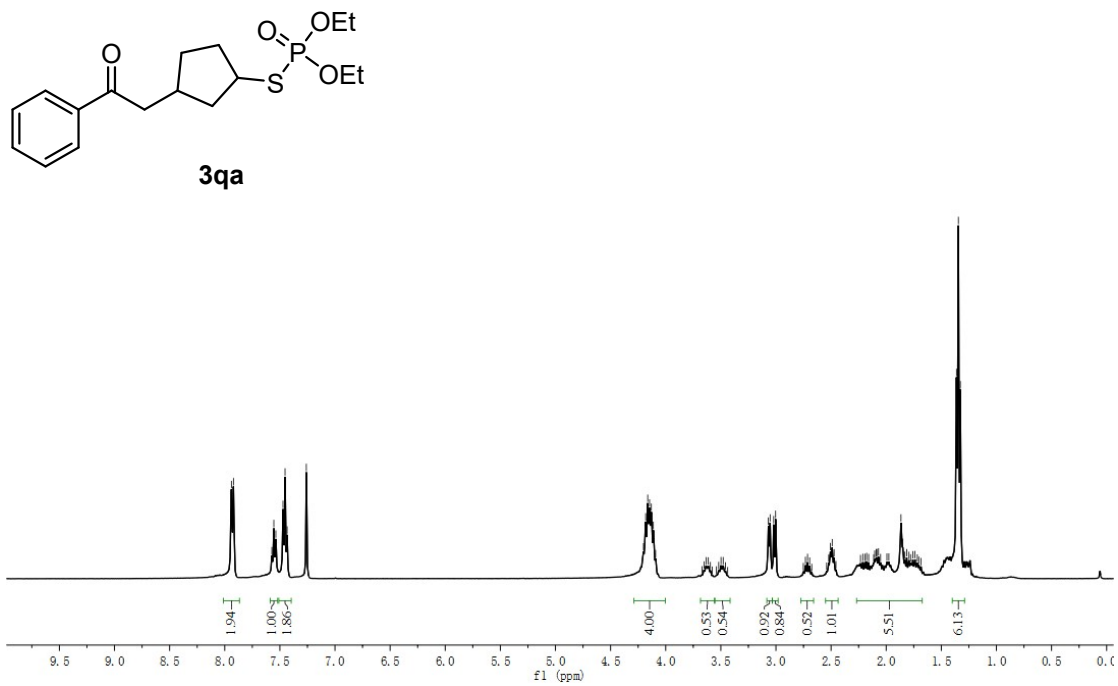

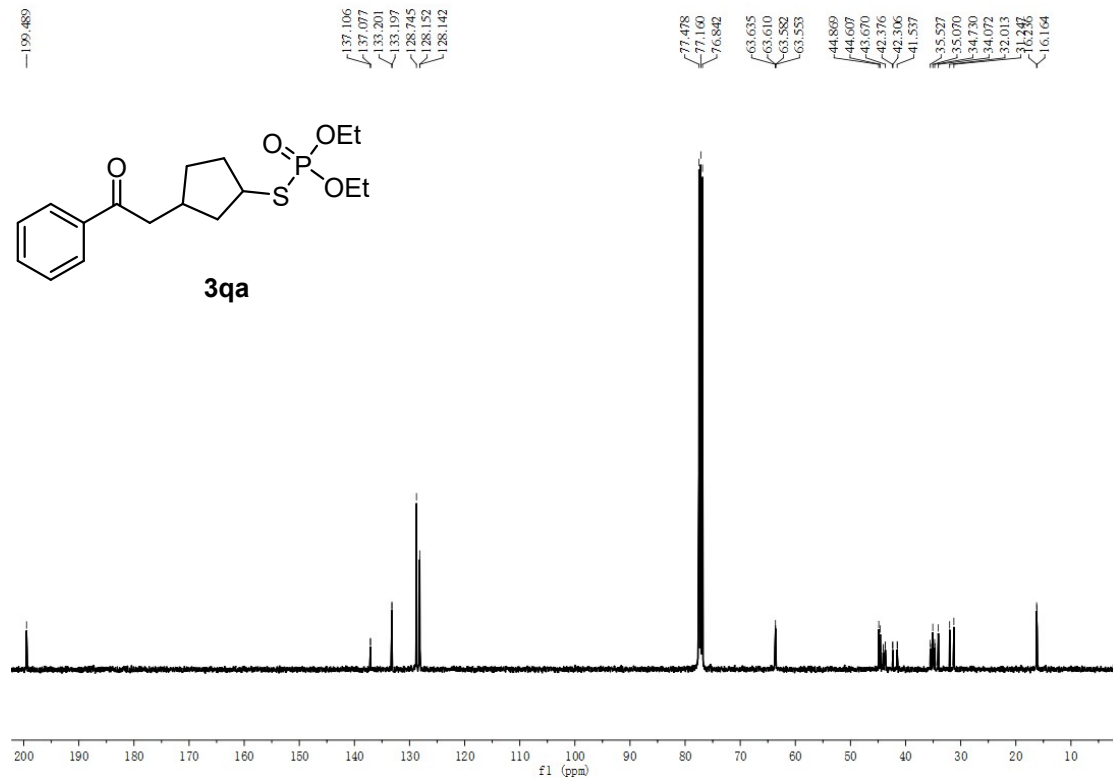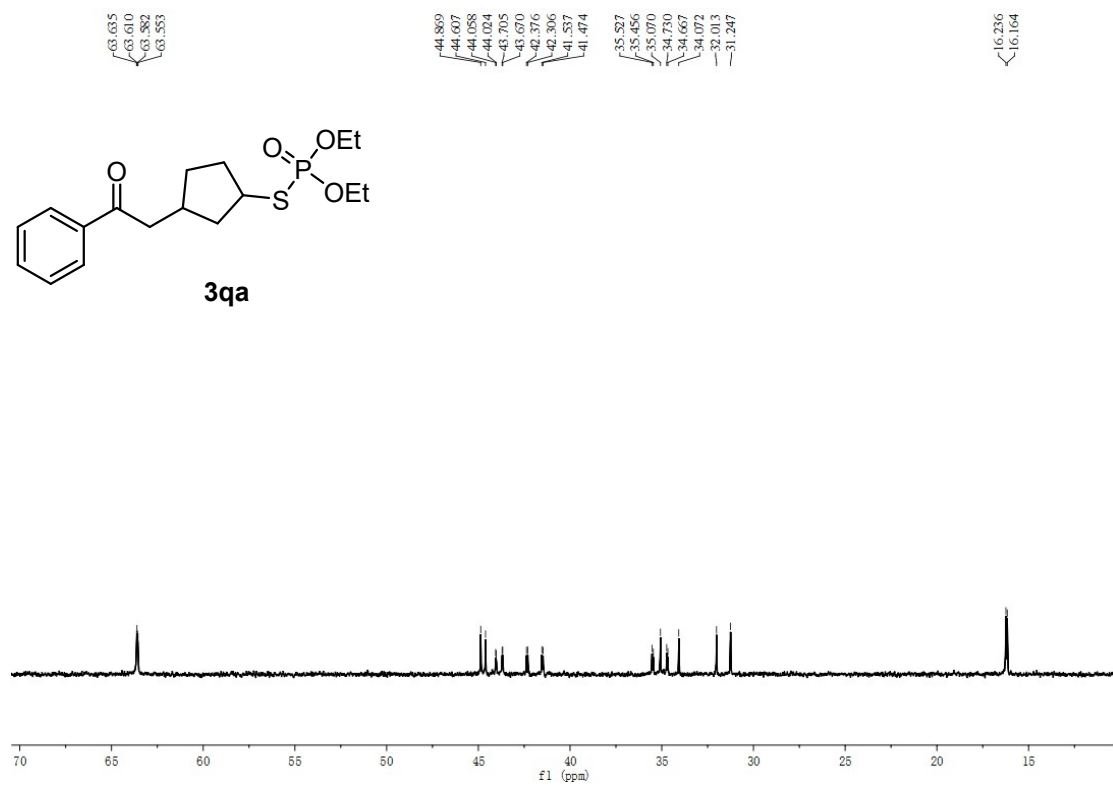

$^{31}\text{P}$  NMR (162 MHz,  $\text{CDCl}_3$ ),  $^1\text{H}$  NMR (400 MHz,  $\text{CDCl}_3$ ) and  $^{13}\text{C}$  NMR (100 MHz,  $\text{CDCl}_3$ ) spectra of product **3ra**

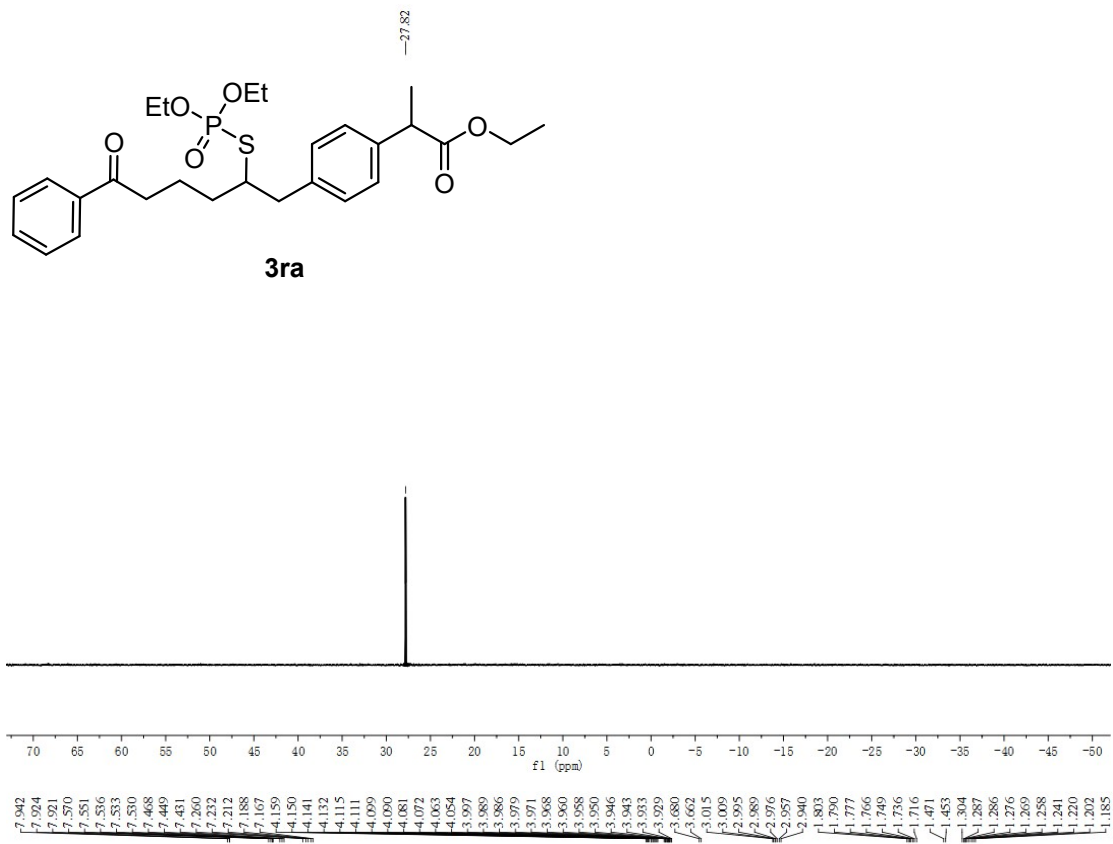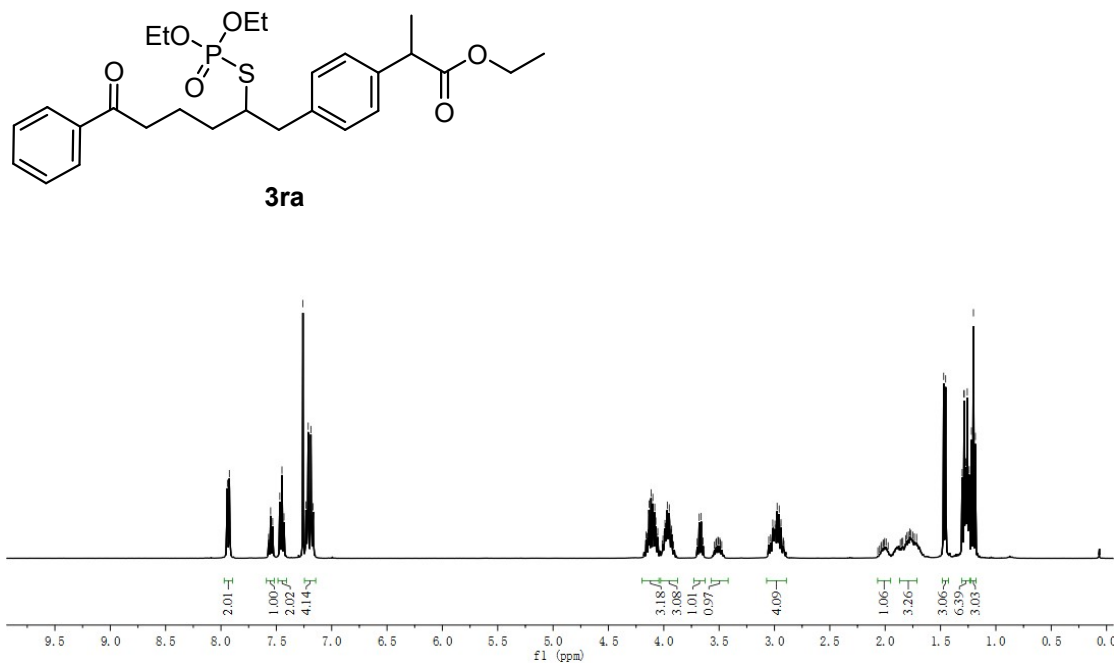

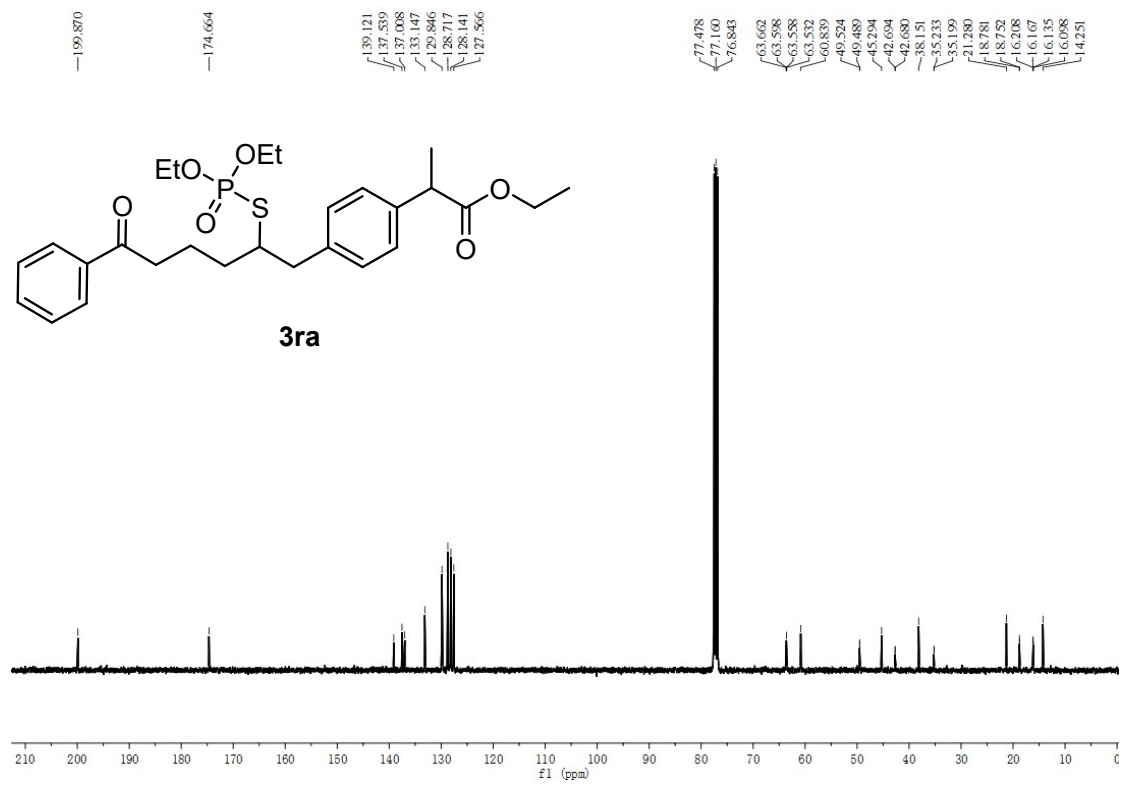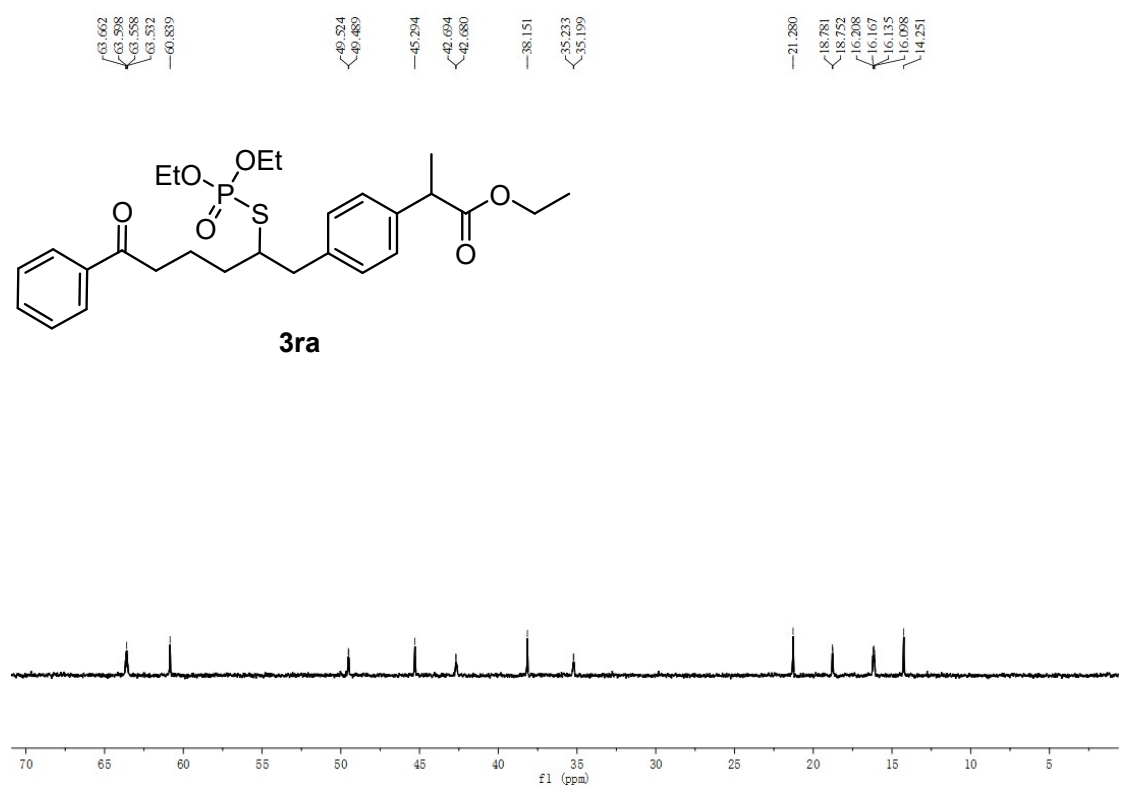

$^{31}\text{P}$  NMR (162 MHz,  $\text{CDCl}_3$ ),  $^1\text{H}$  NMR (400 MHz,  $\text{CDCl}_3$ ) and  $^{13}\text{C}$  NMR (100 MHz,  $\text{CDCl}_3$ ) spectra of product **3sa**

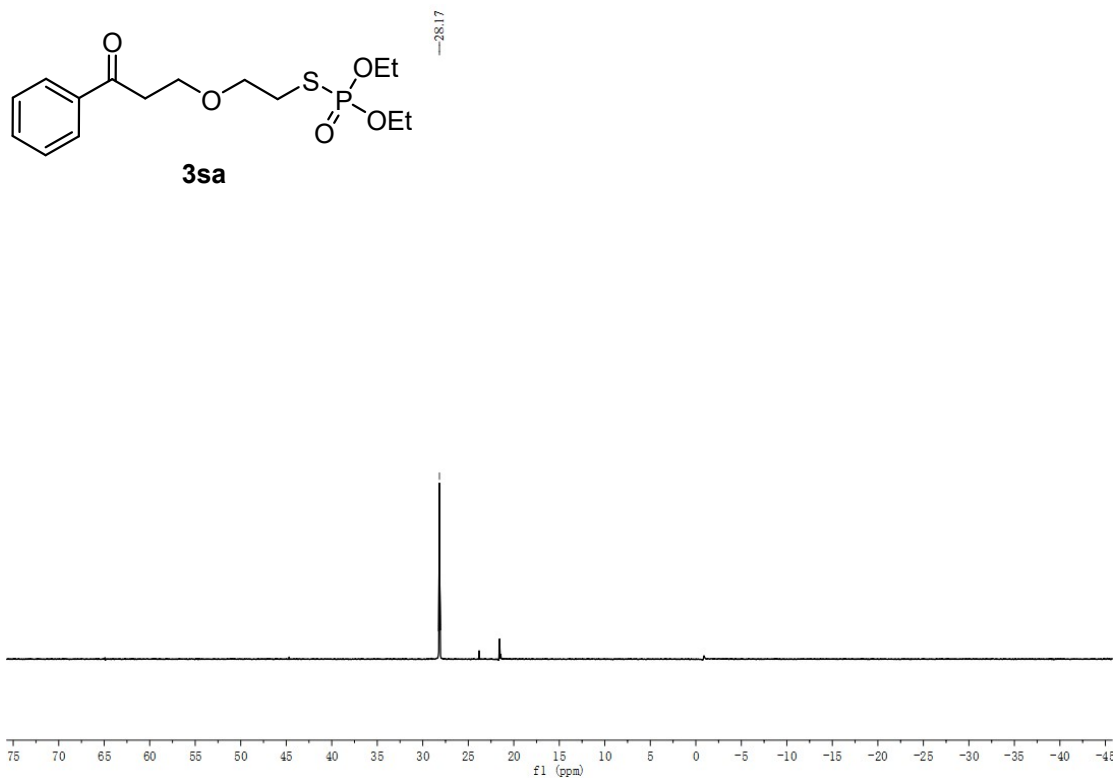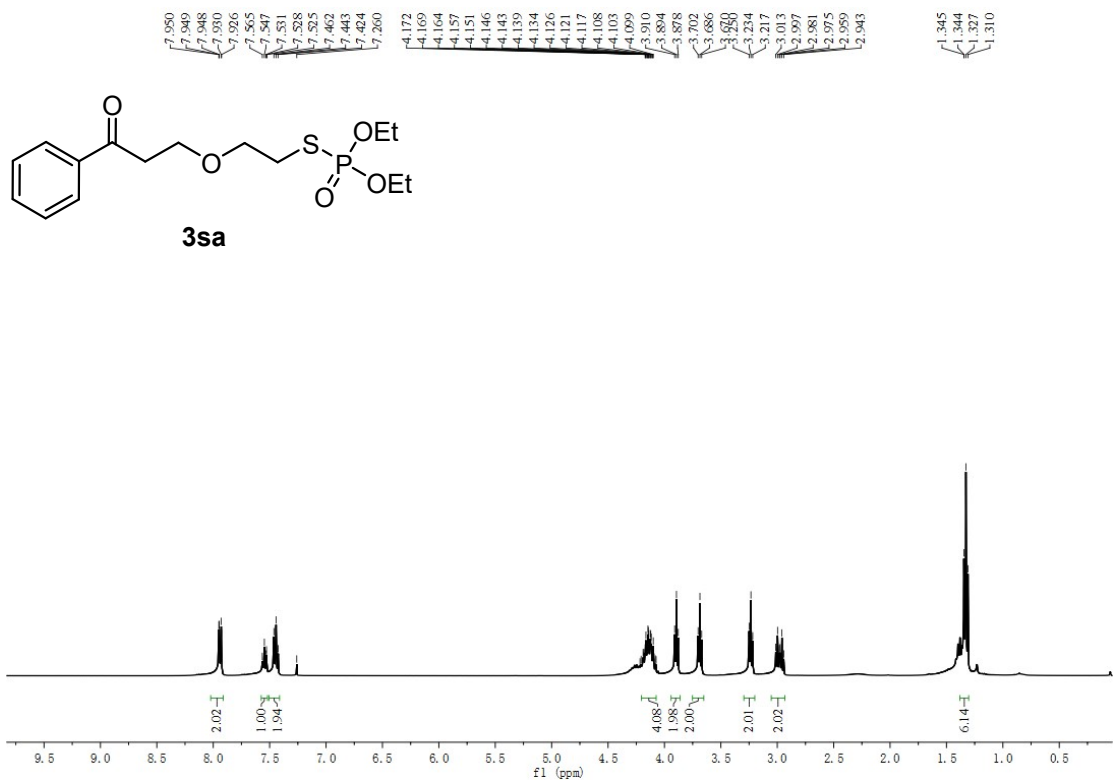

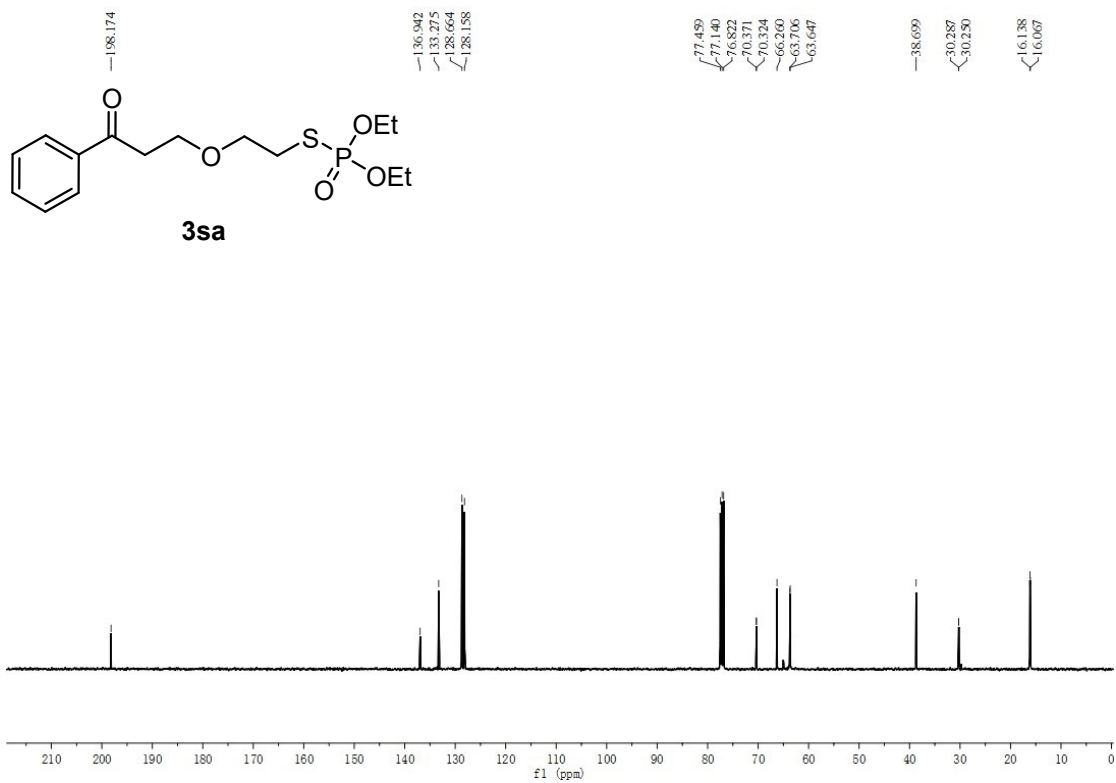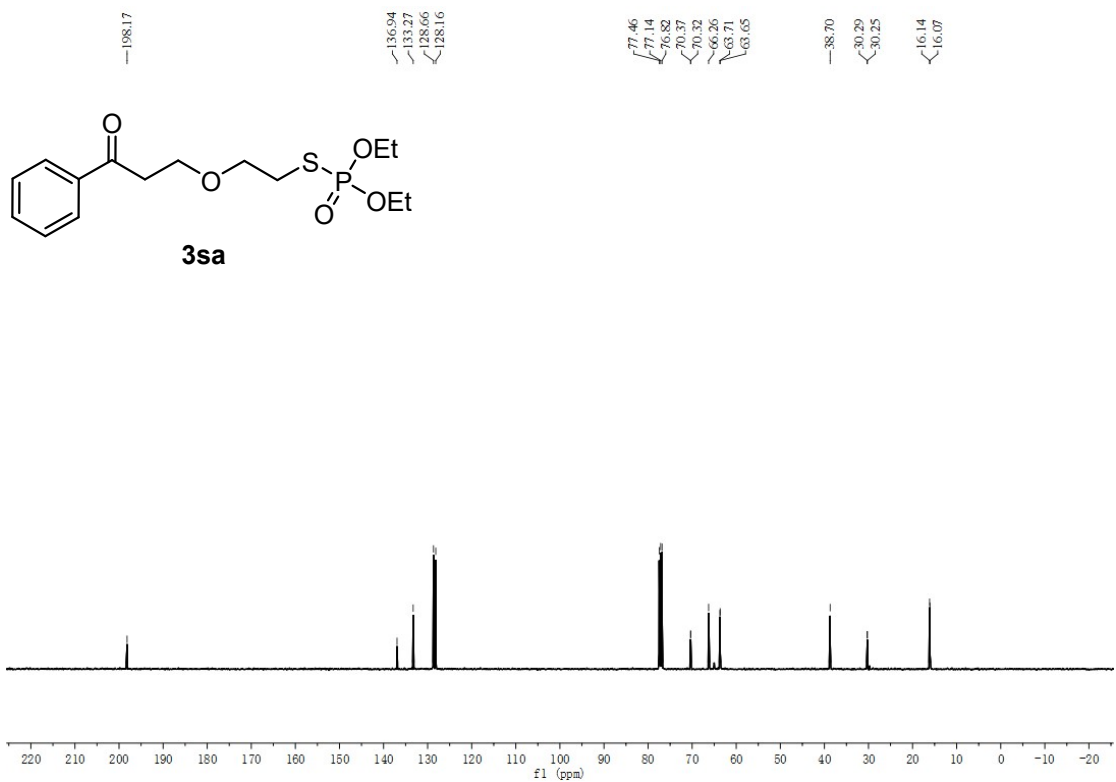



$^{31}\text{P}$  NMR (162 MHz,  $\text{CDCl}_3$ ),  $^1\text{H}$  NMR (400 MHz,  $\text{CDCl}_3$ ) and  $^{13}\text{C}$  NMR (100 MHz,  $\text{CDCl}_3$ ) spectra of product **3ab**

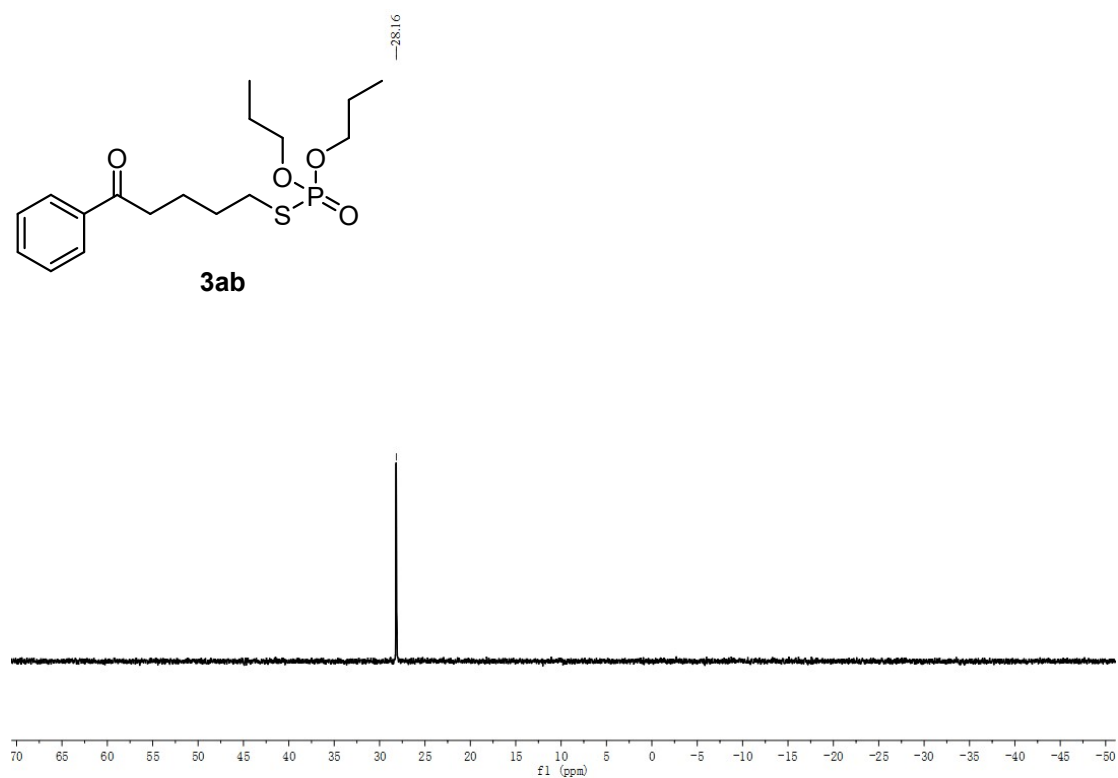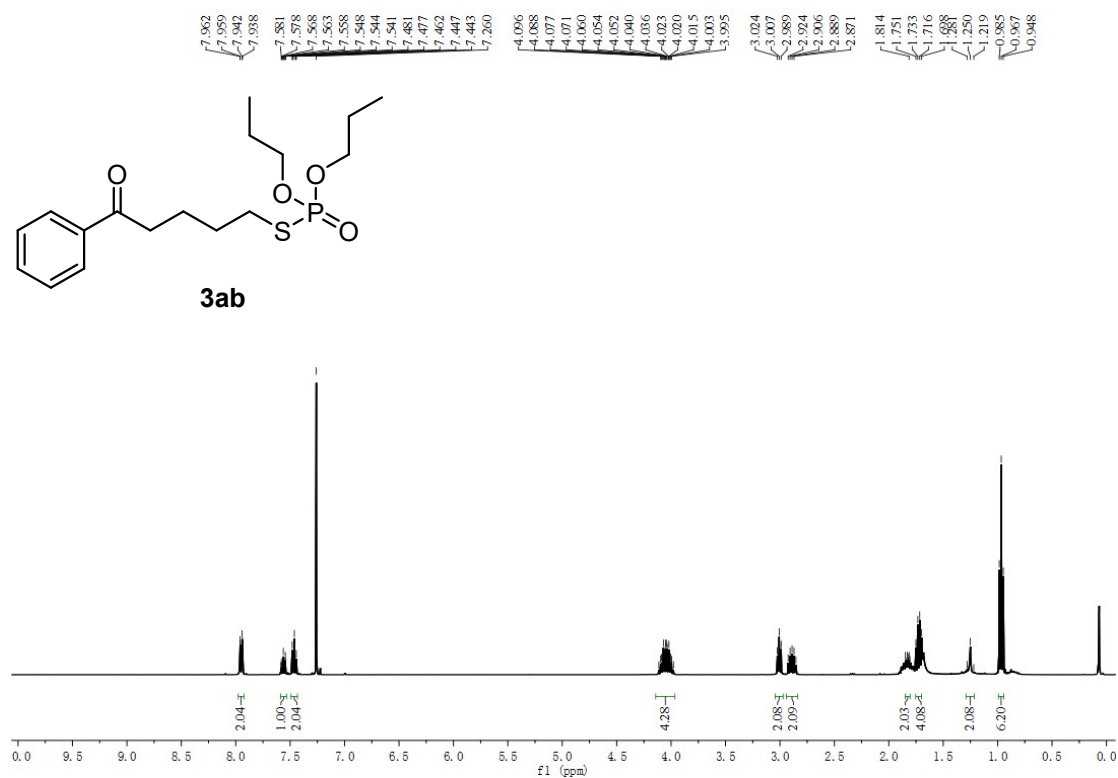

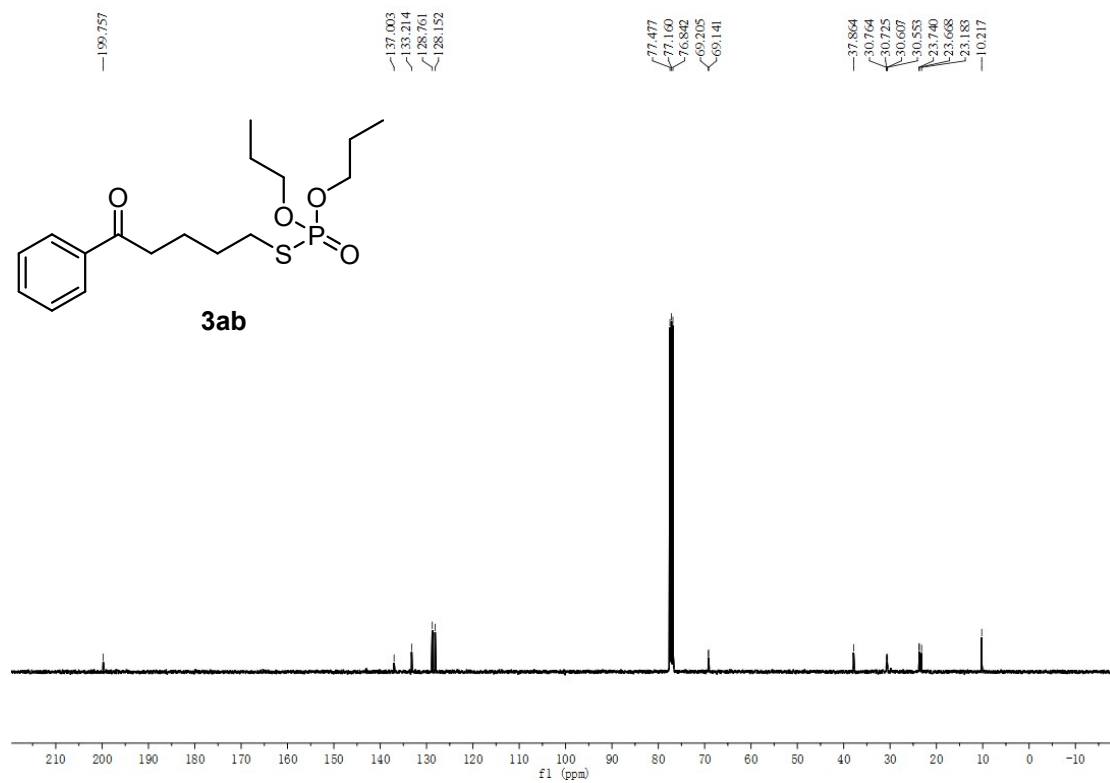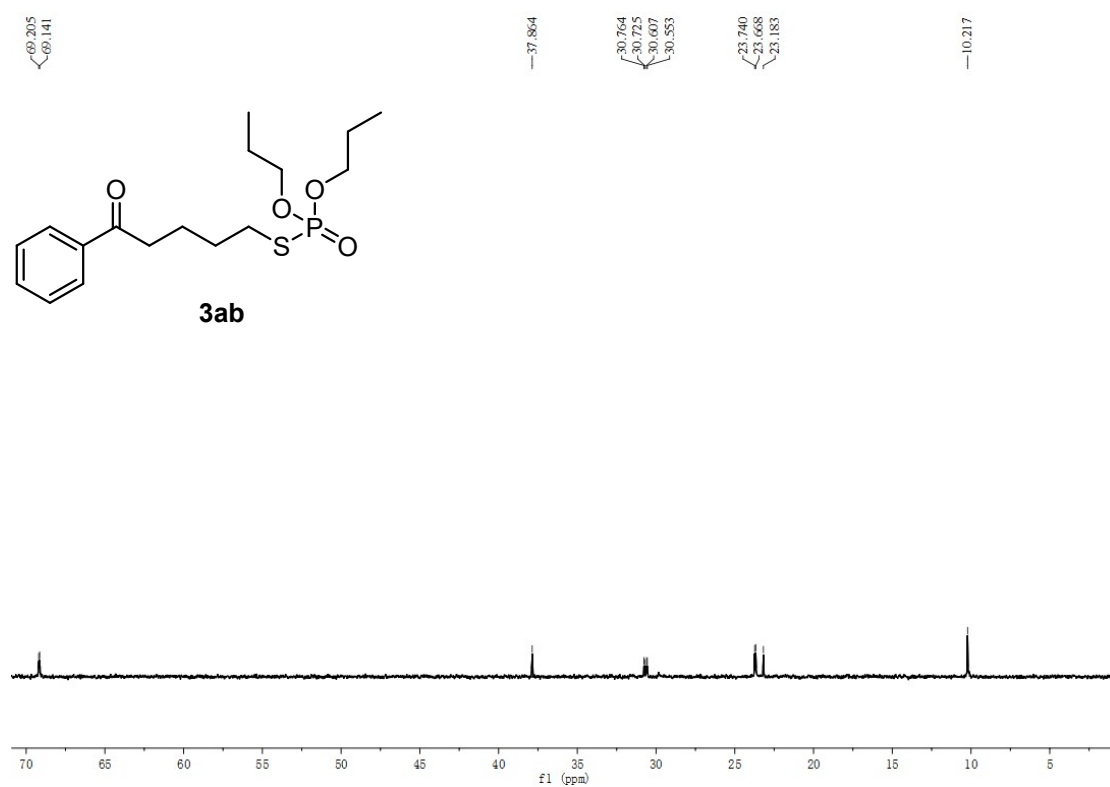

$^{31}\text{P}$  NMR (162 MHz,  $\text{CDCl}_3$ ),  $^1\text{H}$  NMR (400 MHz,  $\text{CDCl}_3$ ) and  $^{13}\text{C}$  NMR (100 MHz,  $\text{CDCl}_3$ ) spectra of product **3ac**

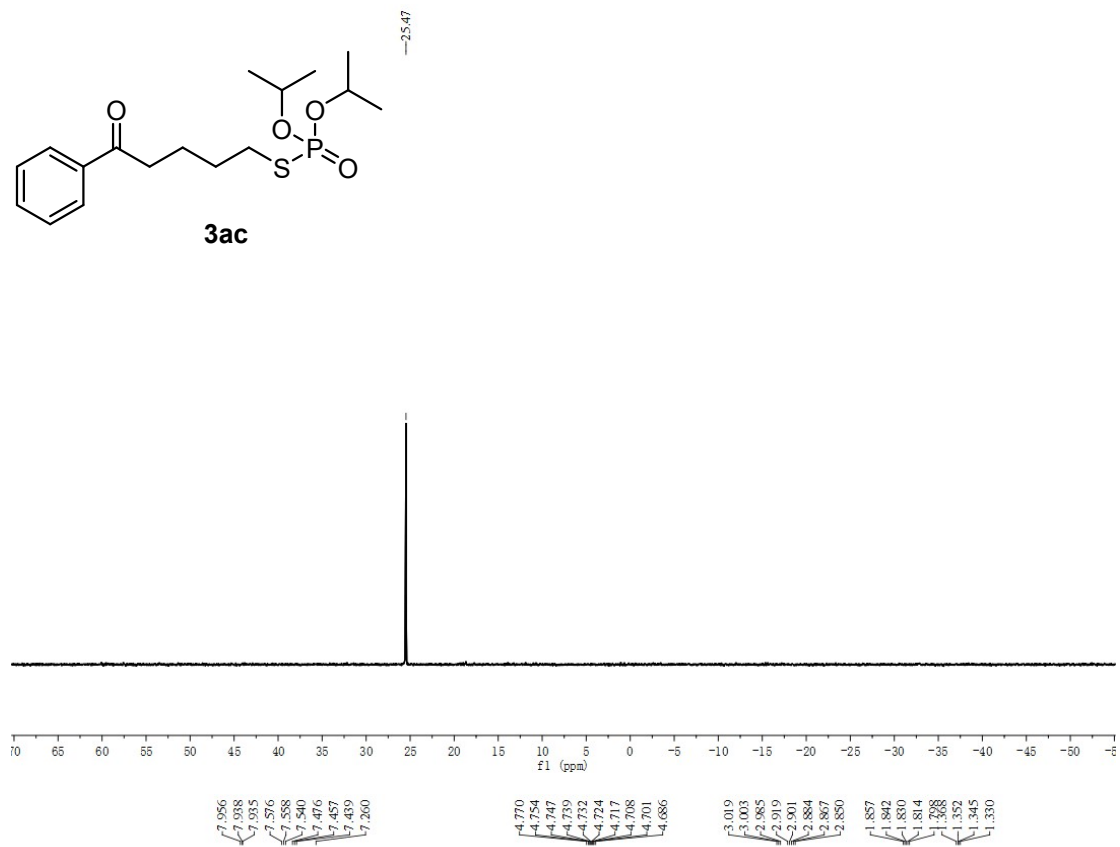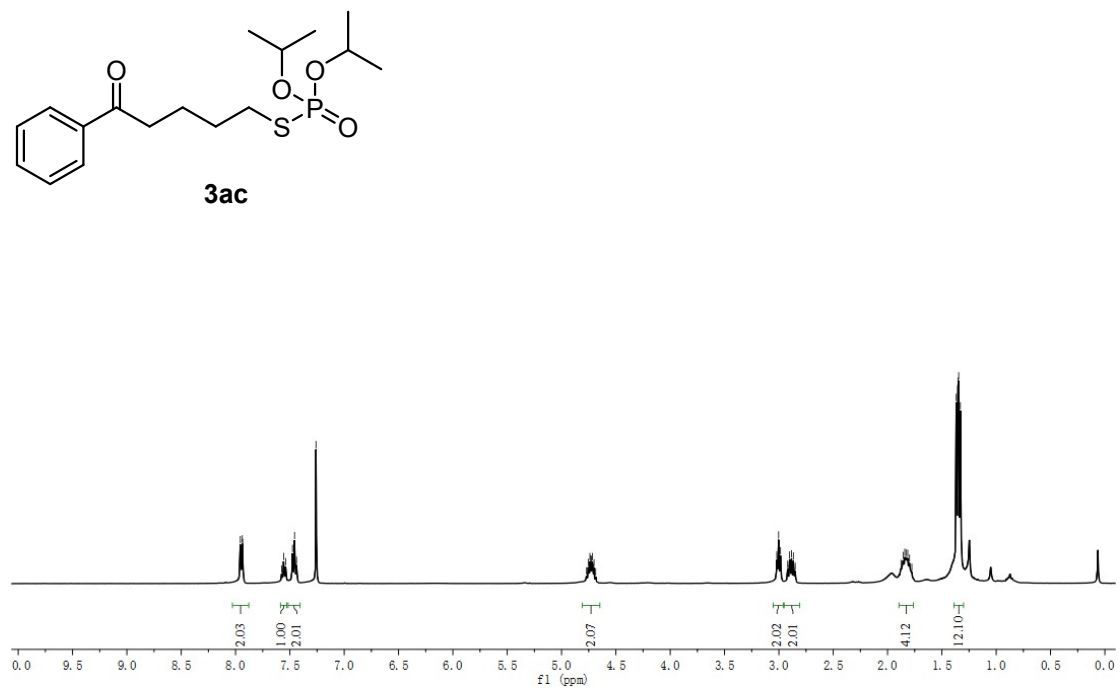

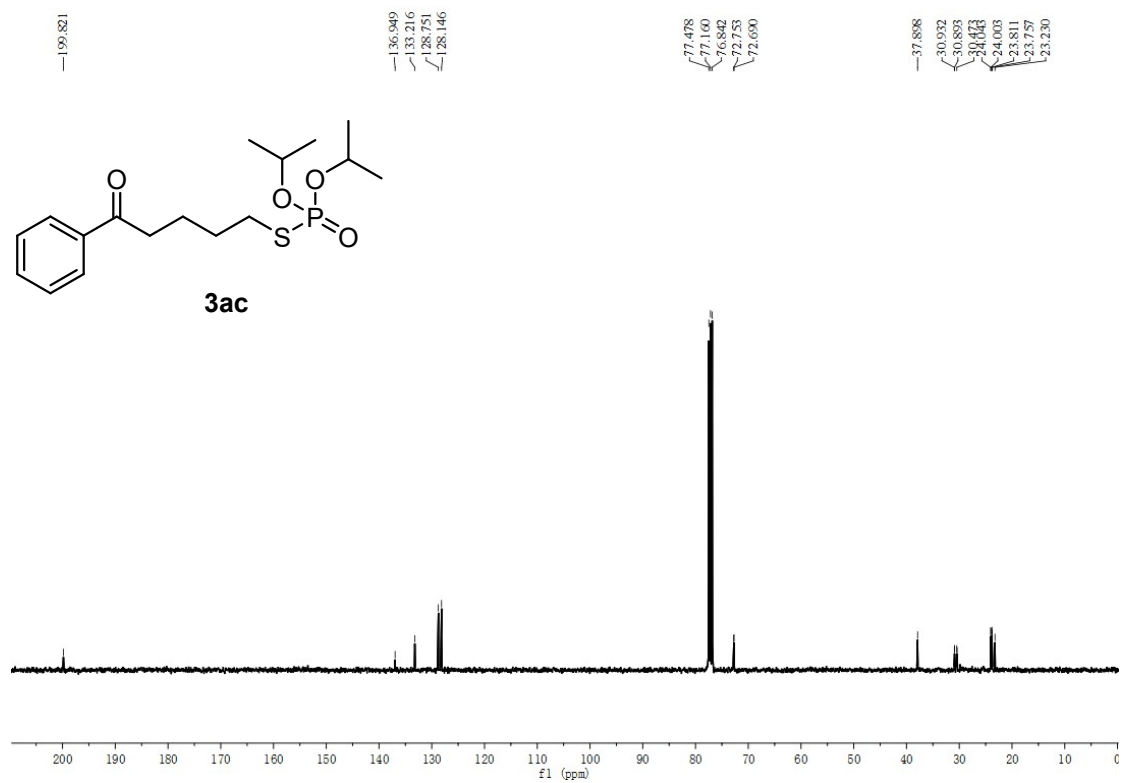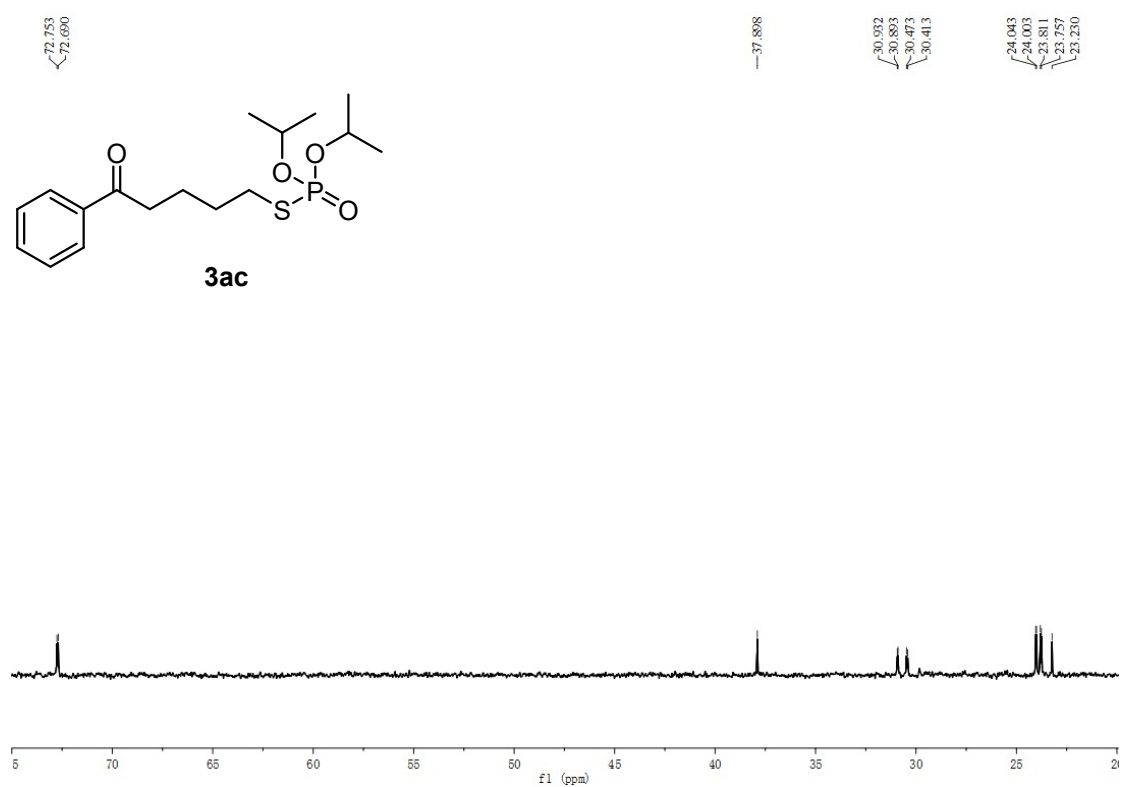

$^{31}\text{P}$  NMR (162 MHz,  $\text{CDCl}_3$ ),  $^1\text{H}$  NMR (400 MHz,  $\text{CDCl}_3$ ) and  $^{13}\text{C}$  NMR (100 MHz,  $\text{CDCl}_3$ ) spectra of product **3ad**

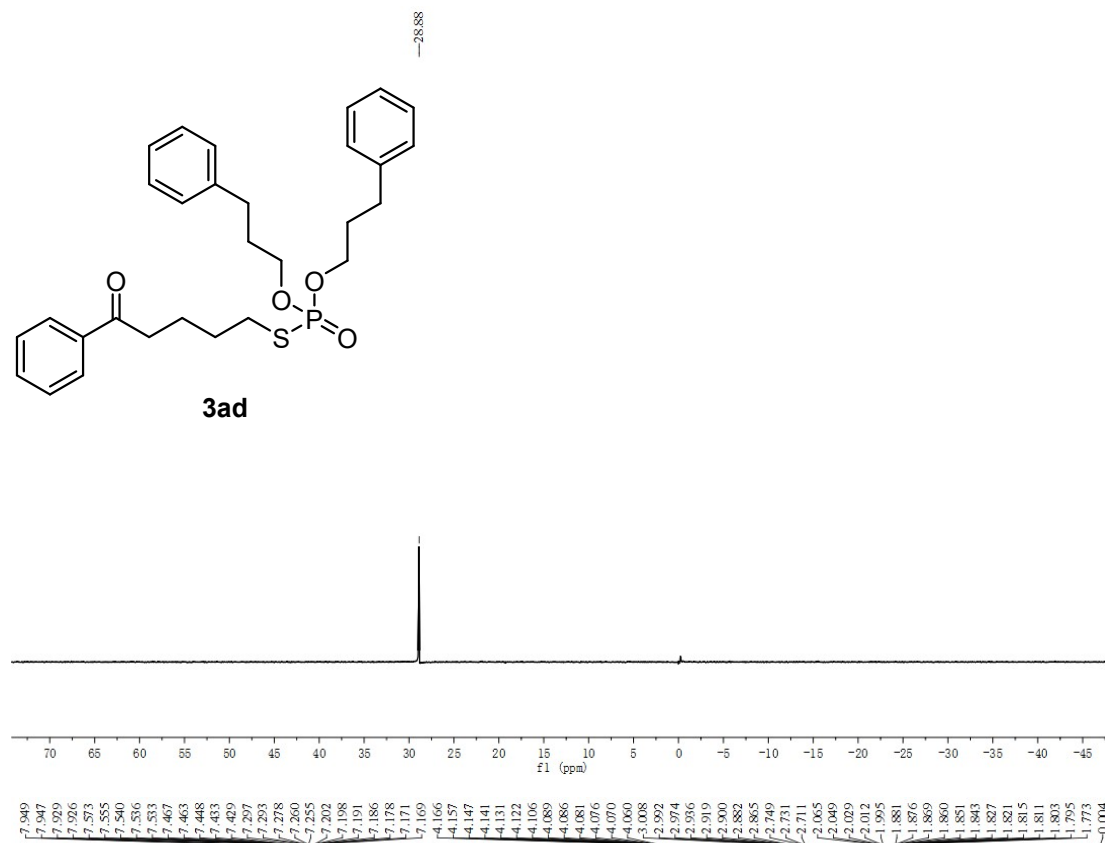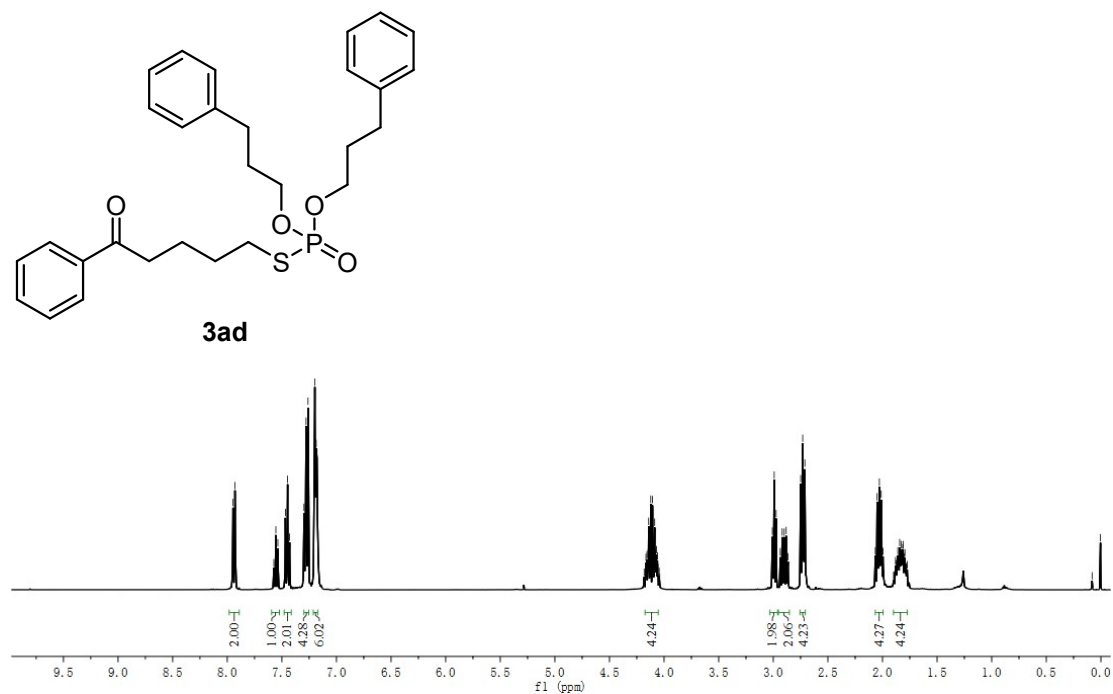

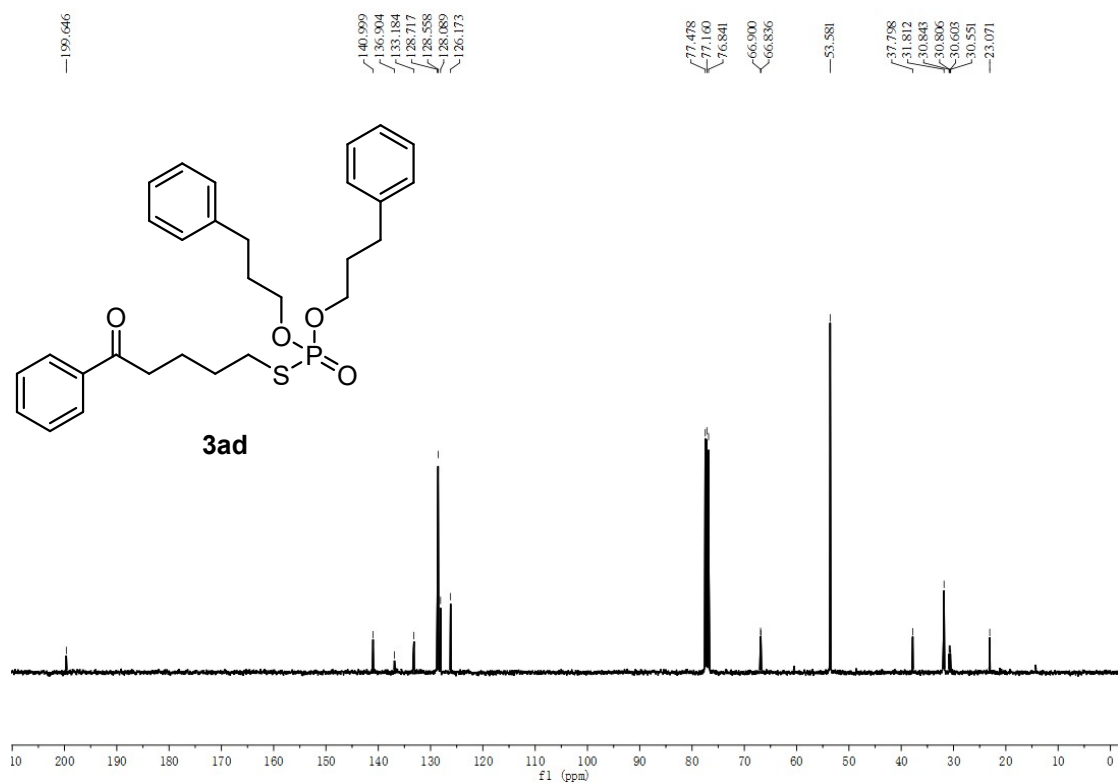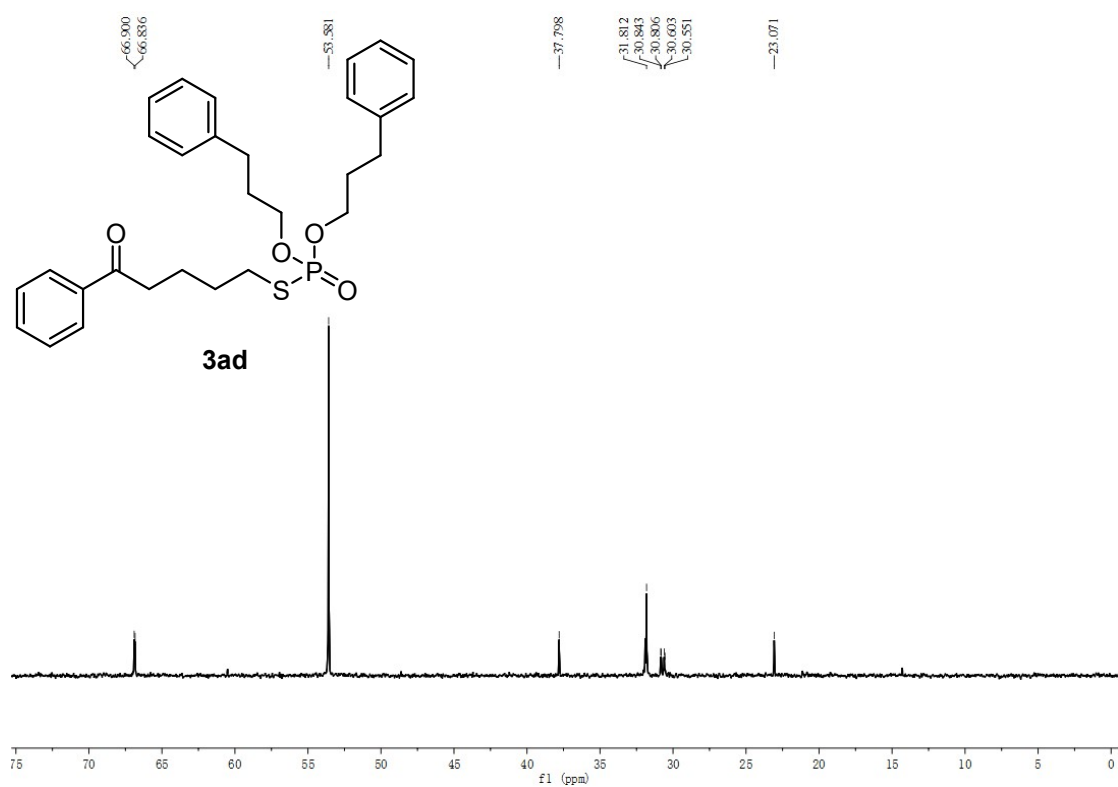

$^{31}\text{P}$  NMR (162 MHz,  $\text{CDCl}_3$ ),  $^1\text{H}$  NMR (400 MHz,  $\text{CDCl}_3$ ) and  $^{13}\text{C}$  NMR (100 MHz,  $\text{CDCl}_3$ ) spectra of product **3ae**

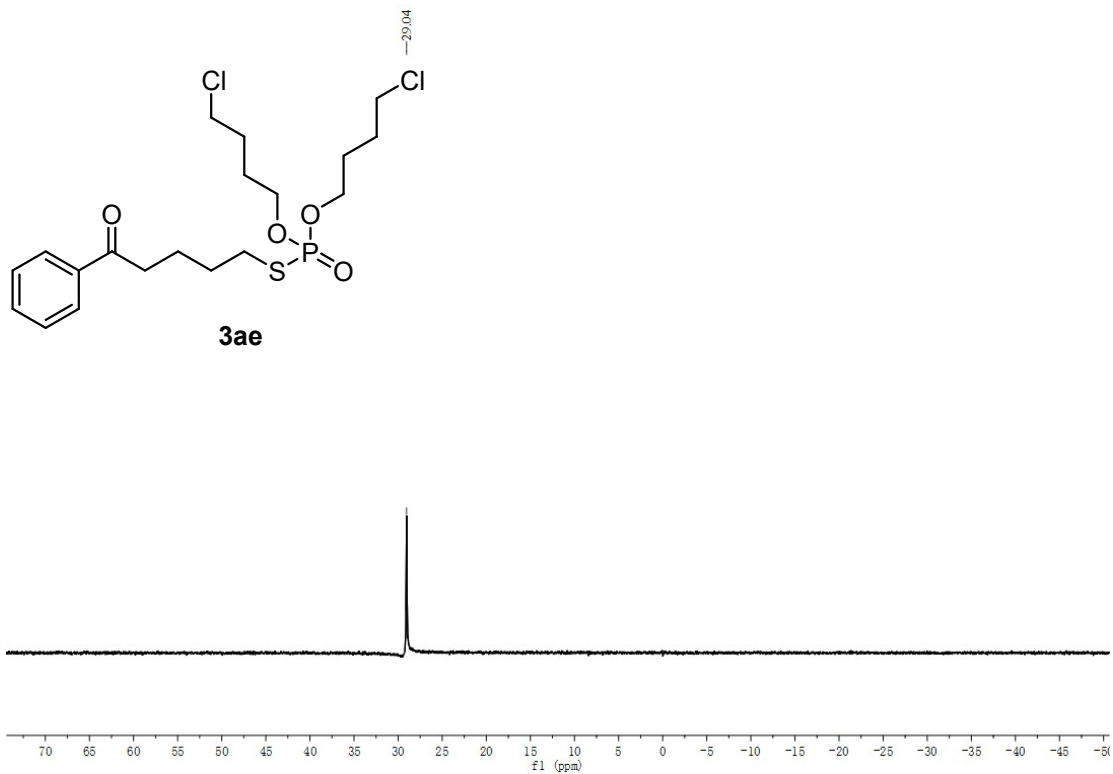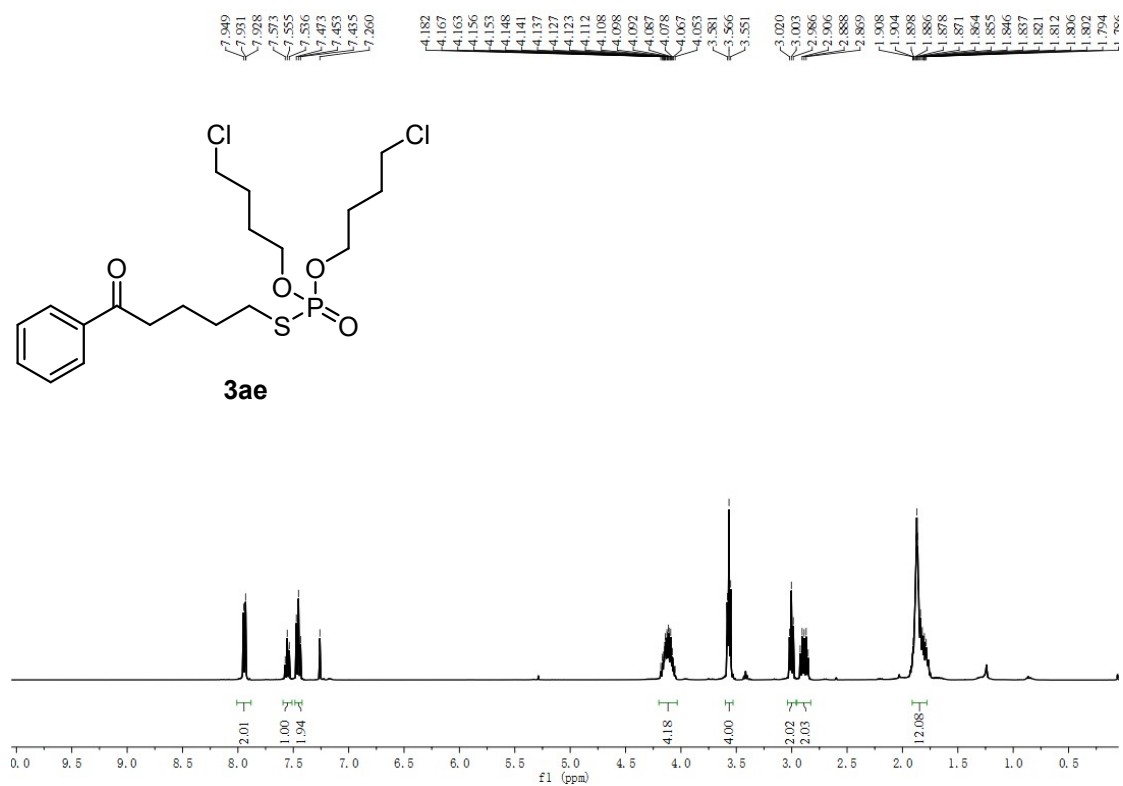

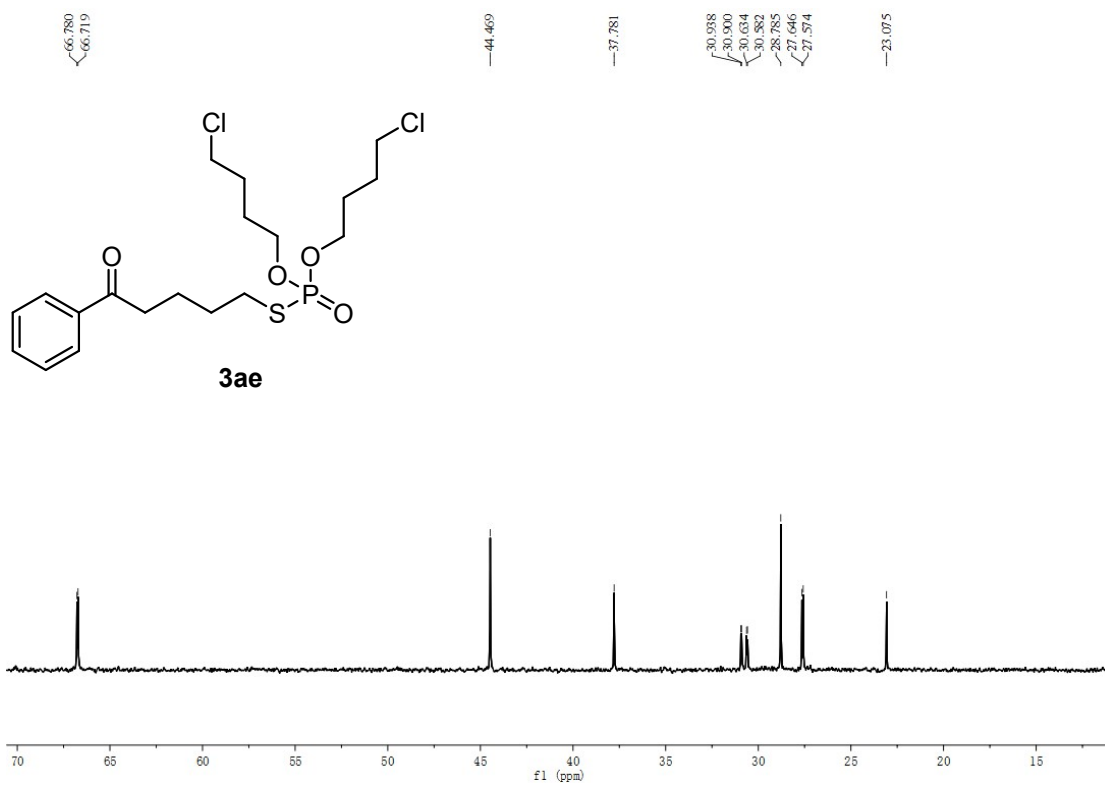



$^{31}\text{P}$  NMR (162 MHz,  $\text{CDCl}_3$ ),  $^1\text{H}$  NMR (400 MHz,  $\text{CDCl}_3$ ) and  $^{13}\text{C}$  NMR (100 MHz,  $\text{CDCl}_3$ ) spectra of product **3af**

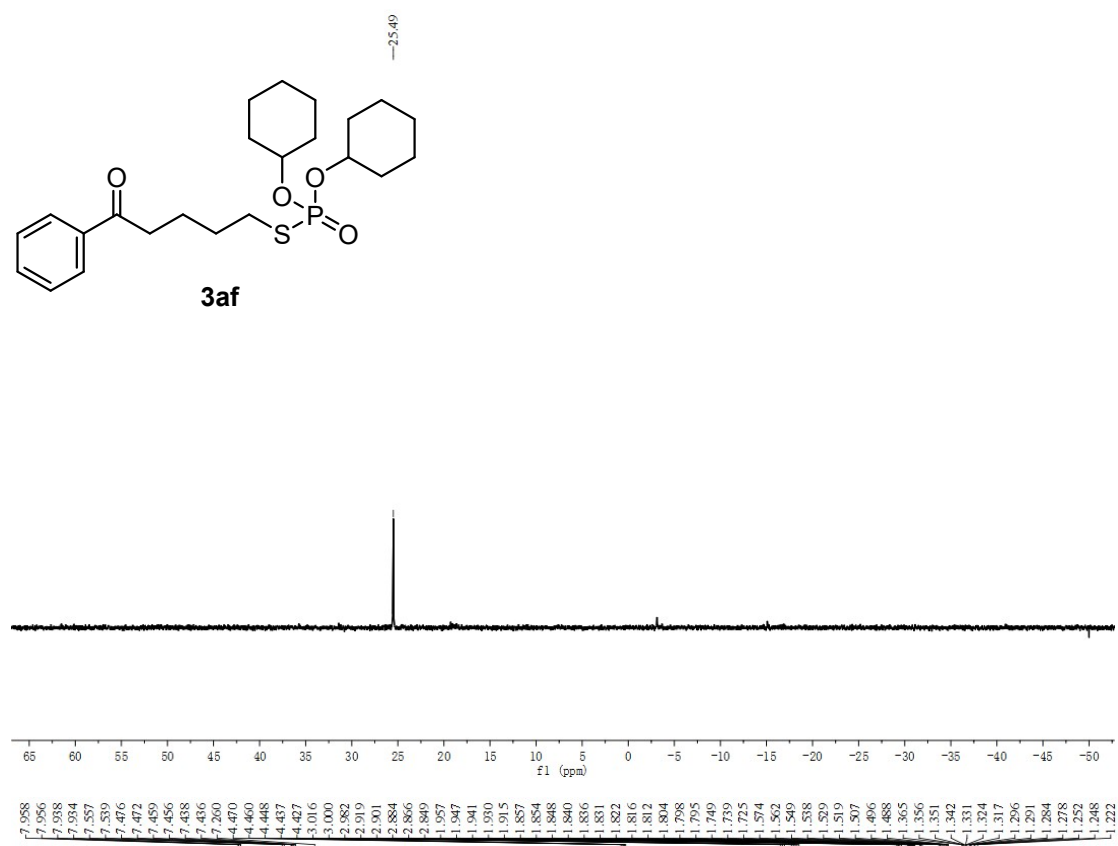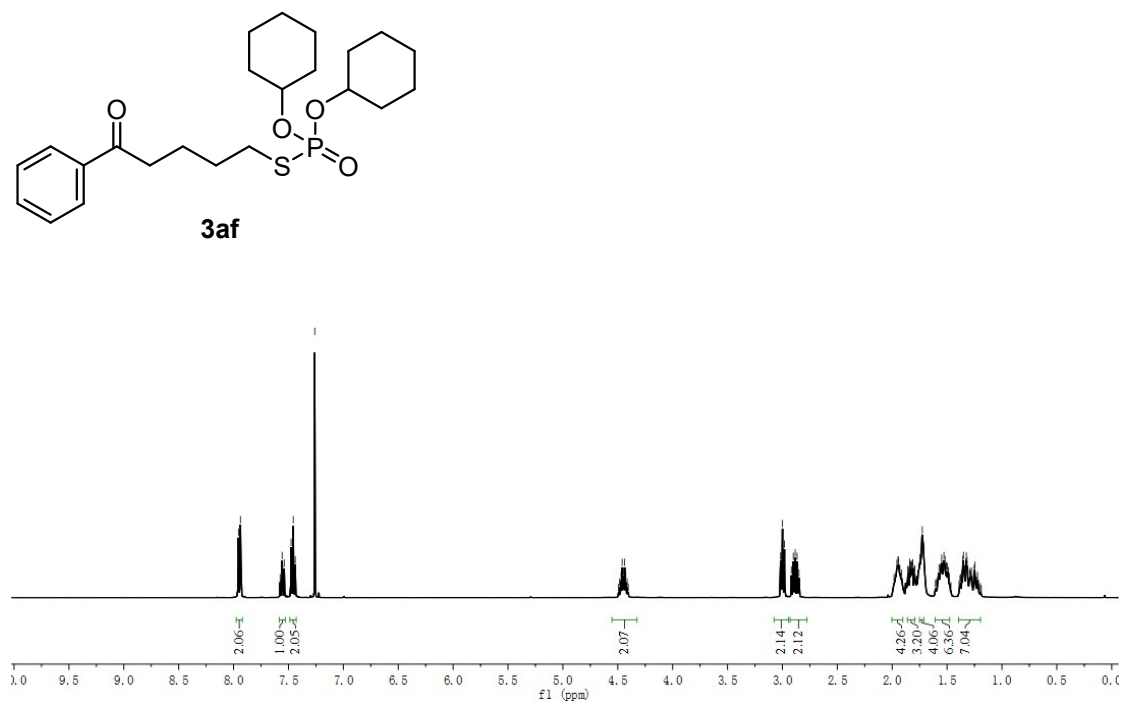

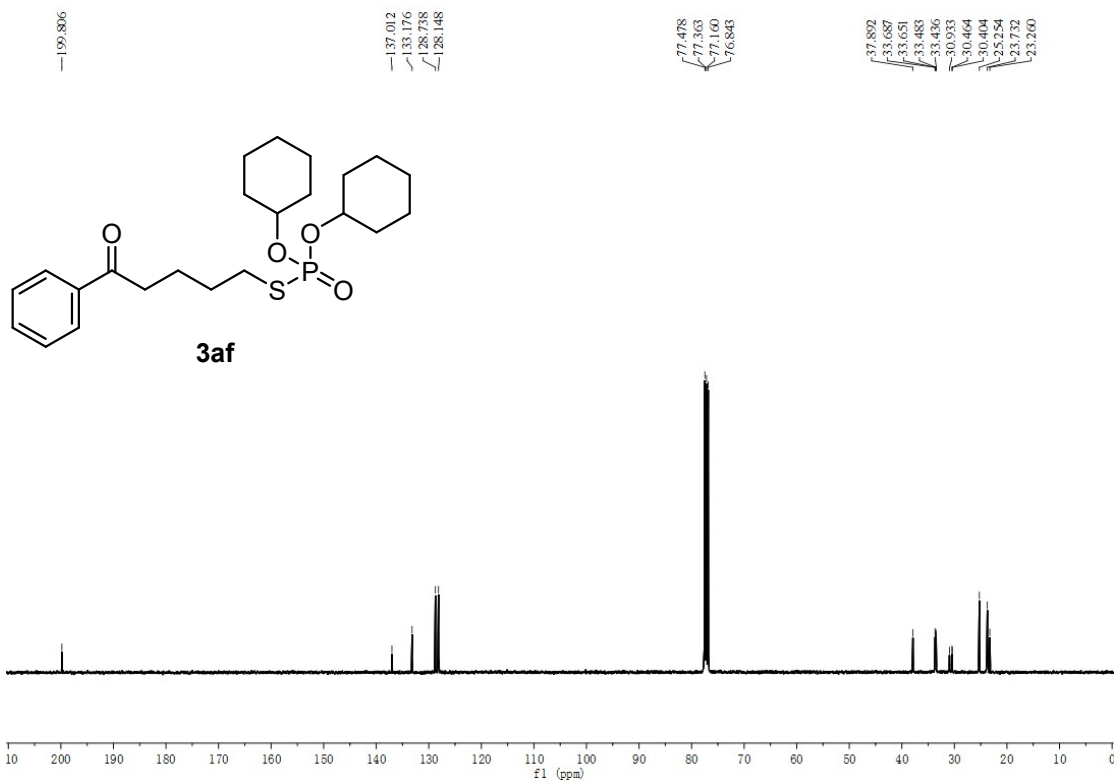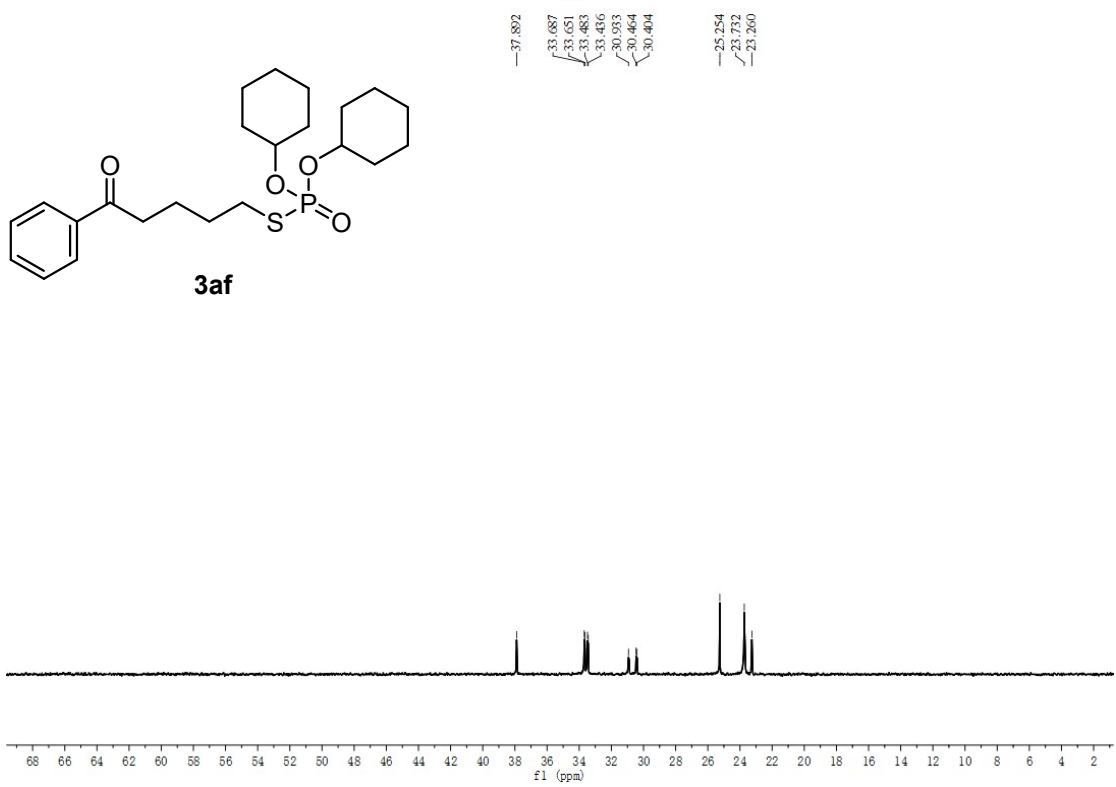

$^{31}\text{P}$  NMR (162 MHz,  $\text{CDCl}_3$ ),  $^1\text{H}$  NMR (400 MHz,  $\text{CDCl}_3$ ) and  $^{13}\text{C}$  NMR (100 MHz,  $\text{CDCl}_3$ ) spectra of product **3ag**

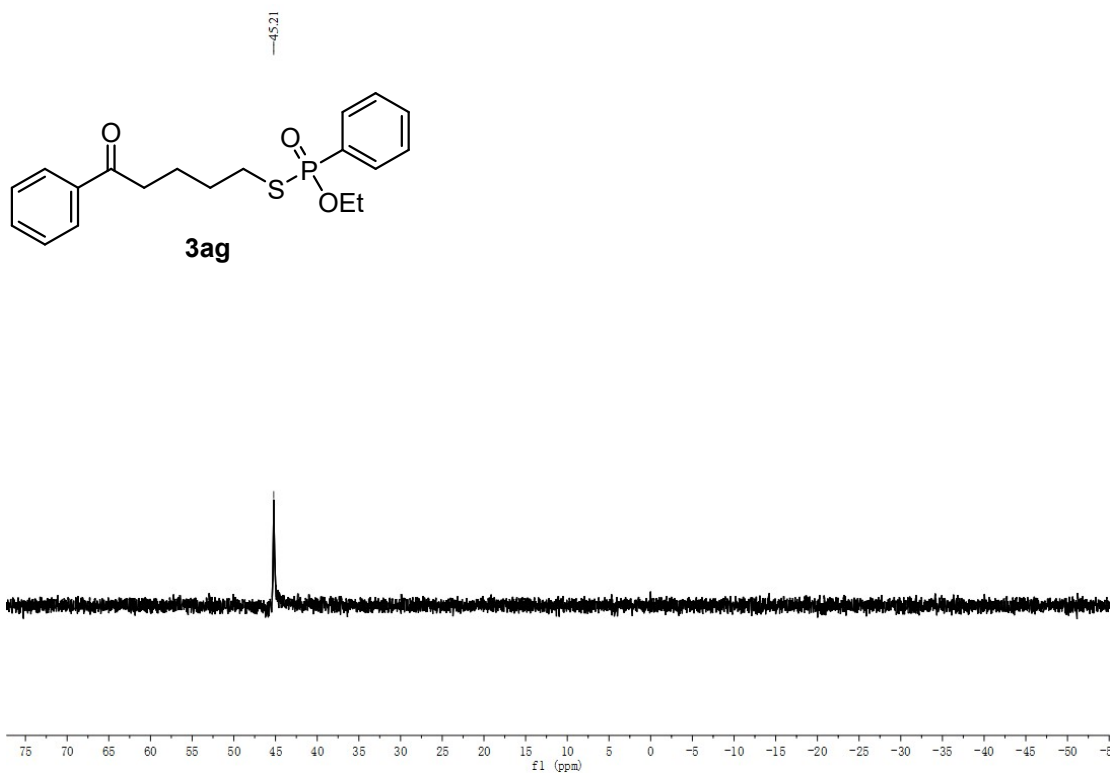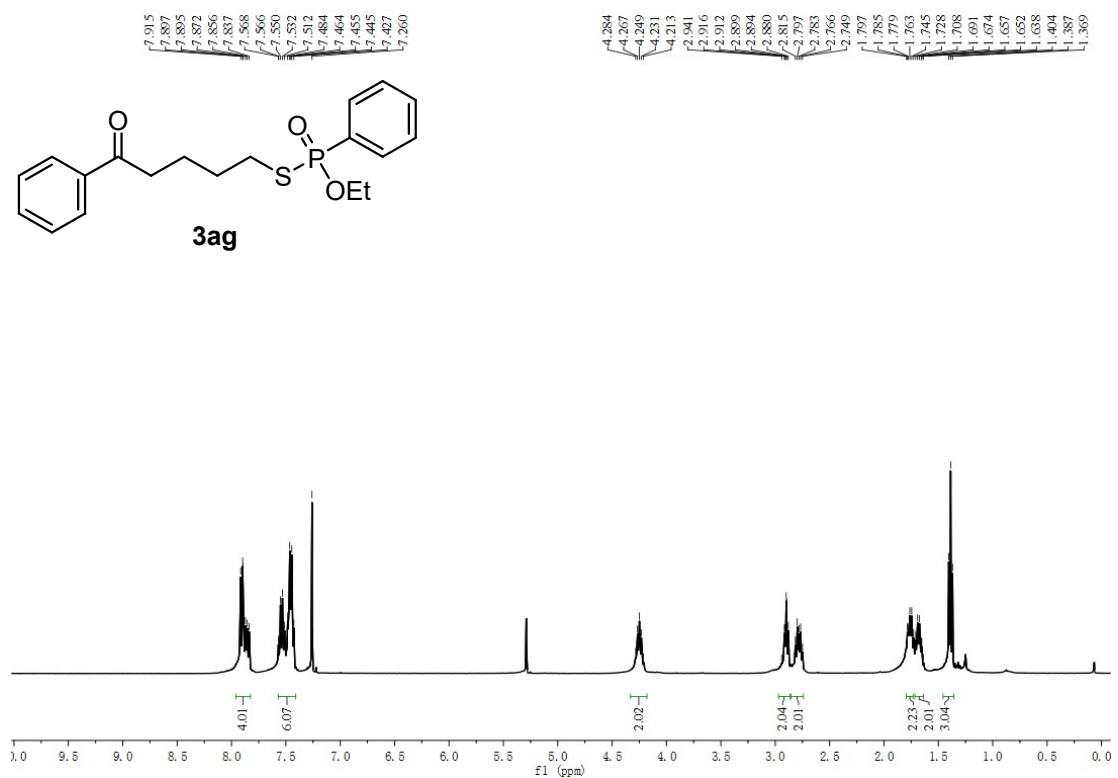

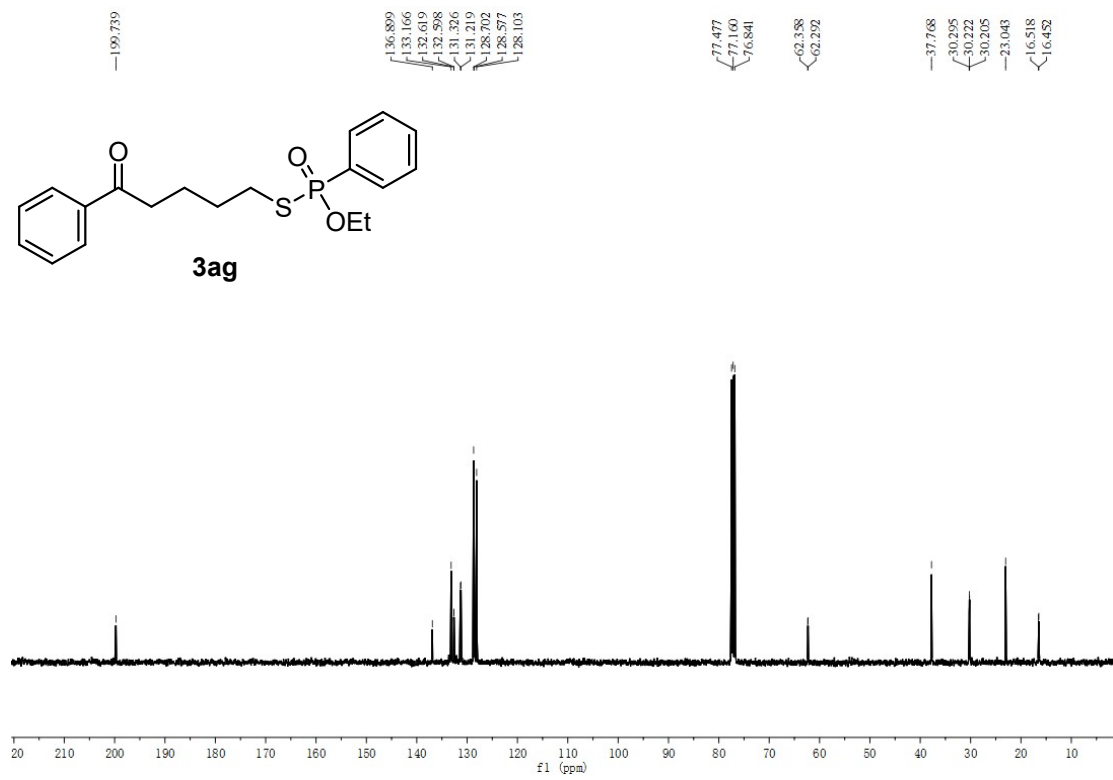

$^{31}\text{P}$  NMR (162 MHz,  $\text{CDCl}_3$ ),  $^1\text{H}$  NMR (400 MHz,  $\text{CDCl}_3$ ) and  $^{13}\text{C}$  NMR (100 MHz,  $\text{CDCl}_3$ ) spectra of product **3ah**

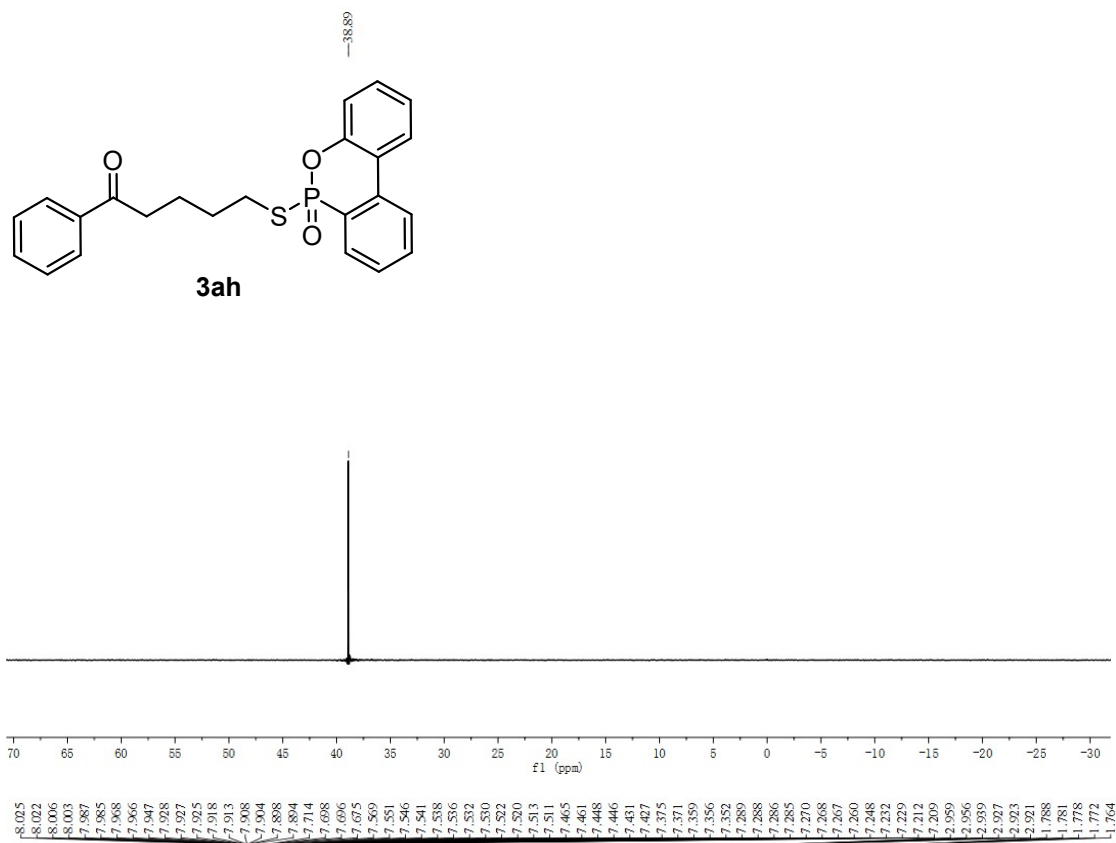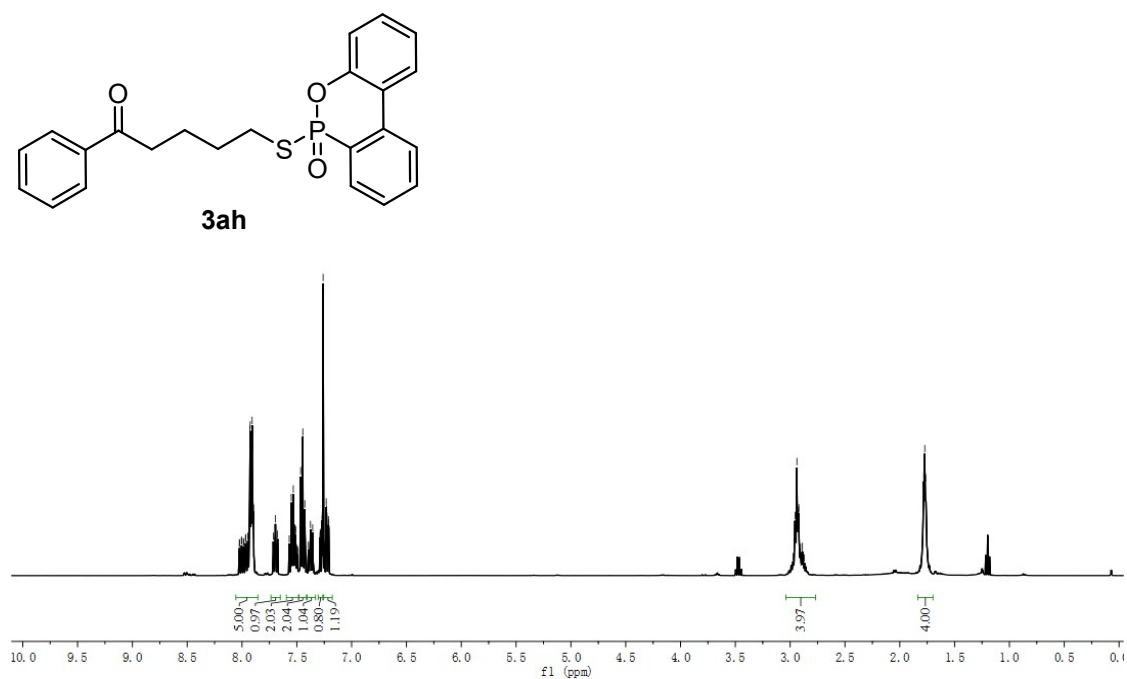

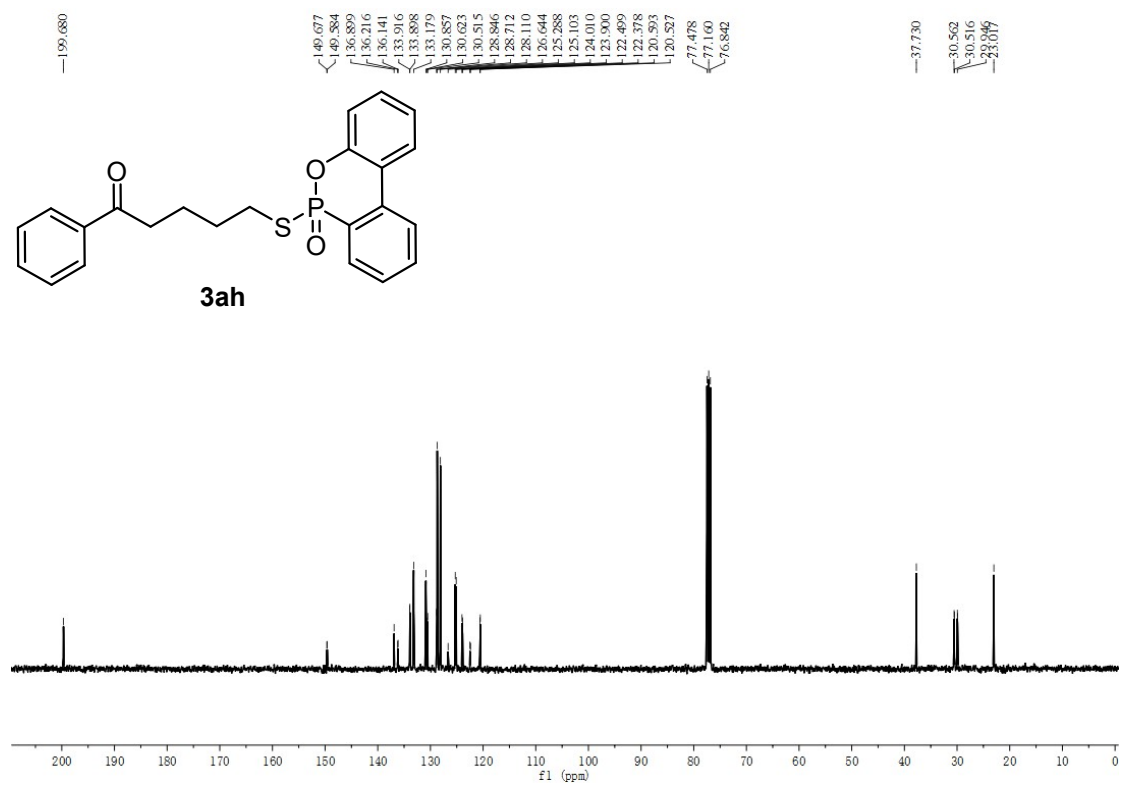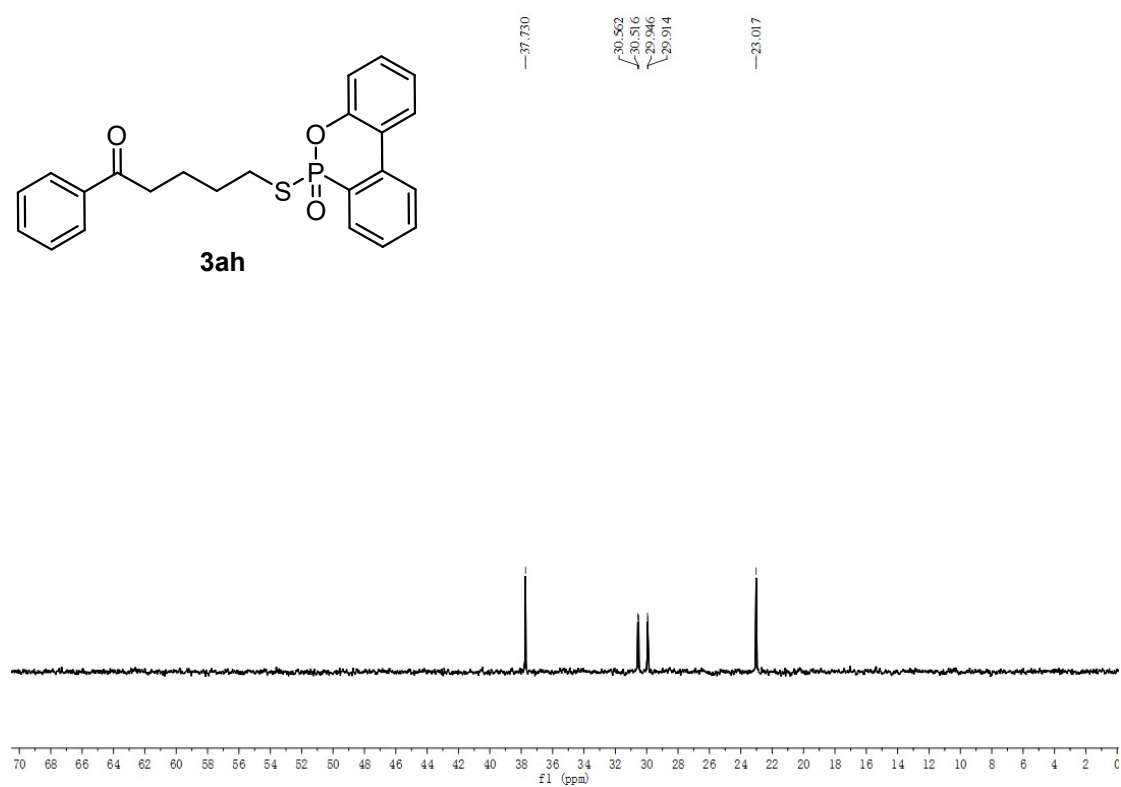

$^{31}\text{P}$  NMR (162 MHz,  $\text{CDCl}_3$ ),  $^1\text{H}$  NMR (400 MHz,  $\text{CDCl}_3$ ) and  $^{13}\text{C}$  NMR (100 MHz,  $\text{CDCl}_3$ ) spectra of product **3ai**

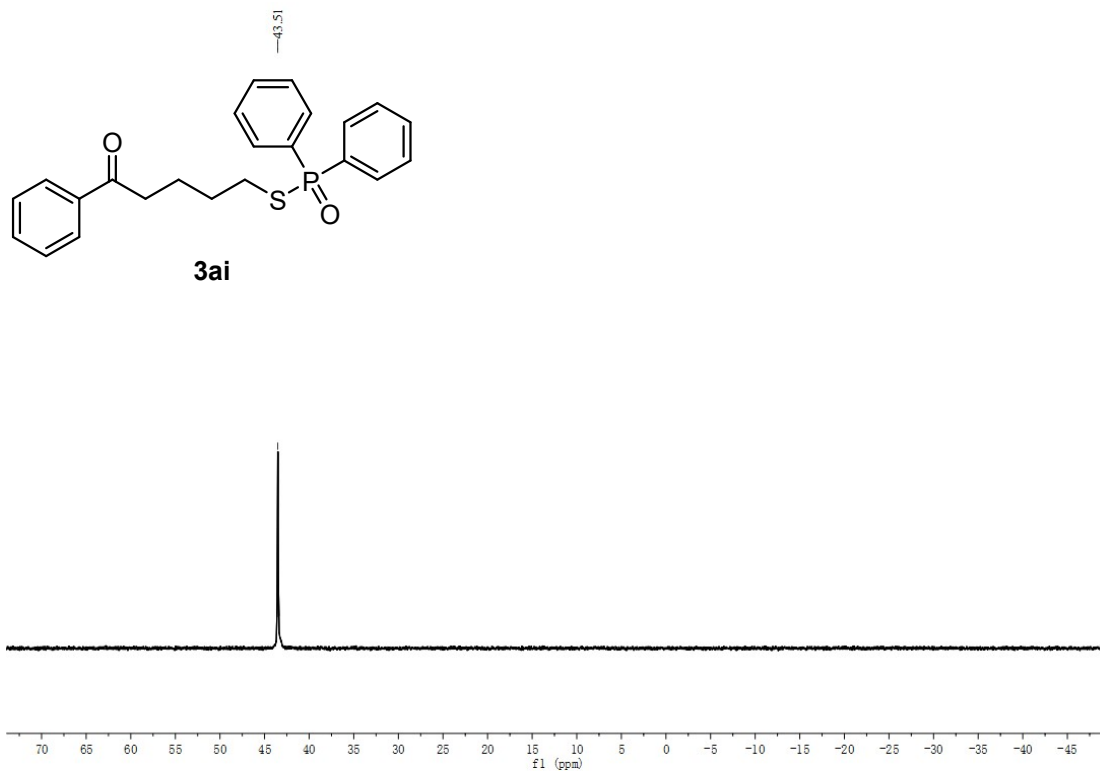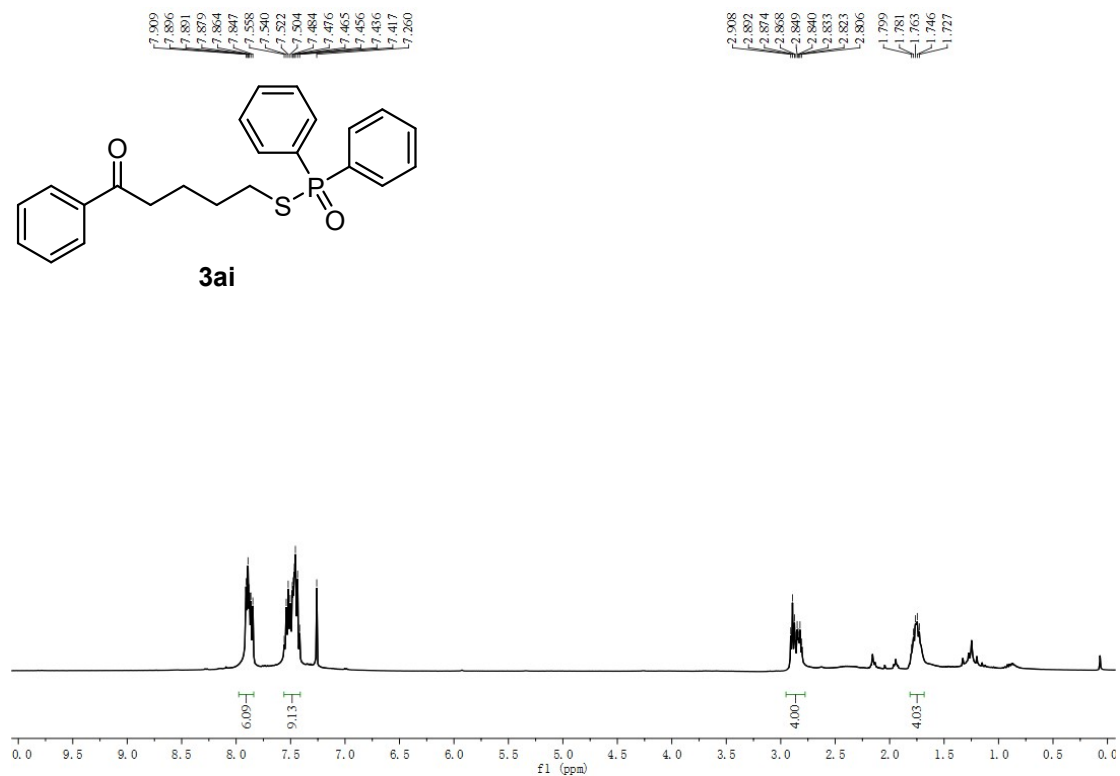

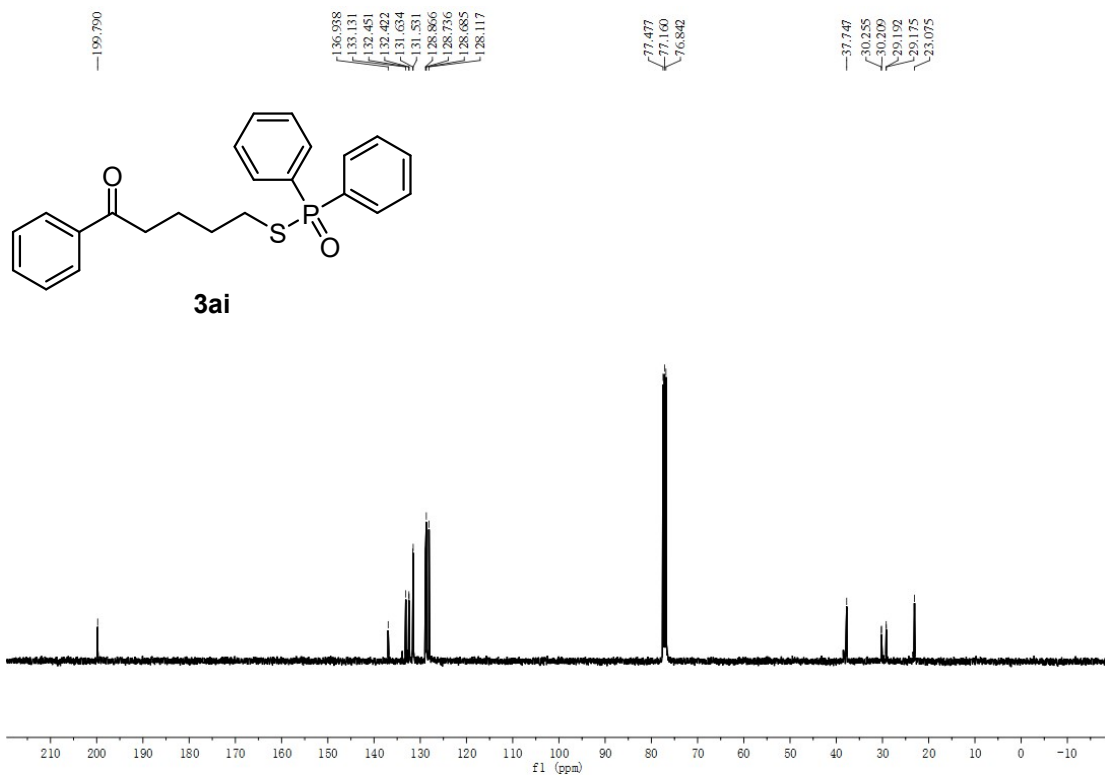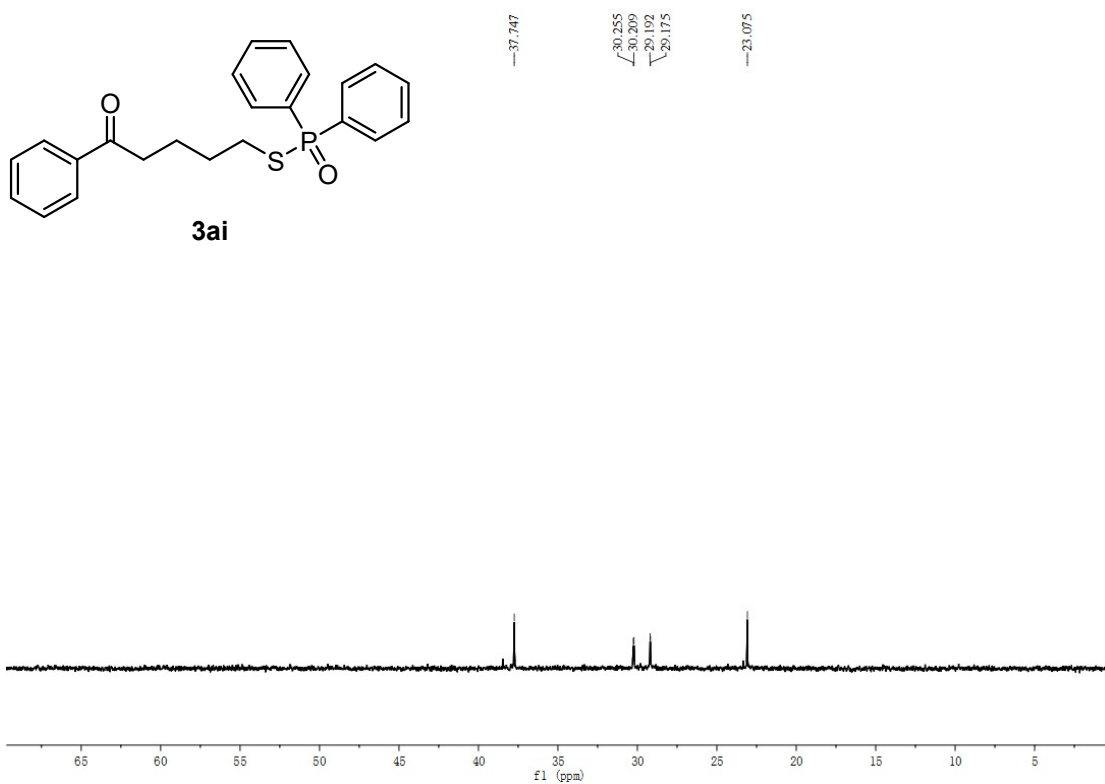



$^{31}\text{P}$  NMR (162 MHz,  $\text{CDCl}_3$ ),  $^1\text{H}$  NMR (400 MHz,  $\text{CDCl}_3$ ) and  $^{13}\text{C}$  NMR (100 MHz,  $\text{CDCl}_3$ ) spectra of product **3aj**

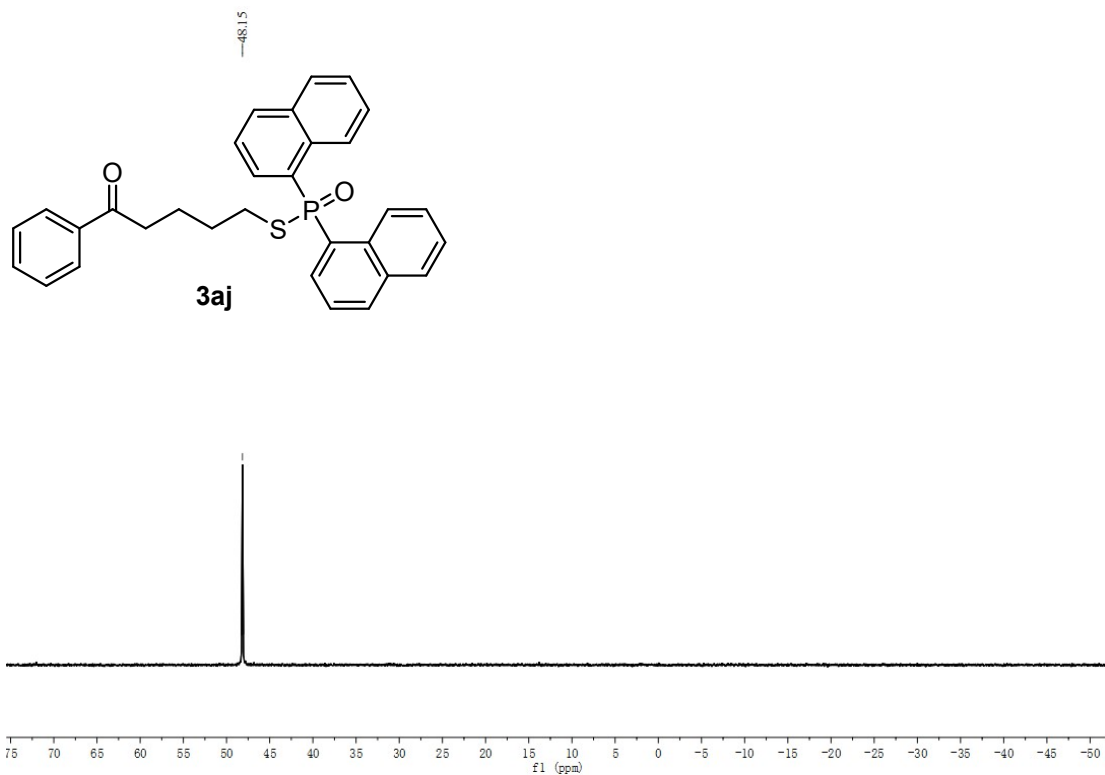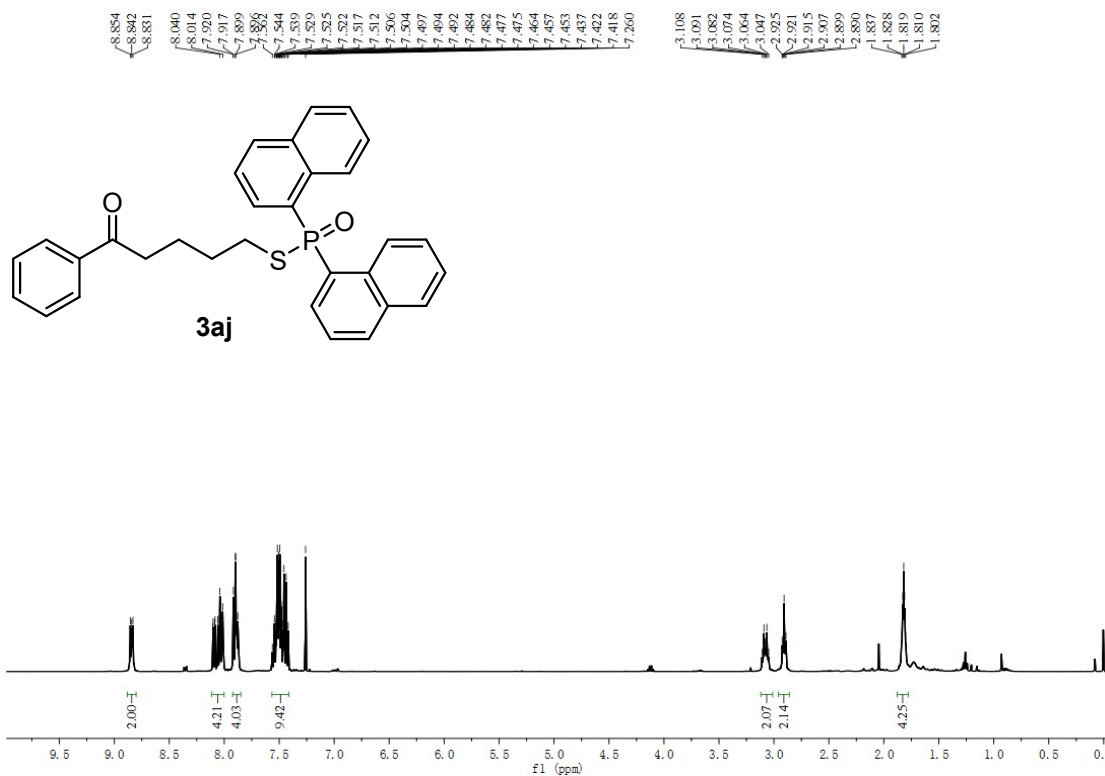

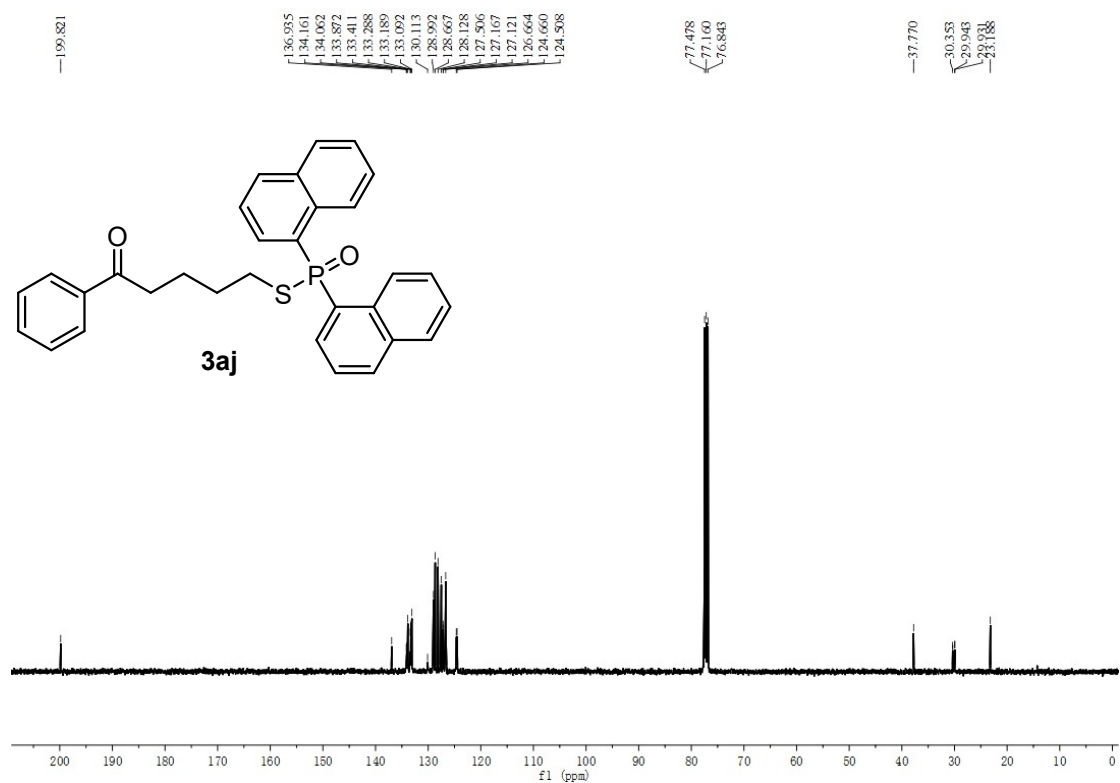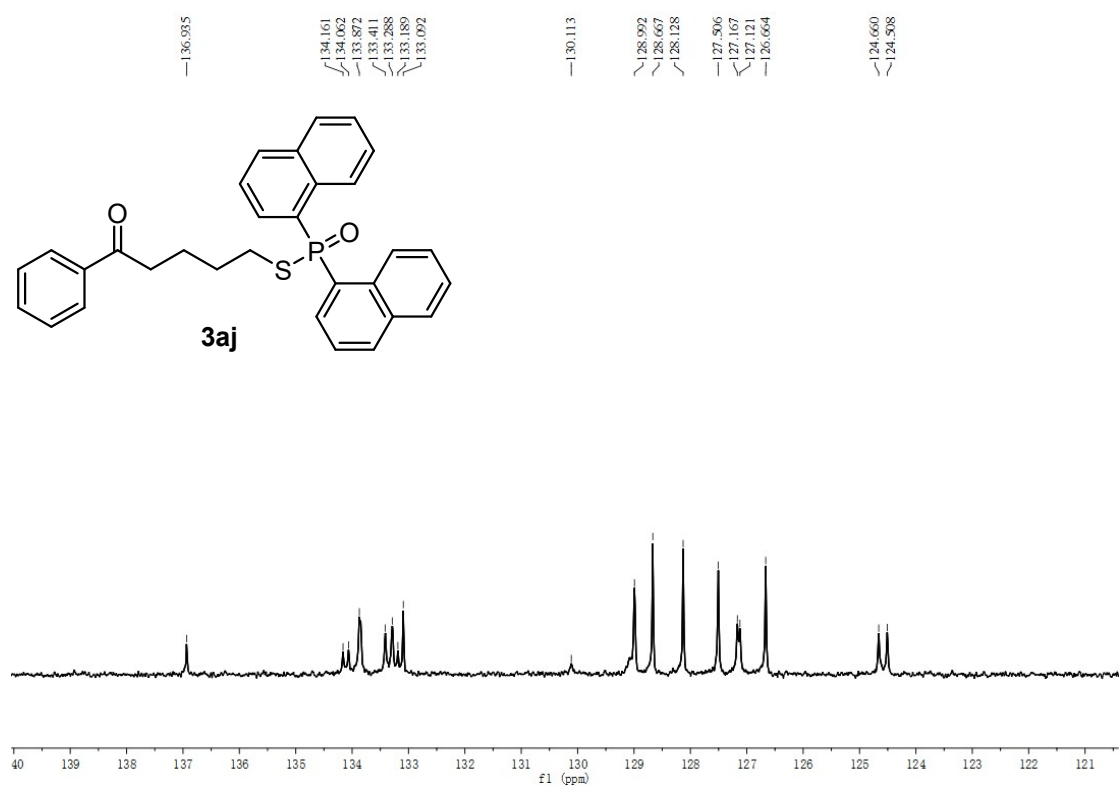

$^{31}\text{P}$  NMR (162 MHz,  $\text{CDCl}_3$ ),  $^1\text{H}$  NMR (400 MHz,  $\text{CDCl}_3$ ) and  $^{13}\text{C}$  NMR (100 MHz,  $\text{CDCl}_3$ ) spectra of product **5aa**

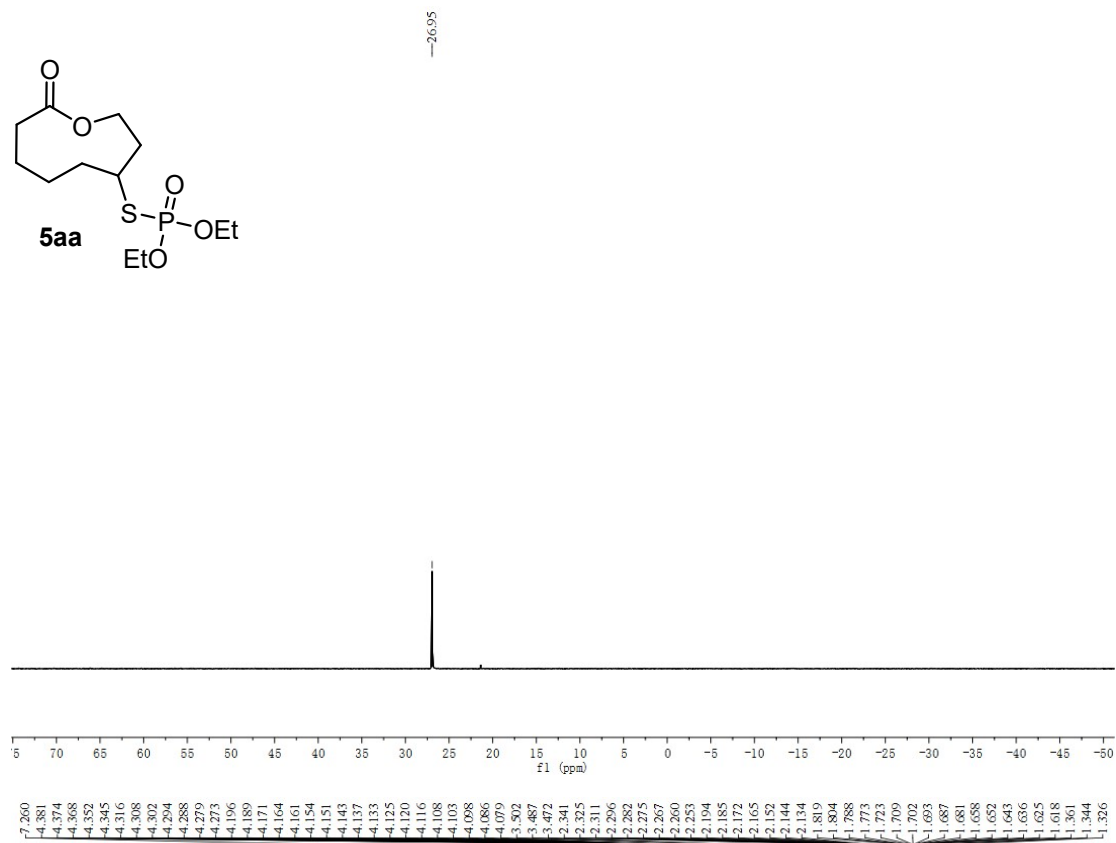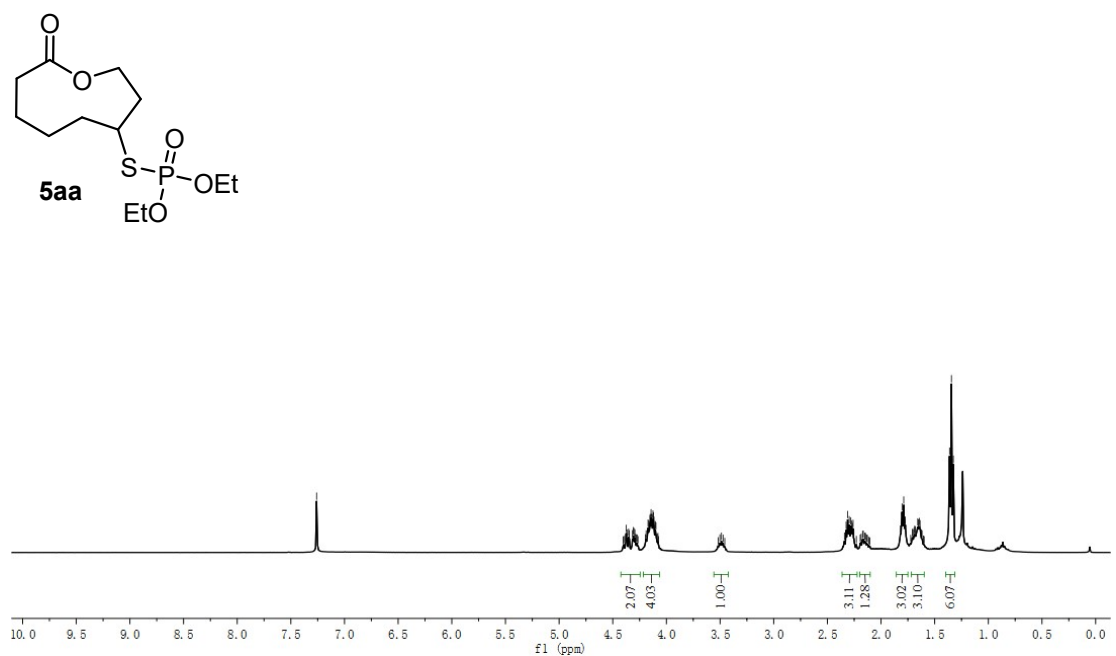

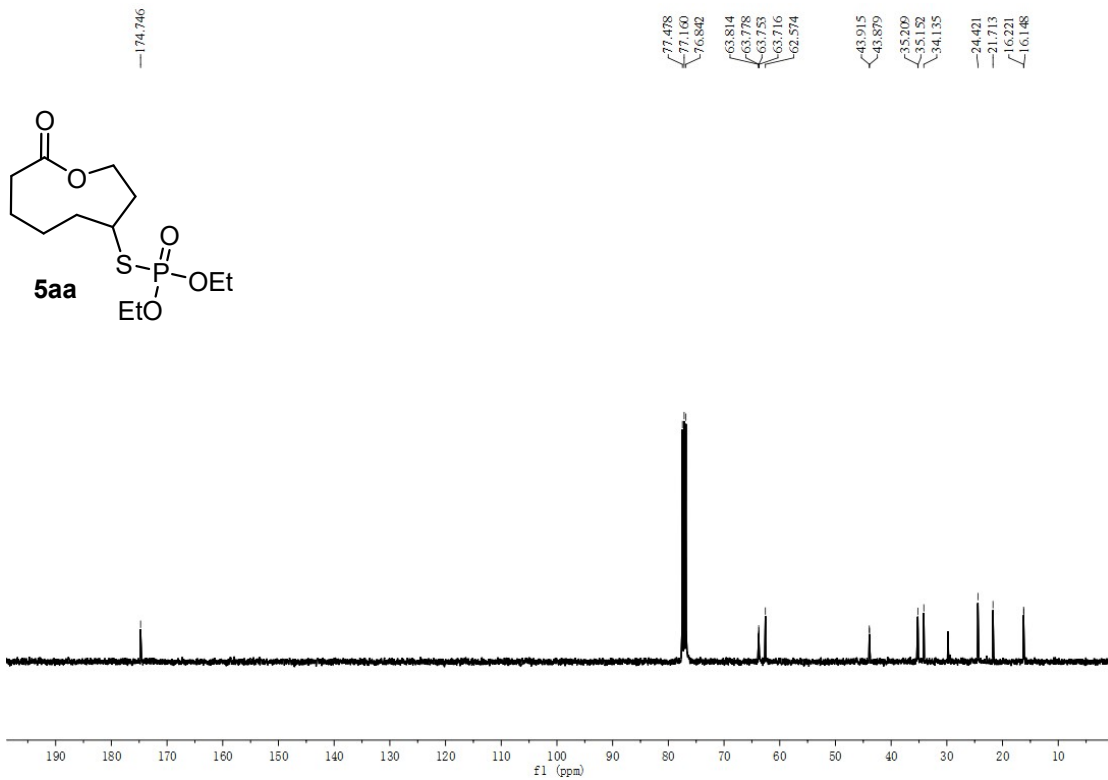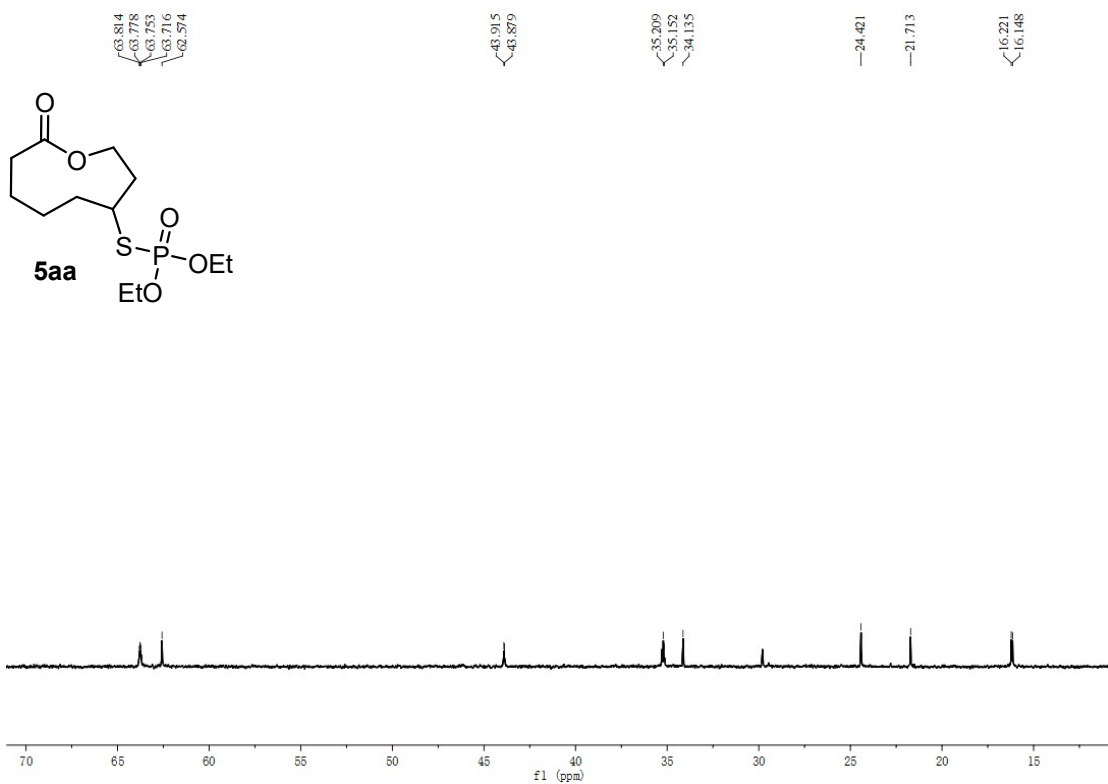

$^{31}\text{P}$  NMR (162 MHz,  $\text{CDCl}_3$ ),  $^1\text{H}$  NMR (400 MHz,  $\text{CDCl}_3$ ) and  $^{13}\text{C}$  NMR (100 MHz,  $\text{CDCl}_3$ ) spectra of product **5ba**

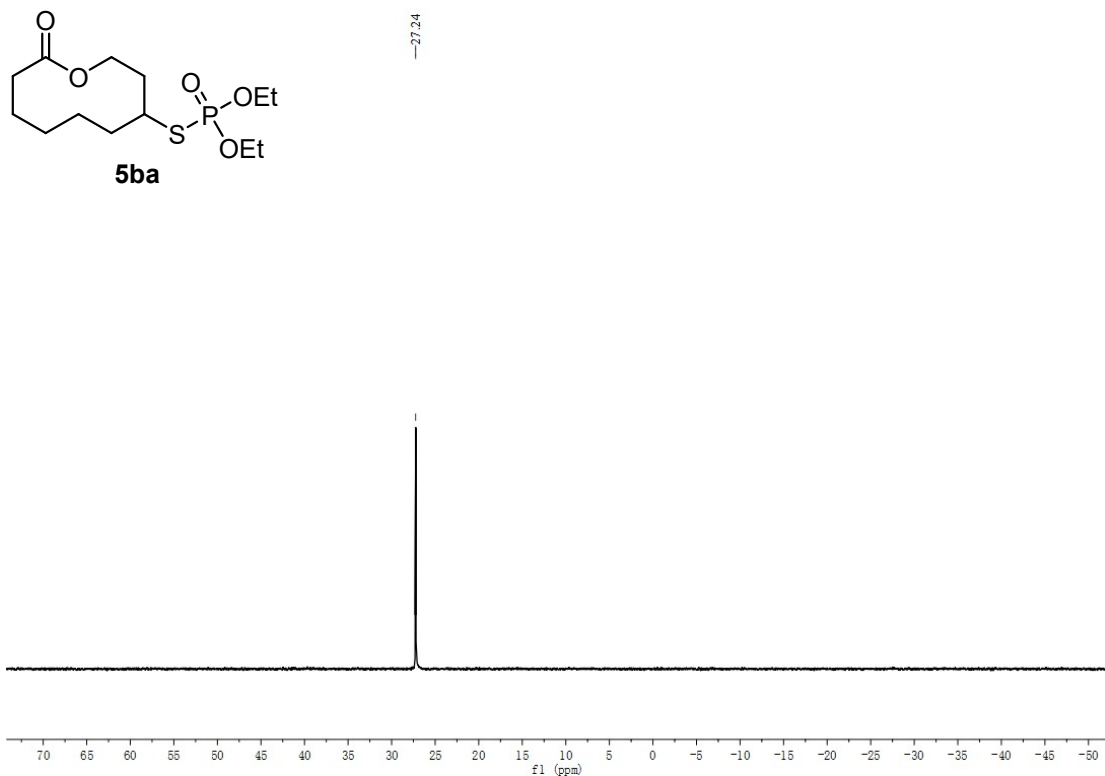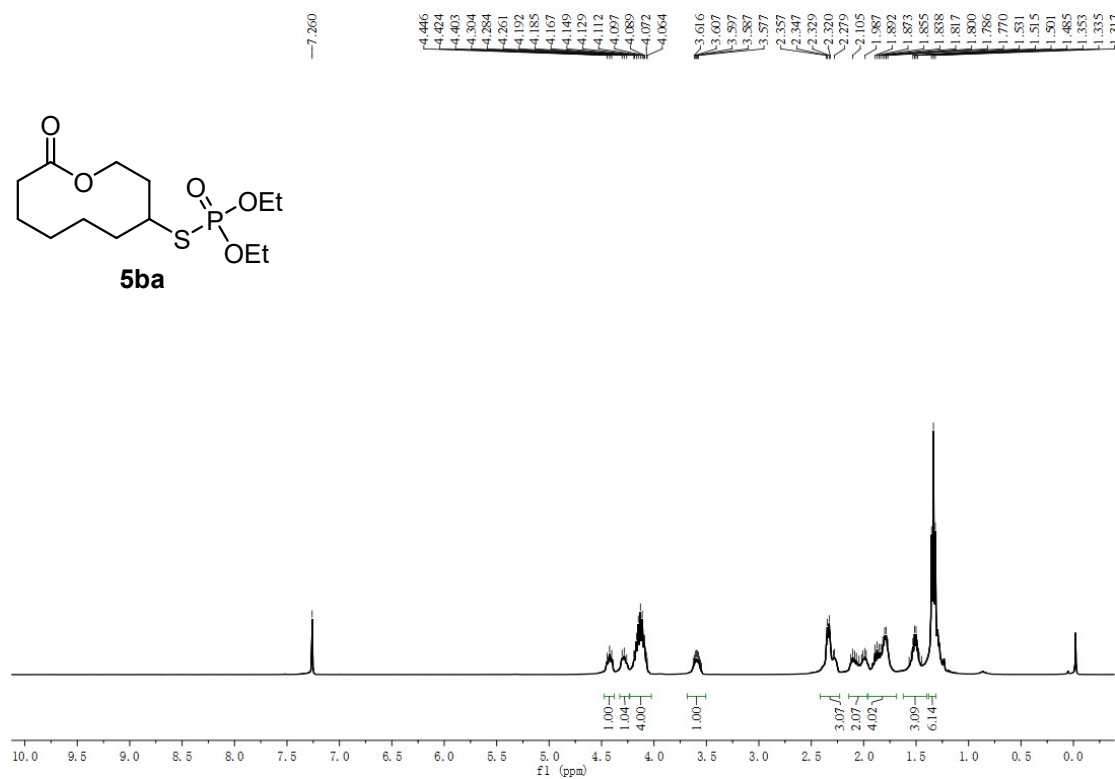

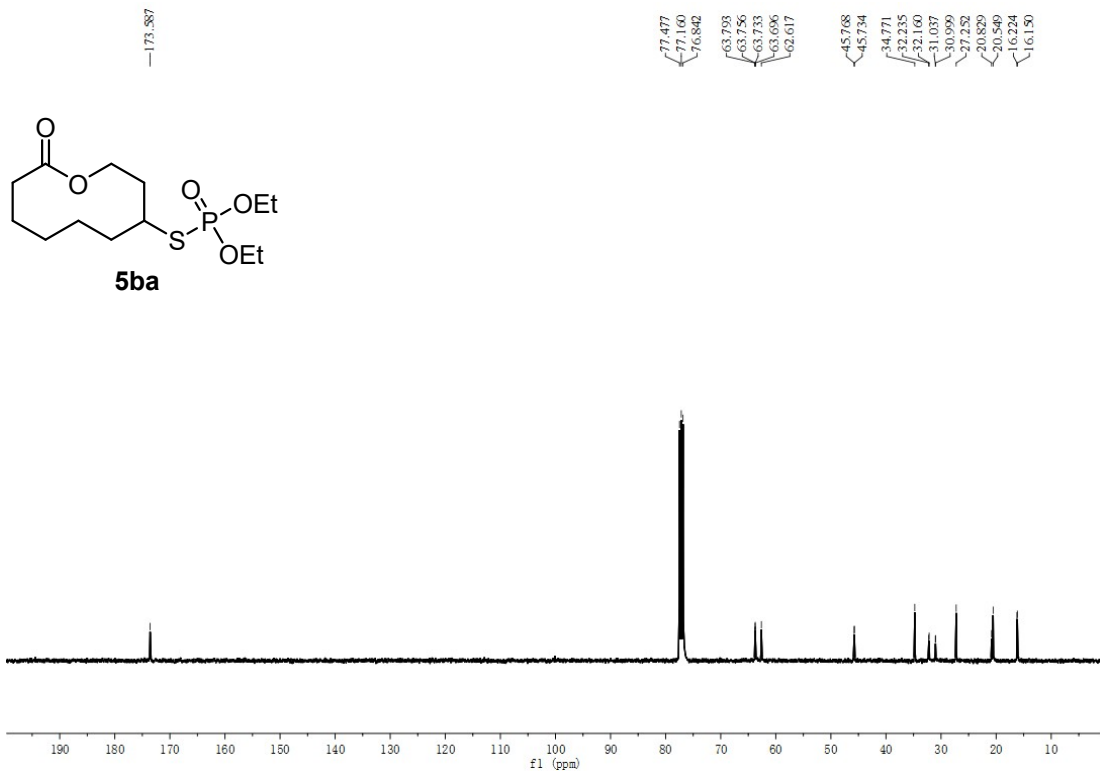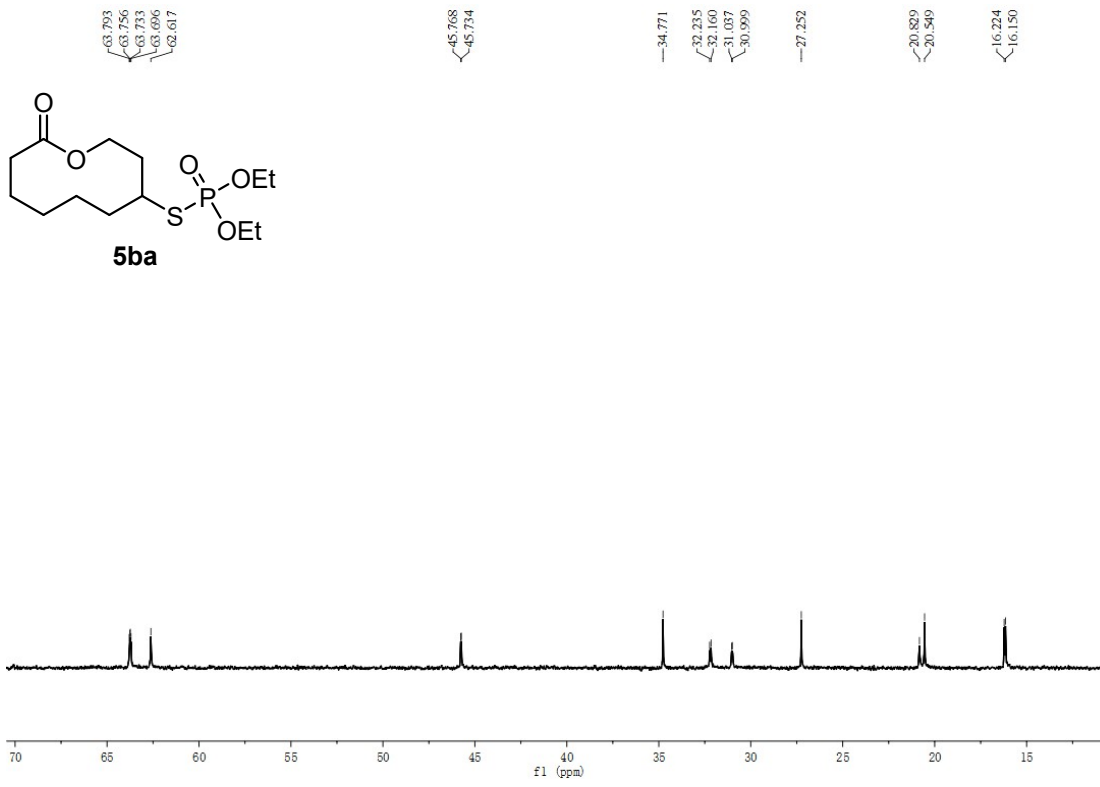

$^{31}\text{P}$  NMR (162 MHz,  $\text{CDCl}_3$ ),  $^1\text{H}$  NMR (400 MHz,  $\text{CDCl}_3$ ) and  $^{13}\text{C}$  NMR (100 MHz,  $\text{CDCl}_3$ ) spectra of product **5ca**

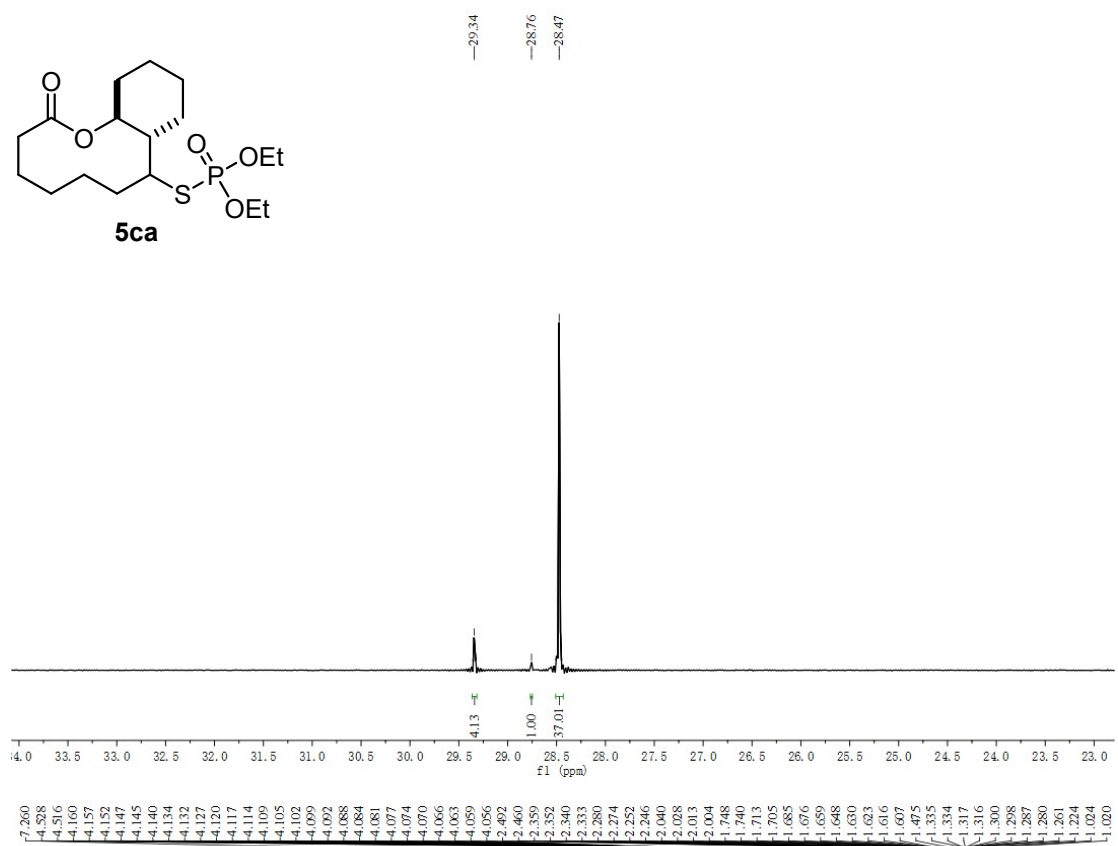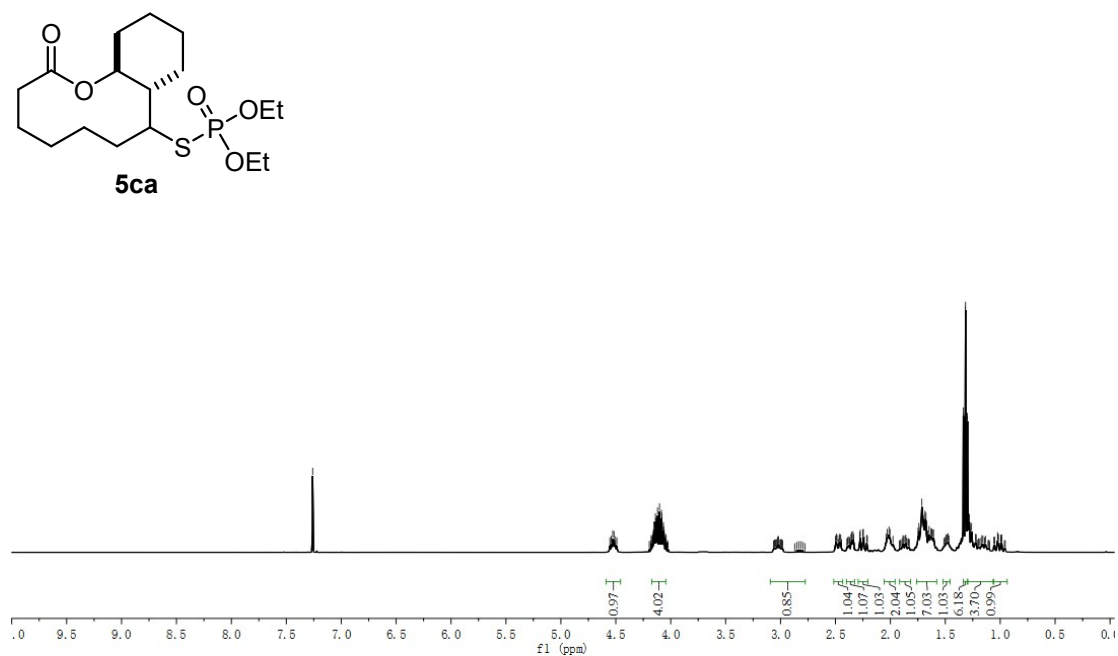

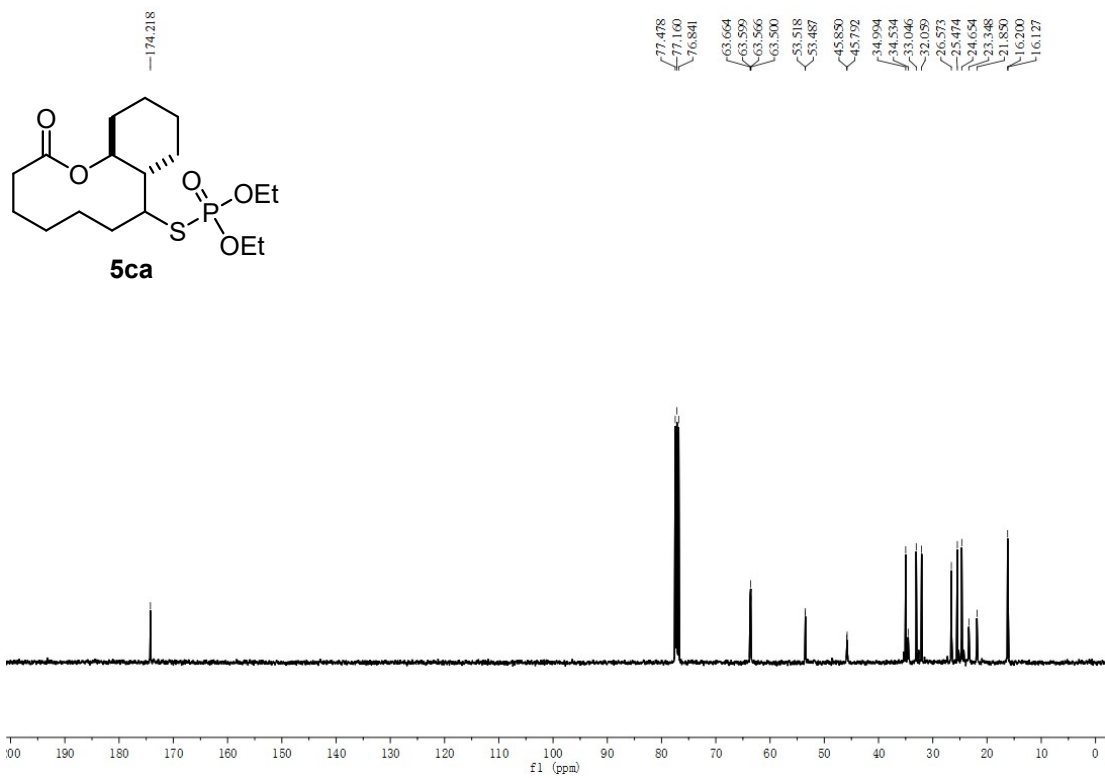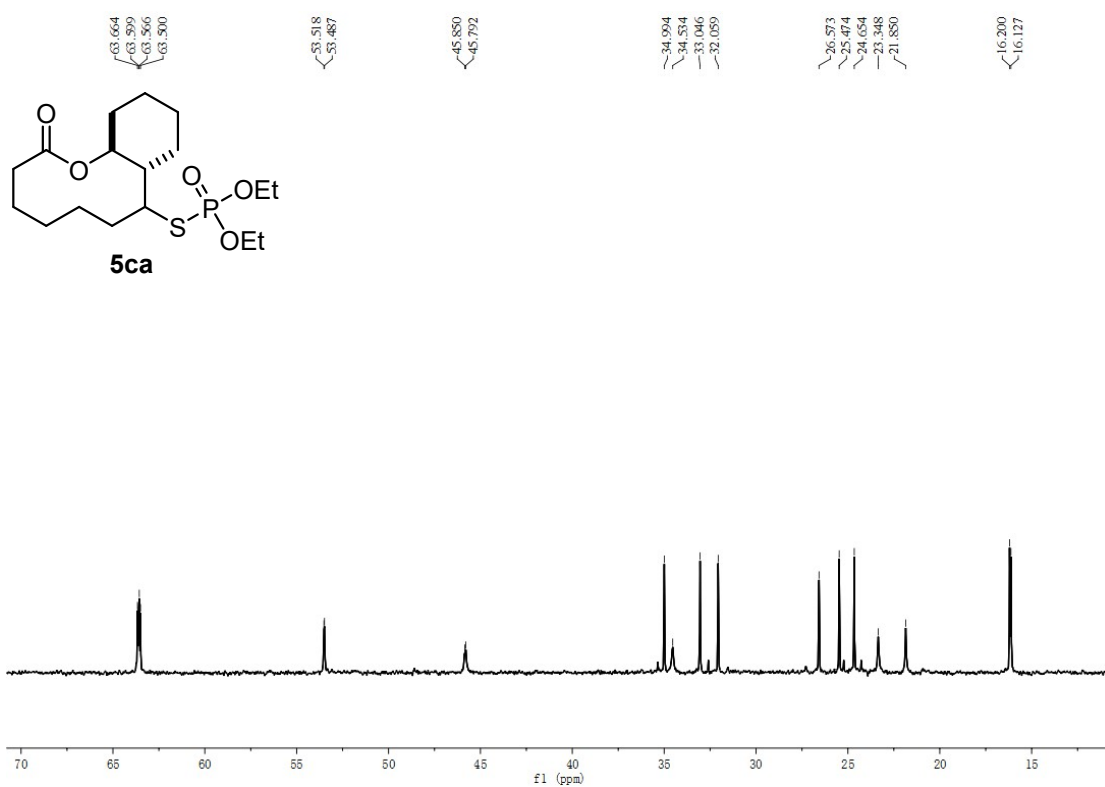



$^{31}\text{P}$  NMR (162 MHz,  $\text{CDCl}_3$ ),  $^1\text{H}$  NMR (400 MHz,  $\text{CDCl}_3$ ) and  $^{13}\text{C}$  NMR (100 MHz,  $\text{CDCl}_3$ ) spectra of product **5da**

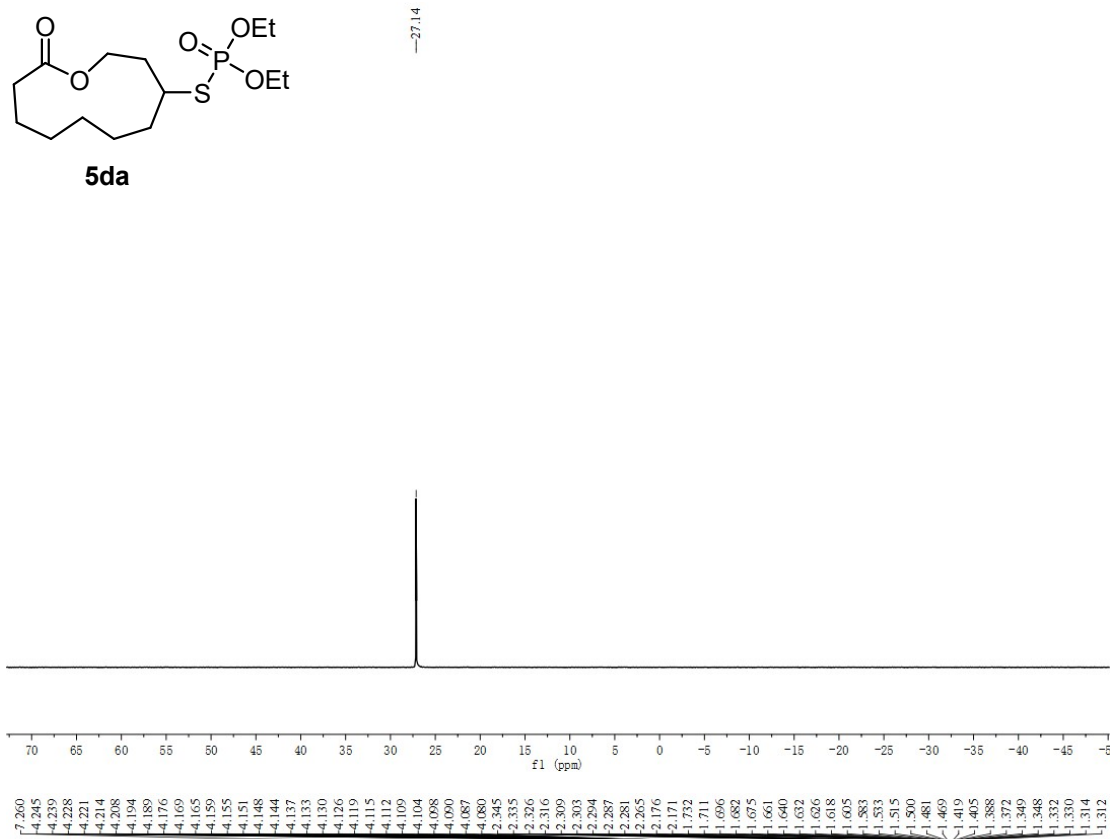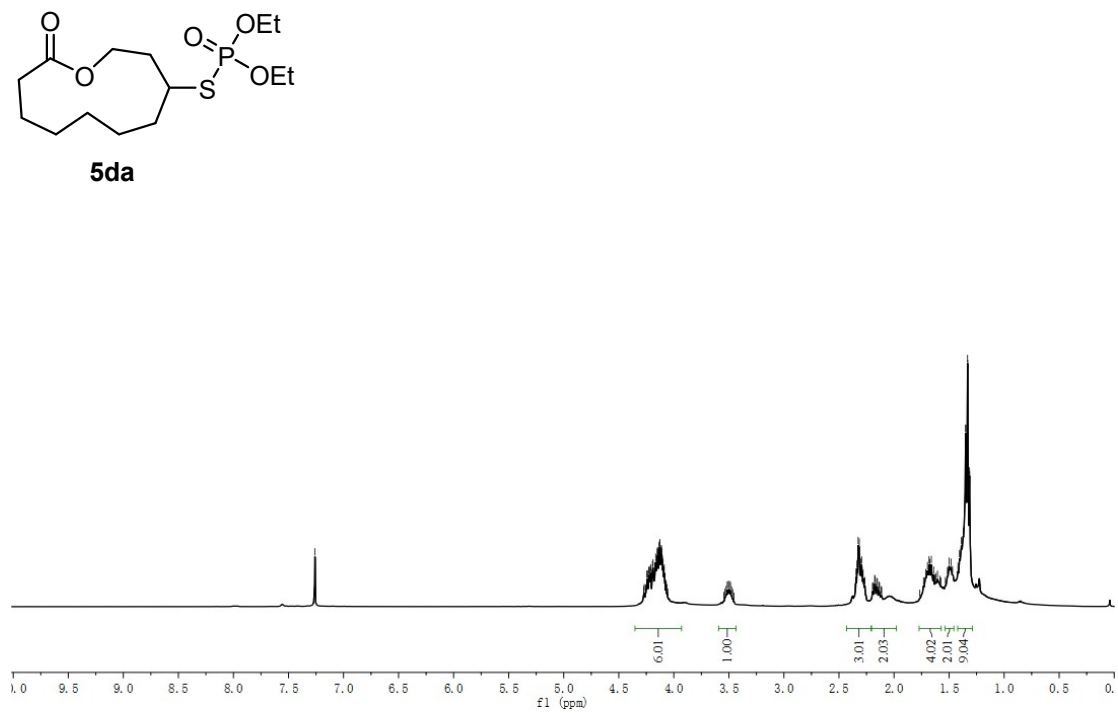

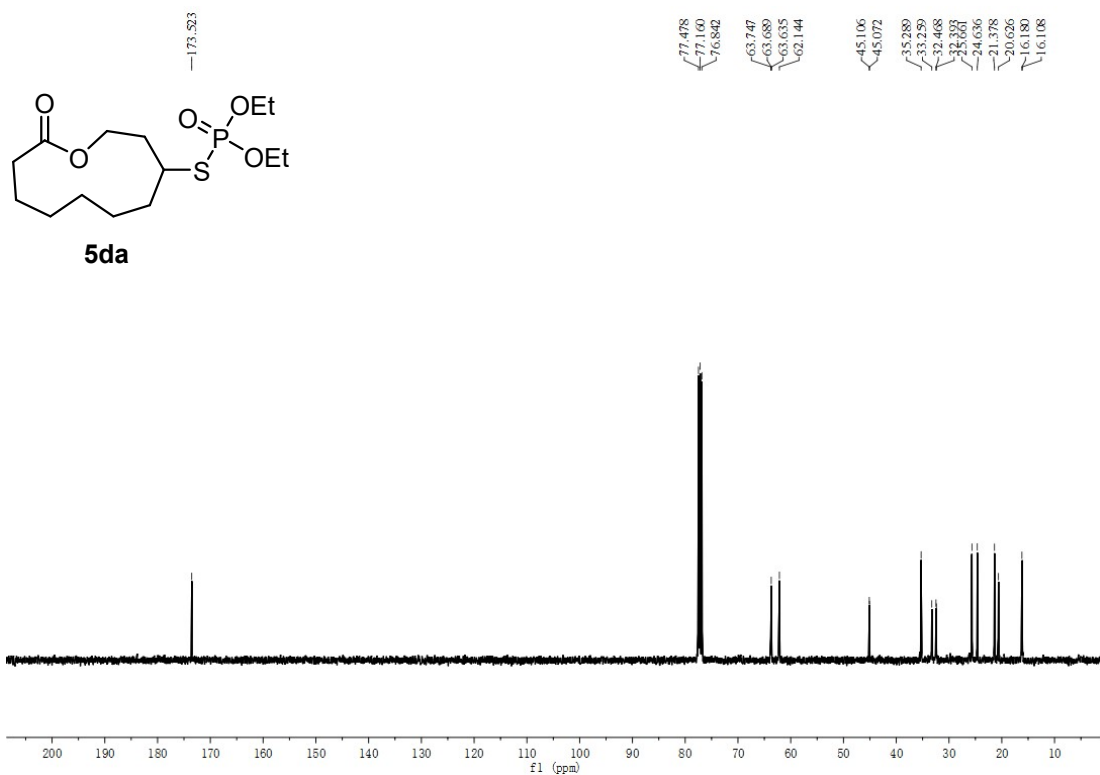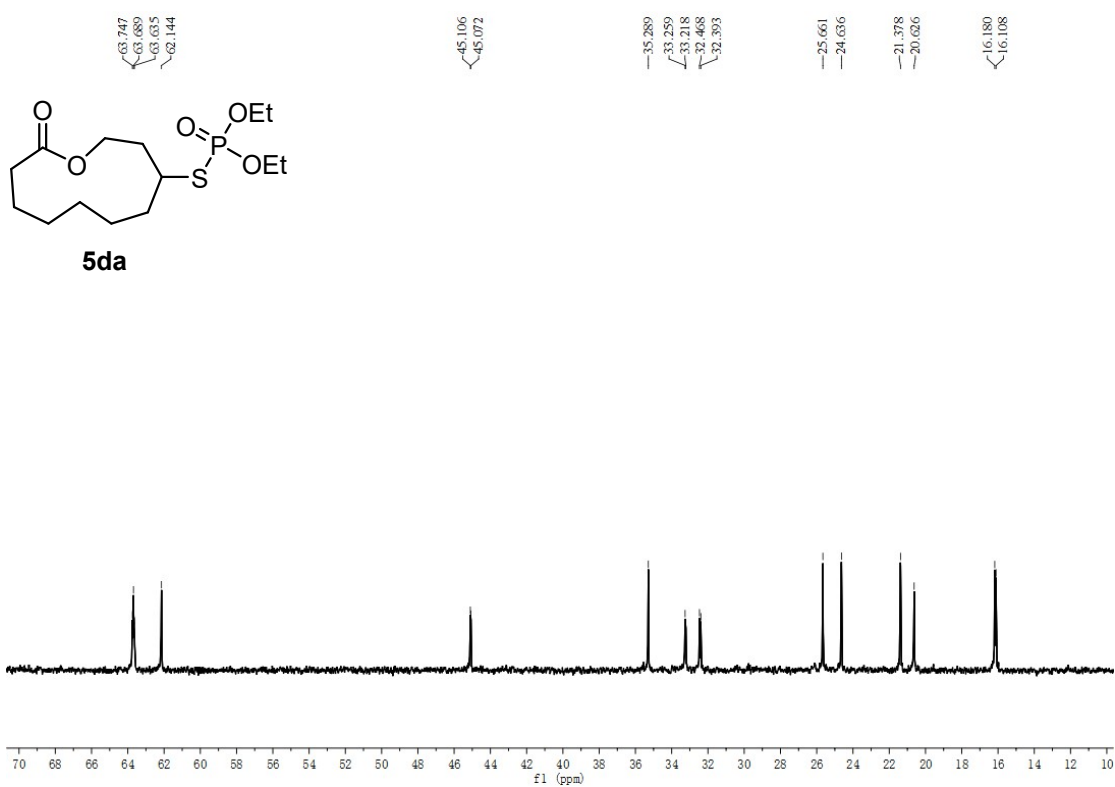

$^{31}\text{P}$  NMR (162 MHz,  $\text{CDCl}_3$ ),  $^1\text{H}$  NMR (400 MHz,  $\text{CDCl}_3$ ) and  $^{13}\text{C}$  NMR (100 MHz,  $\text{CDCl}_3$ ) spectra of product **5ea**

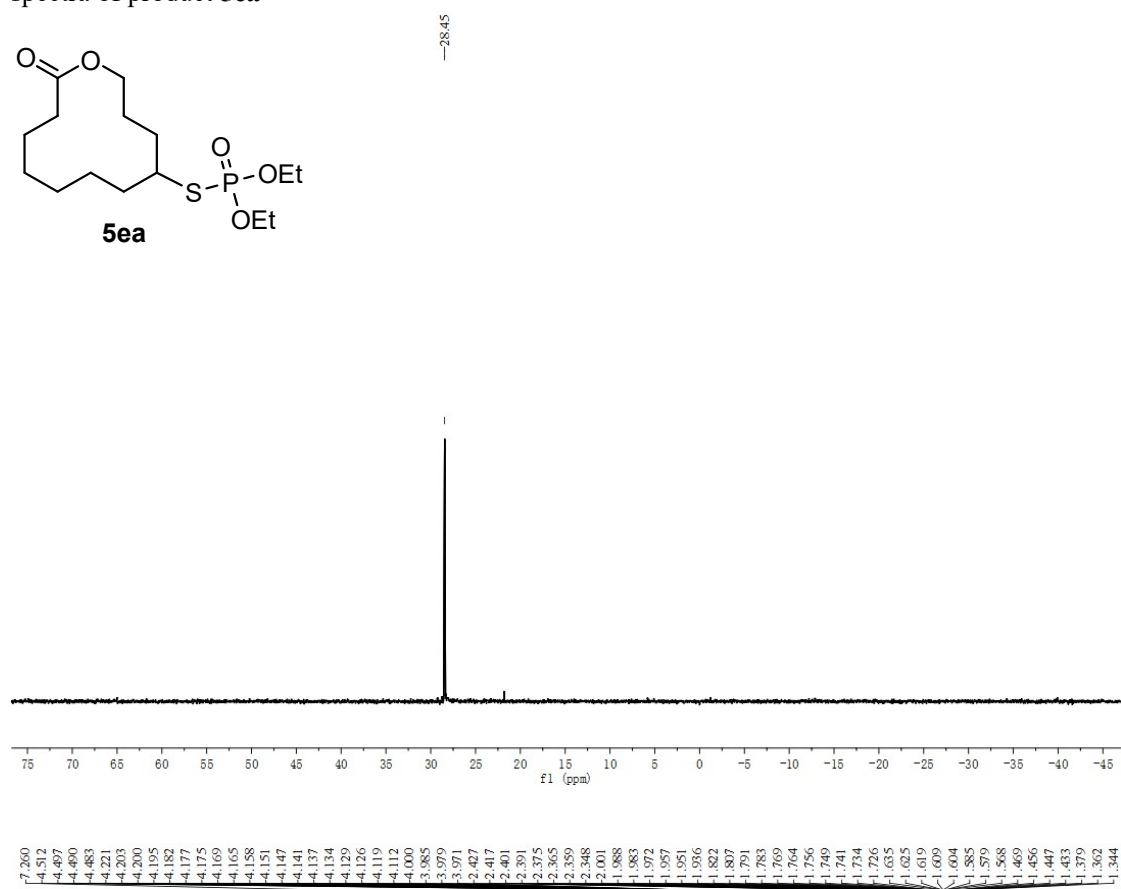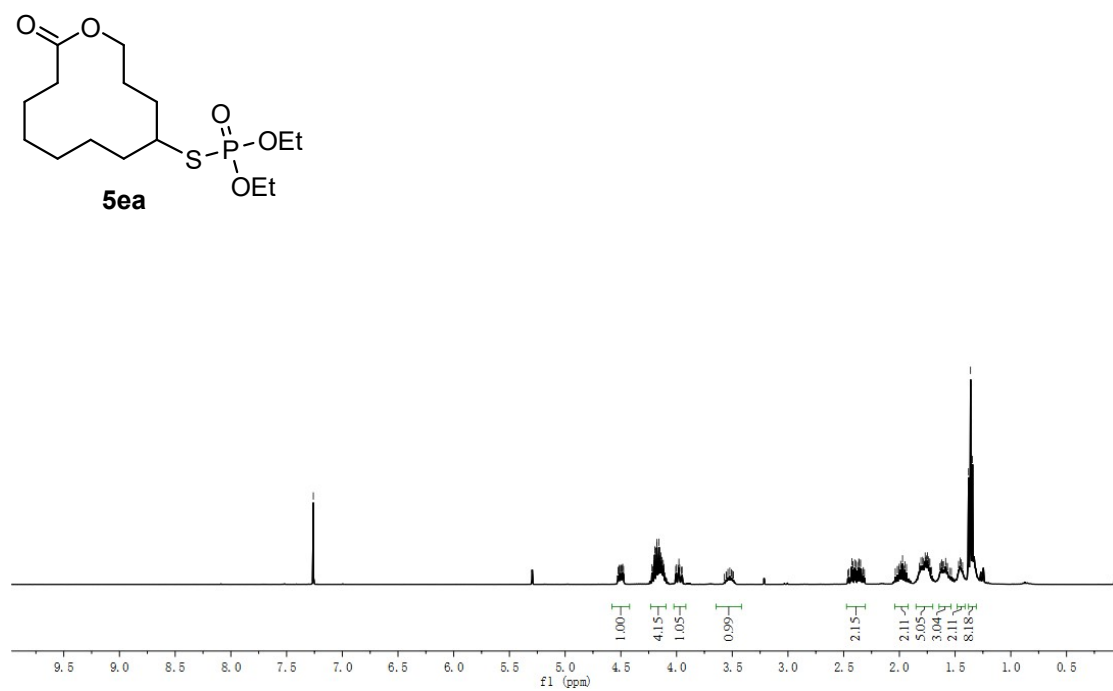

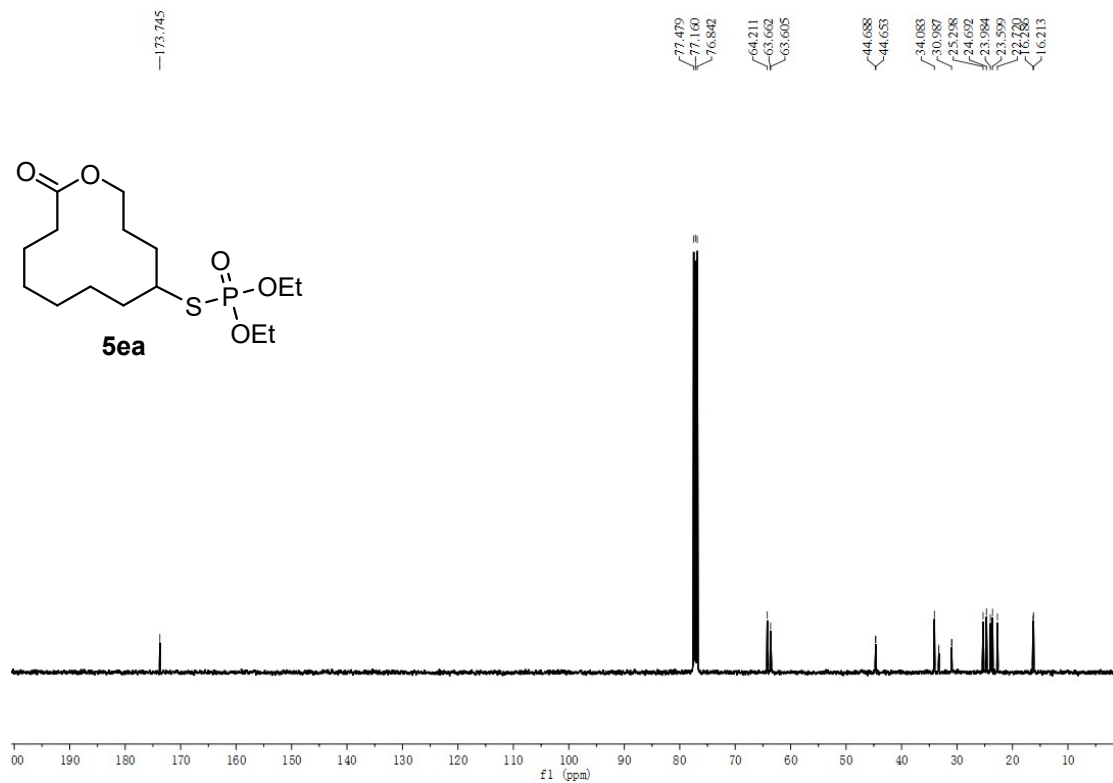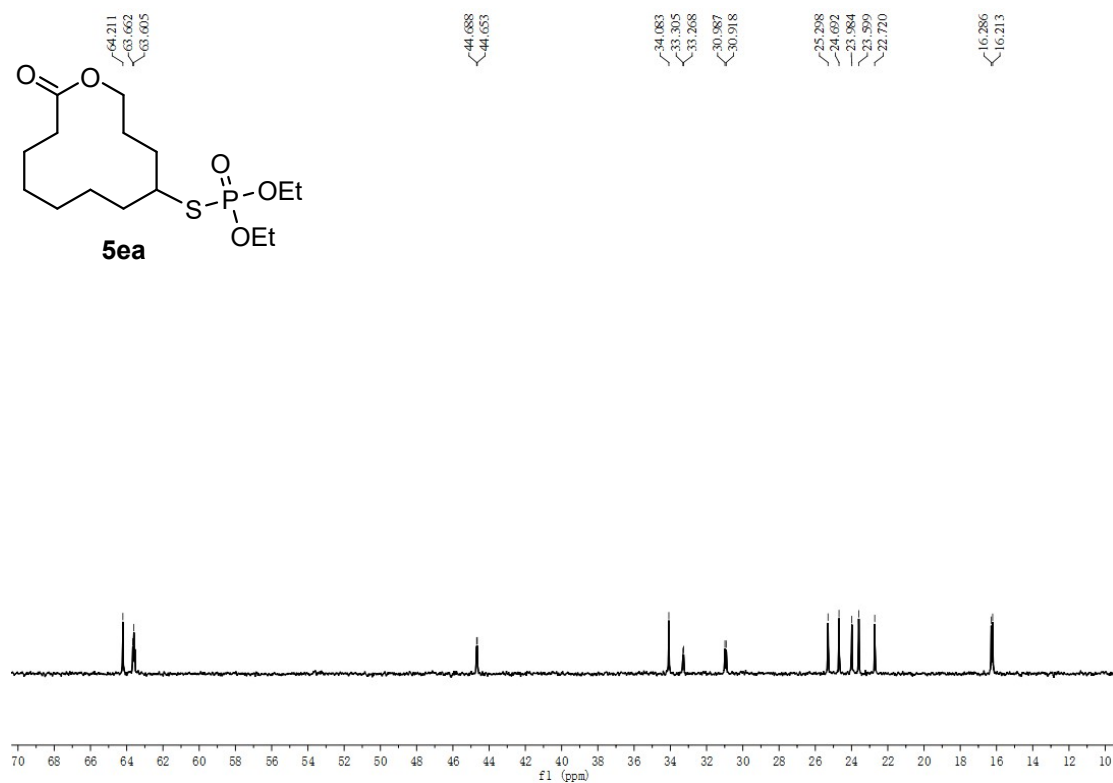

$^{31}\text{P}$  NMR (162 MHz,  $\text{CDCl}_3$ ),  $^1\text{H}$  NMR (400 MHz,  $\text{CDCl}_3$ ) and  $^{13}\text{C}$  NMR (100 MHz,  $\text{CDCl}_3$ ) spectra of product **5fa**

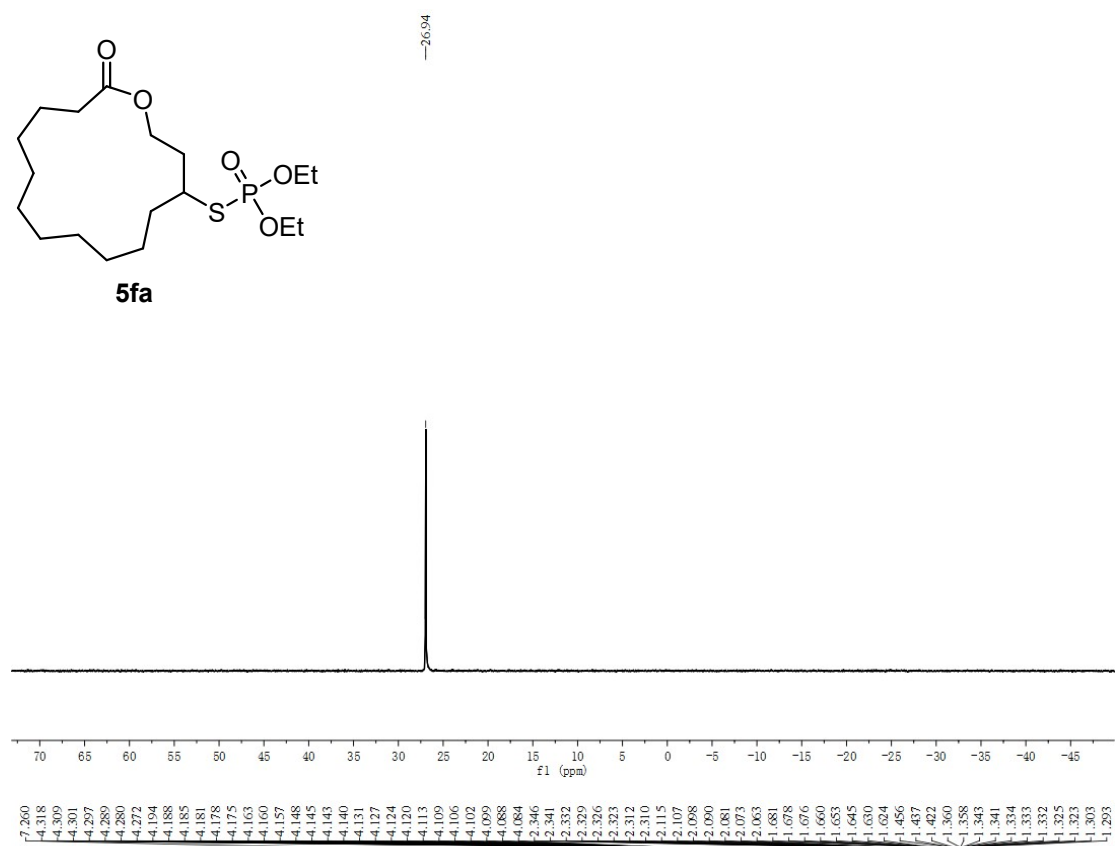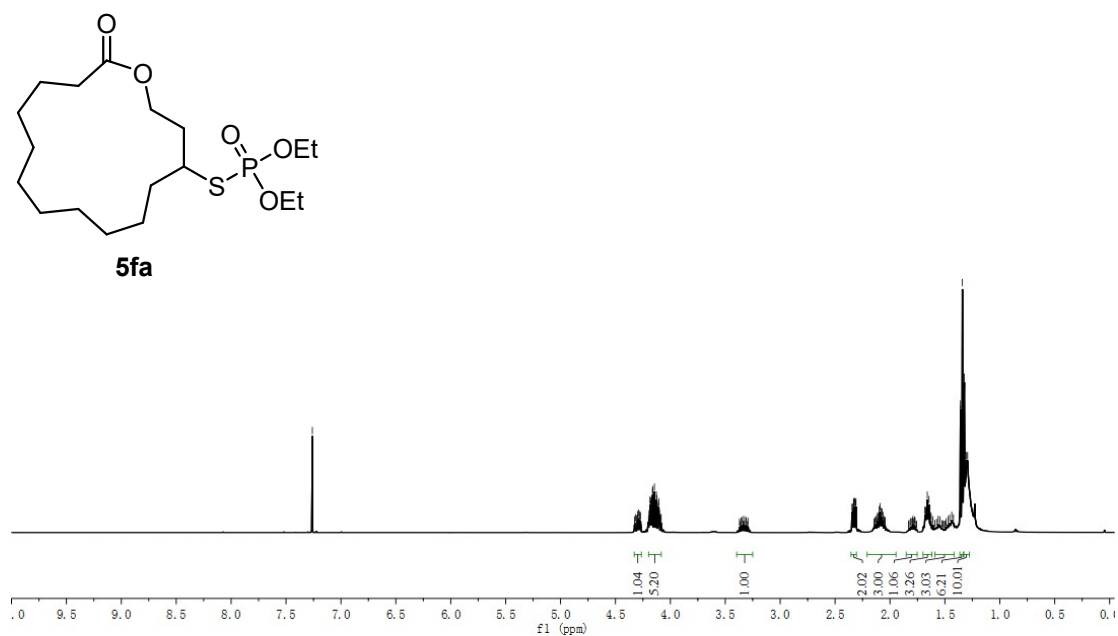

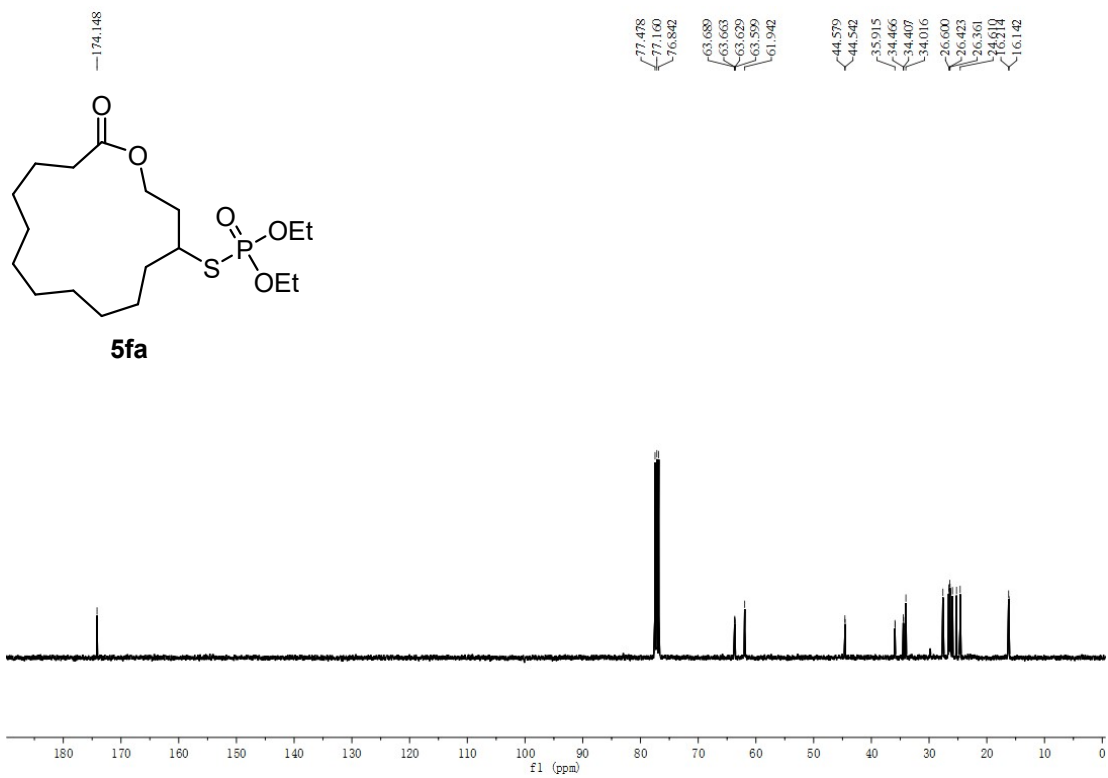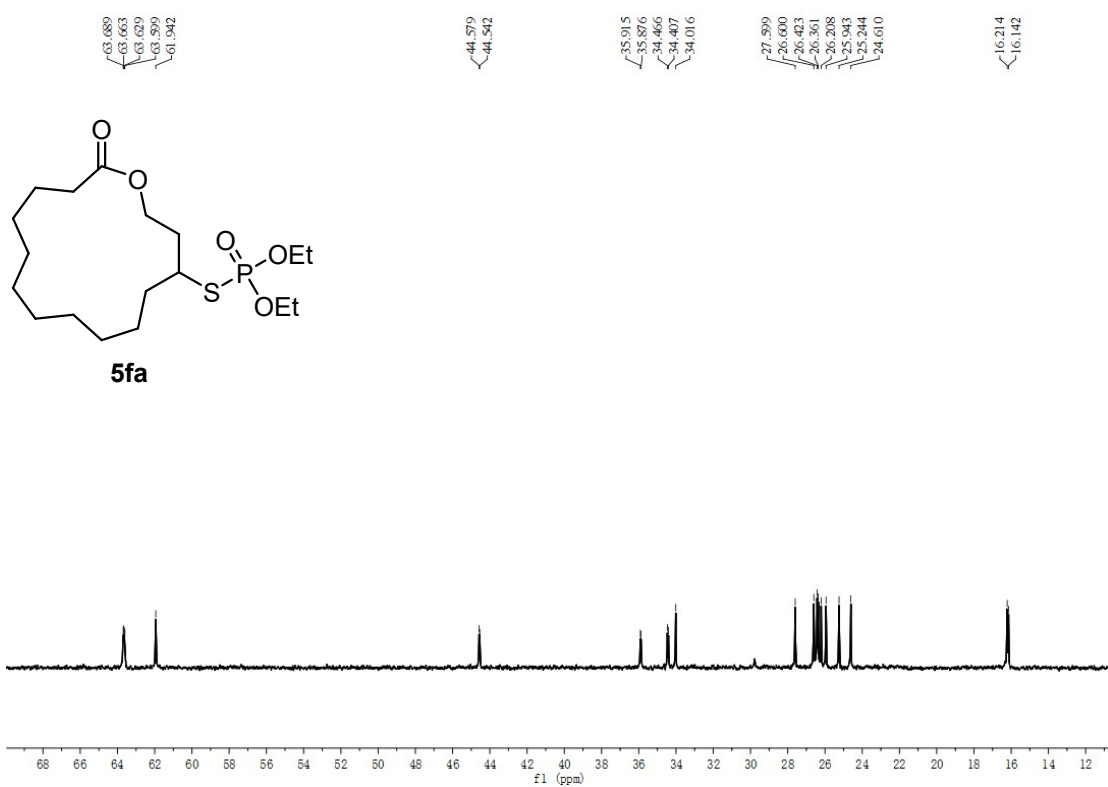

$^{31}\text{P}$  NMR (162 MHz,  $\text{CDCl}_3$ ),  $^1\text{H}$  NMR (400 MHz,  $\text{CDCl}_3$ ) and  $^{13}\text{C}$  NMR (100 MHz,  $\text{CDCl}_3$ ) spectra of product **5ga**

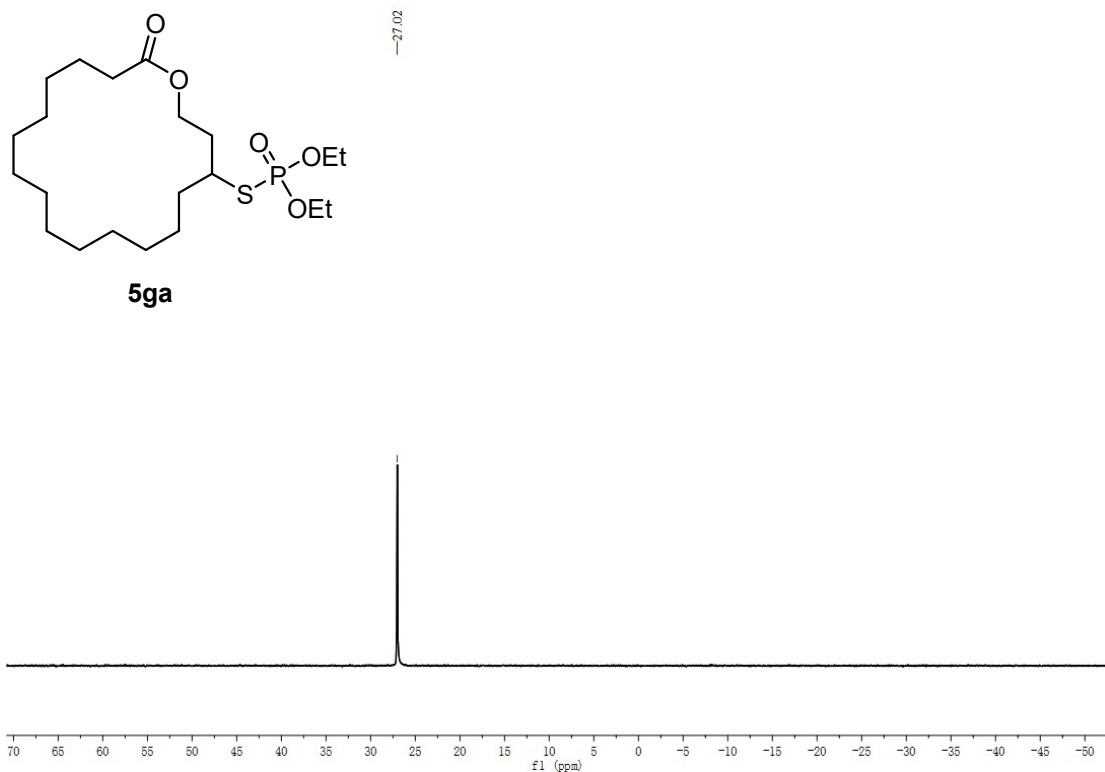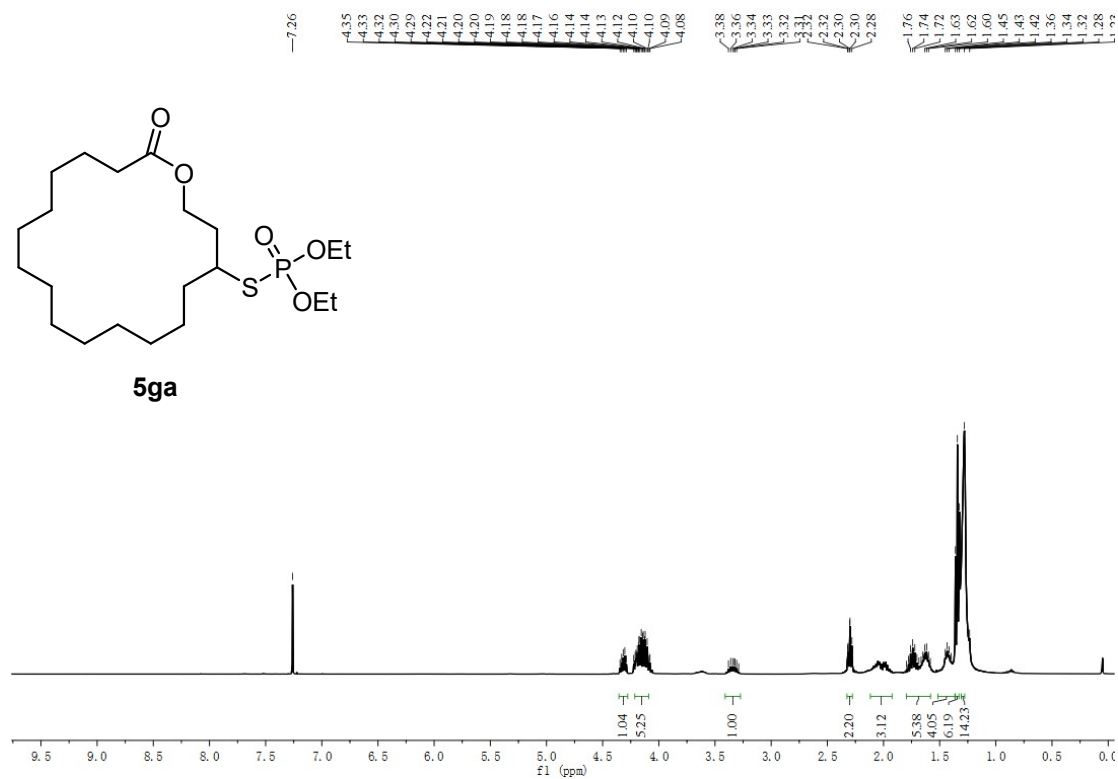

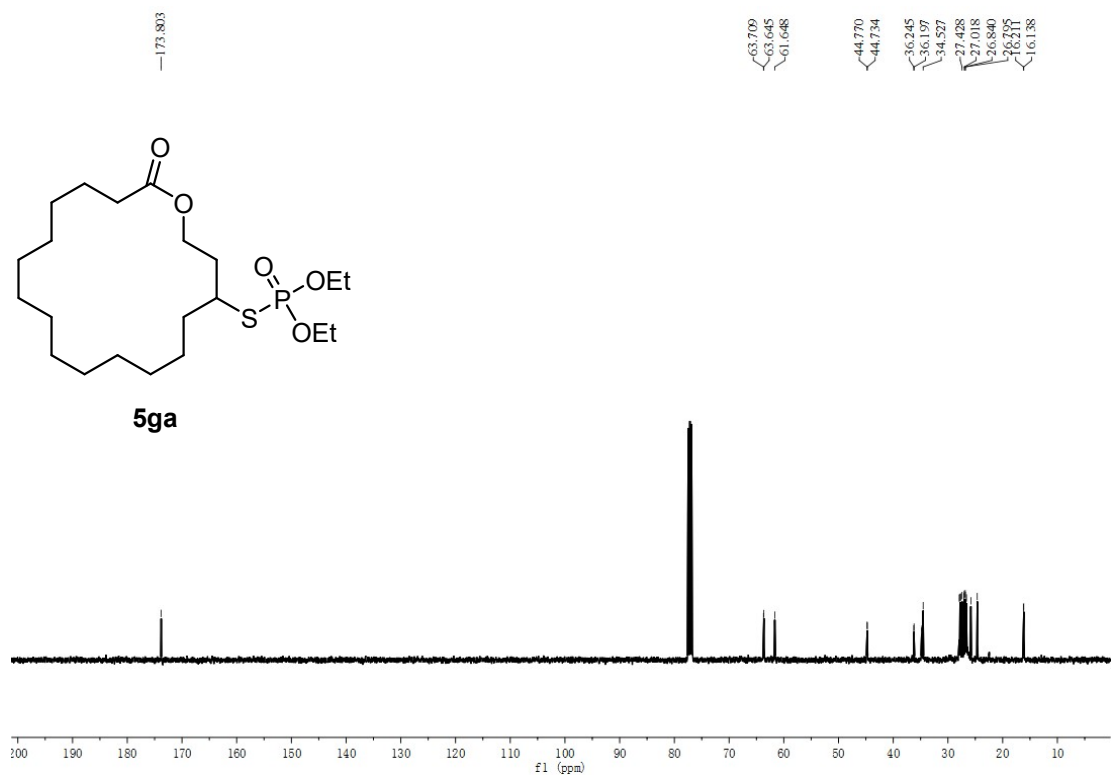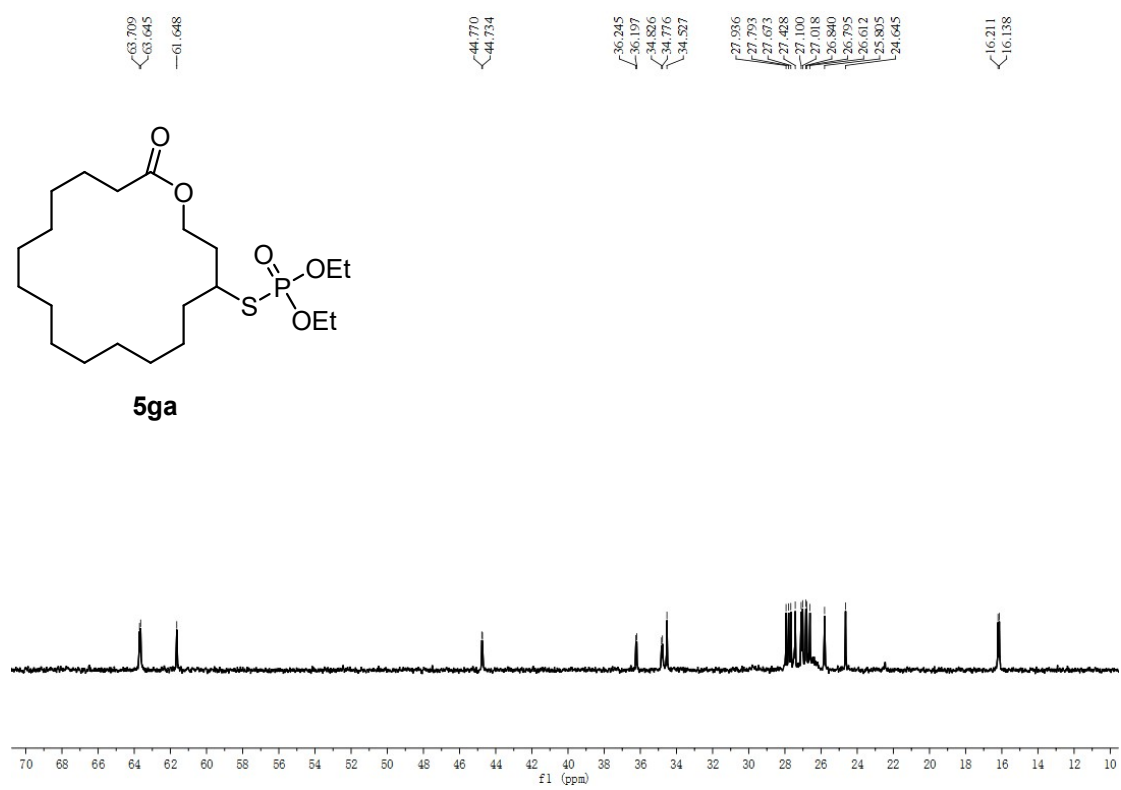



## 15. $^{31}\text{P}$ NMR, $^1\text{H}$ NMR and $^{13}\text{C}$ NMR Spectra of Products 6aa and 7aa

$^{31}\text{P}$  NMR (162 MHz,  $\text{CDCl}_3$ ),  $^1\text{H}$  NMR (400 MHz,  $\text{CDCl}_3$ ) and  $^{13}\text{C}$  NMR (100 MHz,  $\text{CDCl}_3$ ) spectra of product 6aa

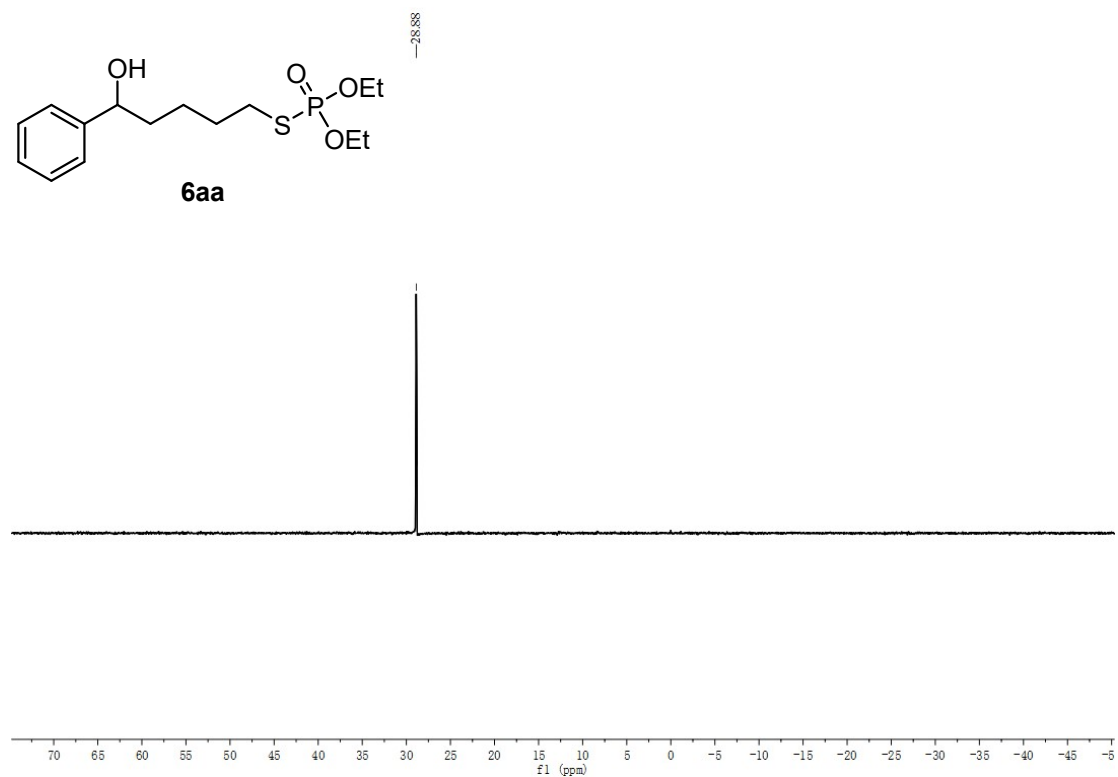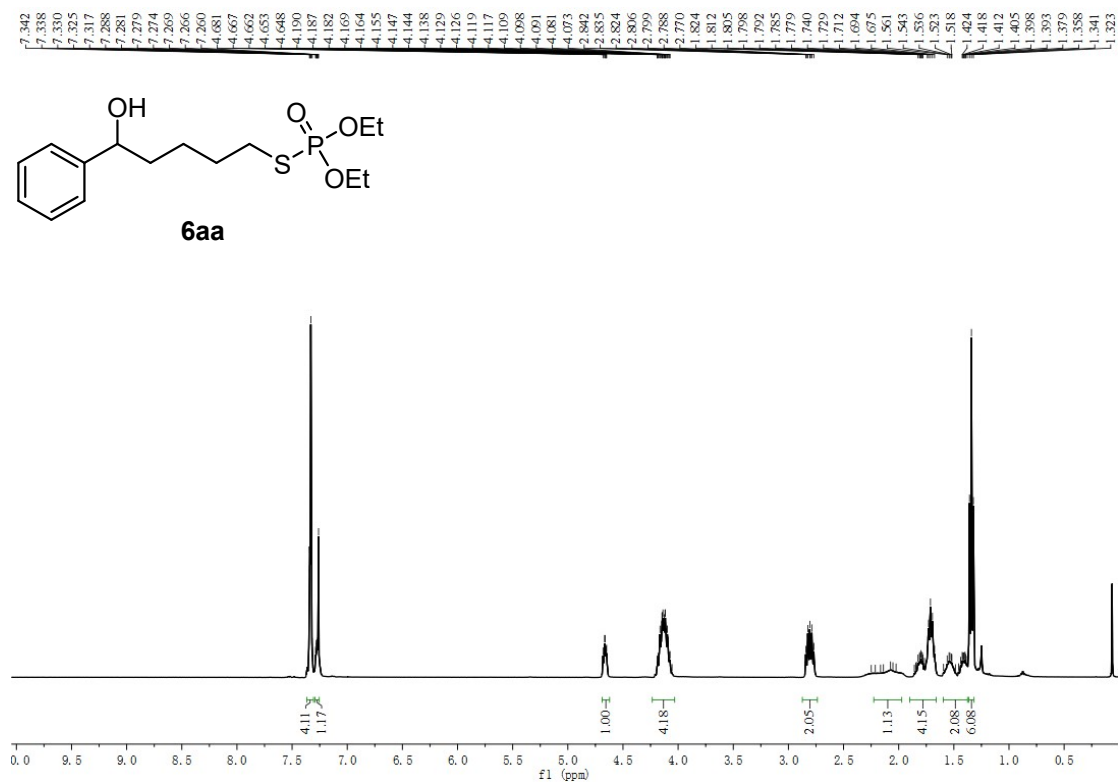

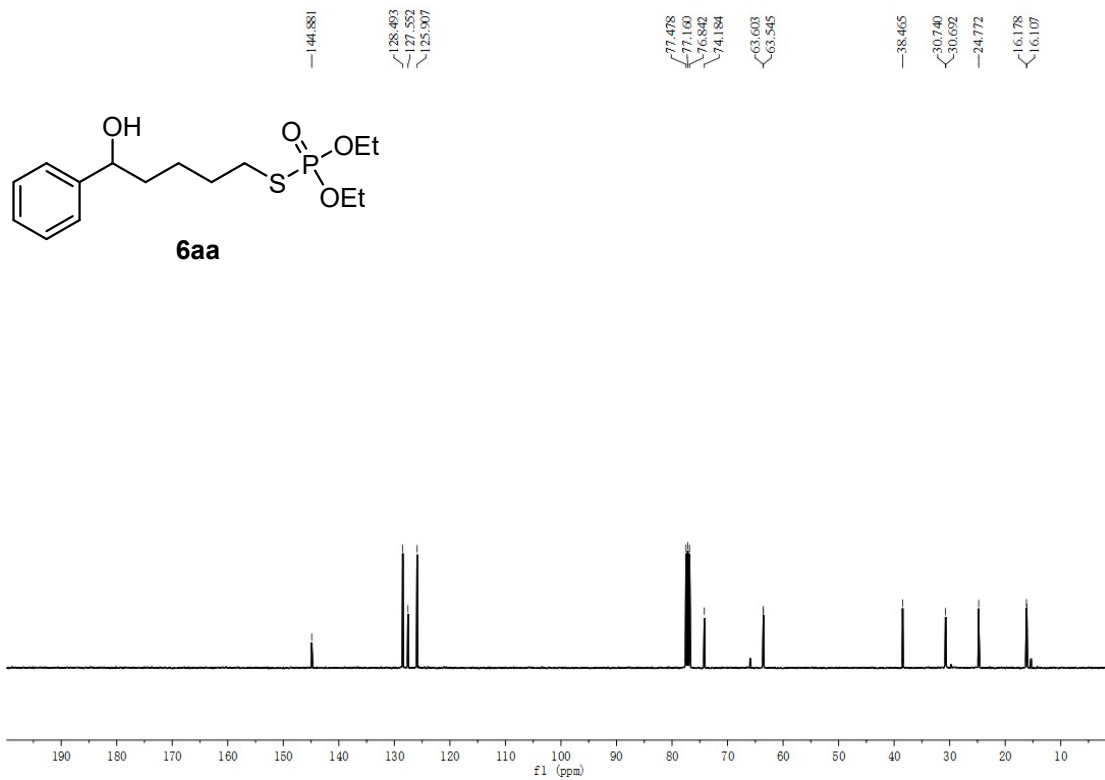

$^{31}\text{P}$  NMR (162 MHz,  $\text{CDCl}_3$ ),  $^1\text{H}$  NMR (400 MHz,  $\text{CDCl}_3$ ) and  $^{13}\text{C}$  NMR (100 MHz,  $\text{CDCl}_3$ ) spectra of product **7**

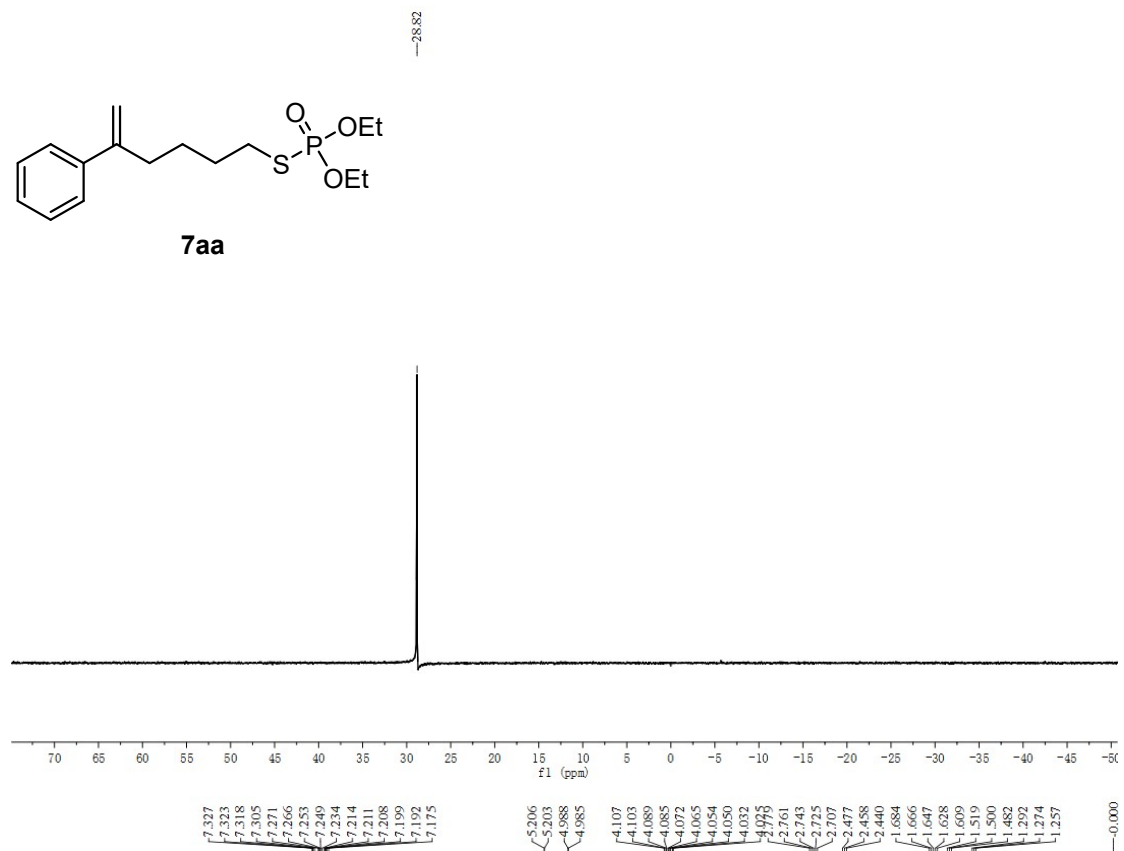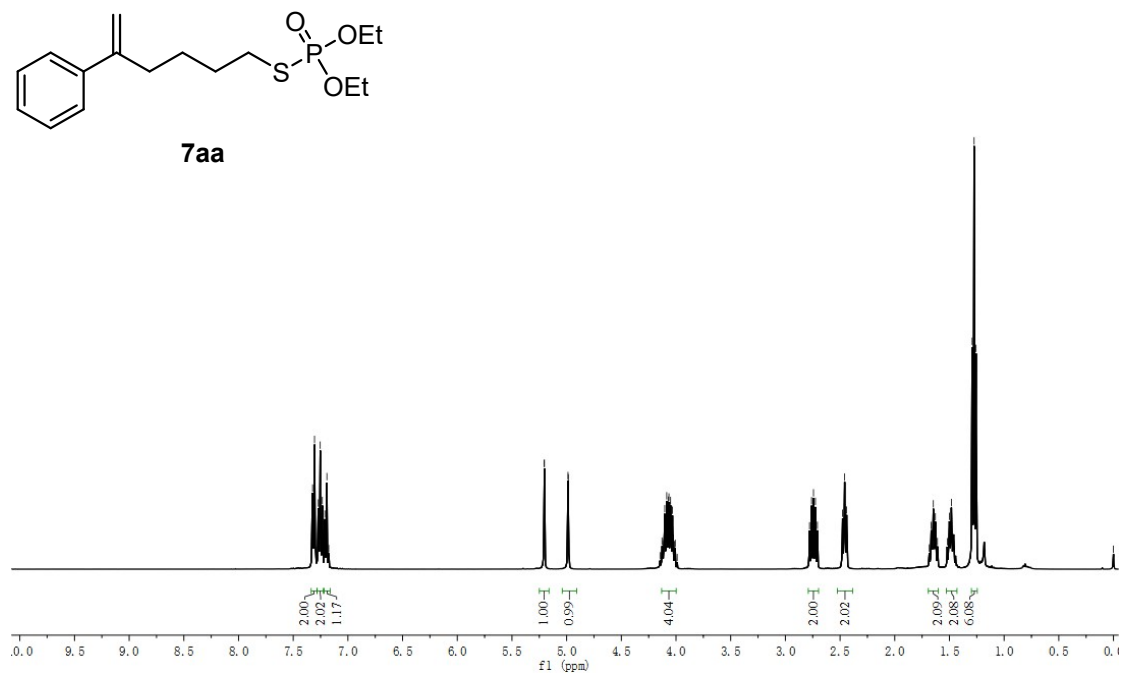

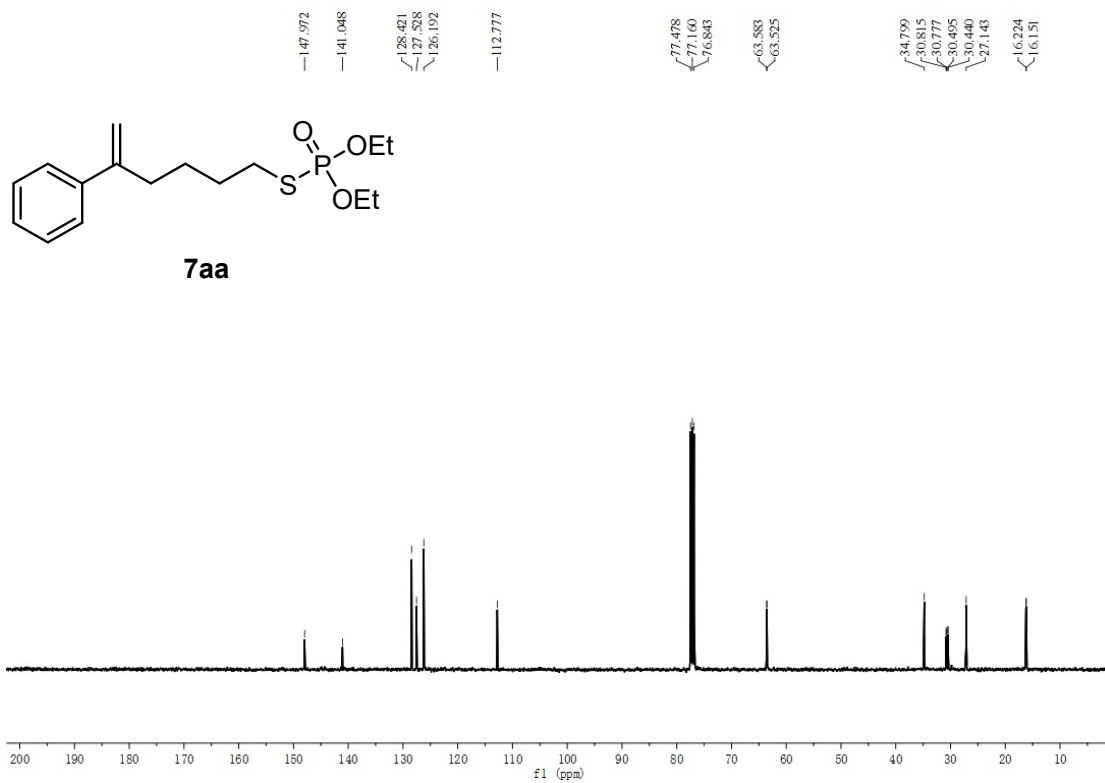

Supplement: d3ob00673e1.pdf [file d3ob00673e1.pdf]
